# Supplementary material for: Evaluation of gene validity for CPVT and short QT syndrome in sudden arrhythmic death
Source: PubMed Central journal article supplement — Eur Heart J. 2021 Sep 24;43(15):1500–10. doi: 10.1093/eurheartj/ehab687 (PMC9009401; doi:10.1093/eurheartj/ehab687), 2021-09-24
Supplement: ehab687_supplementary_data.pdf [file ehab687_supplementary_data.pdf]

## SUPPLEMENTAL MATERIAL

### List of investigators:

For more information on the Gene Curation Expert Panels, see the ClinGen pages for Catecholaminergic Polymorphic Ventricular Tachycardia:

<https://clinicalgenome.org/affiliation/40074> and Short QT Syndrome:

<https://clinicalgenome.org/affiliation/40075/>.

### ClinGen CPVT/SQTS Gene Curation Expert Panel:

Michael H Gollob, MD (Chair)

The Division of Cardiology, Toronto General Hospital and The Toronto General Hospital Research Institute, University Health Network and University of Toronto, Toronto, ON, Canada

Melanie Care, MSc

The Division of Cardiology, Toronto General Hospital, University Health Network and University of Toronto, Toronto, ON, Canada

John Garcia, PhD

Invitae Corp. San Francisco, CA, USA

Ray E Hershberger, MD

Divisions of Human Genetics and Cardiovascular Medicine, Department of Internal Medicine, and the Davis Heart and Lung Research Institute, The Ohio State University Wexner Medical Center, Columbus, OH, USA.

Valeria Novelli, PhD

Fondazione Policlinico Universitario A. Gemelli I.R.C.C.S., and Istituto di Medicina Genomica, Università Cattolica del Sacro Cuore, Rome, Italy

Marco V Perez, MD

Division of Cardiovascular Medicine, Department of Medicine, Stanford University, Stanford, CA, USA

Amy C Sturm, MSc

Geisinger Genomic Medicine Institute, Danville, PA, USA

James S Ware, PhD, MRCP

National Heart & Lung Institute and MRC London Institute of Medical Sciences, Imperial College London, Royal Brompton and Harefield Hospitals NHS Trust, London, UK

Arthur AAM Wilde, MD, PhD

Department of Clinical and Experimental Cardiology, Amsterdam Cardiovascular Sciences, Amsterdam UMC, University of Amsterdam, Heart Center, Amsterdam, The Netherlands

Wojciech Zareba, MD, PhD

Cardiology Unit of the Department of Medicine, University of Rochester Medical Center, Rochester, NY, USA

**Bio-curators:**

Emanuela Abiusi, MD

Fondazione Policlinico Universitario A. Gemelli I.R.C.C.S., and Istituto di Medicina Genomica, Università Cattolica del Sacro Cuore, Rome, Italy

Arnon Adler, MD

Division of Cardiology, Peter Munk Cardiac Centre, University Health Network and Department of Medicine, University of Toronto, Toronto, ON ,Canada

Simona Amenta, MD

Fondazione Policlinico Universitario A. Gemelli I.R.C.C.S., and Istituto di Medicina Genomica, Università Cattolica del Sacro Cuore, Rome, Italy

Ahmad S Amin, MD, PhD

Department of Clinical and Experimental Cardiology, Amsterdam Cardiovascular Sciences, Amsterdam UMC, University of Amsterdam, Heart Center, Amsterdam, The Netherlands

Hennie Bikker, PhD

Department of Clinical Genetics, Amsterdam UMC, University of Amsterdam, Amsterdam, The Netherlands

Melanie Care, MSc

The Division of Cardiology, Toronto General Hospital, University Health Network and University of Toronto, Toronto, ON, Canada

Harriet Feilotter, PhD

Department of Pathology and Molecular Medicine, Queen's University, Kingston, ON, Canada

Francesco Mazzarotto, PhD

Department of Experimental and Clinical Medicine, University of Florence, Florence, Italy

Eline A. Nannenbergh, MD, PhD

Department of Clinical Genetics, Amsterdam UMC, University of Amsterdam, Amsterdam, The Netherlands

Valentina Trevisan, MD

Fondazione Policlinico Universitario A. Gemelli I.R.C.C.S., and Istituto di Medicina Genomica, Università Cattolica del Sacro Cuore, Rome, Italy

## Supplemental Methods

### *Selection of genes for curation*

Selection of genes for evaluation by the Gene Curation Expert Panel (GCEP) was performed by a PubMed searches. For catecholaminergic polymorphic ventricular tachycardia (CPVT), this included all publications with the term (“gene” OR “genetic”) AND (“CPVT” OR “catecholaminergic polymorphic ventricular tachycardia”) in all fields. For short QT syndrome (SQTS), this included all publications with the term “short QT syndrome” or “SQTS” in all fields or “short QT” in the title/abstract: "short qt syndrome"[Supplementary Concept] OR "short qt syndrome"[All Fields] OR "short qt syndrome"[All Fields] OR "short qt"[Title/Abstract]. Publications were triaged to identify genes reported to be involved in causality of CPVT or SQTS.

The composition of CPVT/SQTS panels used in clinical and commercial genetic testing were also assessed using the National Centre for Biotechnology Information’s (NCBI) Genetic Testing Registry (<https://www.ncbi.nlm.nih.gov/gtr/>) (accessed in December 2020)<sup>1</sup>. Panels including conditions other than CPVT/SQTS (i.e. broad arrhythmia or cardiac panels) and those limited to single genes were excluded.

### *Gene curation framework*

Three teams of biocurators (comprising three members per team) curated each gene, as previously described for the BrS and LQTS curation panels<sup>2,3</sup>. Each team worked blinded to the other curation teams in applying the ClinGen Gene Curation Framework, utilising version 7 of the standard operating procedure<sup>4</sup>. Each curation team reviewed, assessed and scored the same manuscripts identified during the literature search described above. Curation team members were required to review the standard operating procedure and received training in the application of the analytic process. This framework provides a systematic, evidence-based approach for assessing reported gene-disease associations. The semi-quantitative scoring system categorises each gene-disease relationship into a clinical validity classification level based on the sum of its accompanying evidence - *Definitive* (12–18 points and replicated over time in the literature), *Strong* (12–18 points), *Moderate* (7–11 points), and *Limited* (1–6 points). Genetic and experimental evidence were evaluated separately, allowing for a maximum of 12 and 6 points respectively for each gene. Gene-disease associations were evaluated for specific modes of inheritance (autosomal dominant or autosomal recessive), with one gene (*CASQ2* in CPVT) assessed separately for both modes.

Genetic evidence was primarily based on case-level data for CPVT or SQTS probands with variants that were rare enough in the population to be potentially causative (depending on the mode of inheritance). Rare missense variants required additional evidence such as functional assay validation or proven *de novo* inheritance to be scored. Additional genetic evidence was derived from the demonstration of segregation of variants with disease in family pedigrees and the enrichment of rare variants in case-control cohort studies - the scores applied for these classes of evidence were weighted according to the design and quality of the study. Information on the phenotype of reported individuals was critical in the evaluation of genetic evidence, with scores downgraded where insufficient evidence was provided for a definitive CPVT or SQTS diagnosis, or where atypical features suggestive of an alternative phenotype were observed. For example, the observation of ventricular arrhythmias at rest (instead of or in addition to with exercise testing), ECG features like prolonged QTc or QUc, or structural heart abnormalities were deemed to indicate a non-CPVT diagnosis. Experimental evidence scores were based on the interpretation and phenotypic relevance of *in vitro* assays assessing

functional alterations of the disease-implicated gene variants, and model organism or rescue studies, as proposed by MacArthur *et al*<sup>5</sup>.

A gene curation expert panel, consisting of 9 additional individuals with collectively dozens of years of experience in clinical care or research in the field of inherited arrhythmias and clinical genetics, was tasked with reviewing the three independent classifications, performing a synthesised evaluation and assigning a final classification on a gene-by-gene basis. For each gene, the scores and classifications of the curation groups and the underlying published evidence were presented and discussed at monthly Zoom meetings in order to reach a final consensus classification. The panel had the option of modifying the findings of the curation teams (upgrade, no change, downgrade) based on the available evidence, including deciding whether genes with *Strong* evidence should be classified as *Definitive* (i.e. the association has been replicated over time) and whether *Limited* evidence genes should be downgraded to *Disputed* (the absence of any substantial evidence to support causality with an unambiguous CPVT/SQTS phenotype). For any classifications where unanimity was not reached during discussion, panel members subsequently voted for their preferred classification ( $\geq 7/9$  votes in agreement was deemed as a consensus finding, otherwise no consensus was reached).

#### *Population rare variant frequencies*

Because *CACNA1C*, *CACNB2* and *CACNA2D1* were included in the majority of genetic testing laboratories' panels but were classified as *Disputed* for SQTS by the Expert Panel, we aimed to assess the expected number of missense variants identified in these genes in the general population. To that end, the cumulative allele frequency of rare missense variants (minor allele frequency  $< 0.001$ ) was calculated based on the total allele frequency in gnomAD (accessed in December 2020). After subtracting the frequency of the second allele in homozygous cases, the result was multiplied by 2 to in order reach the carrier rate in the population.

## Supplemental References

1. Rubinstein WS, Maglott DR, Lee JM, Kattman BL, Malheiro AJ, Ovetsky M, Hem V, Gorelenkov V, Song G, Wallin C, Husain N, Chitipiralla S, Katz KS, Hoffman D, Jang W, Johnson M, Karmanov F, Ukrainchik A, Denisenko M, Fomous C, Hudson K, Ostell JM. The NIH genetic testing registry: a new, centralized database of genetic tests to enable access to comprehensive information and improve transparency. *Nucleic Acids Res* 2013;**41**:D925-35.
2. Hosseini SM, Kim R, Udupa S, Costain G, Jobling R, Liston E, Jamal SM, Szybowska M, Morel CF, Bowdin S, Garcia J, Care M, Sturm AC, Novelli V, Ackerman MJ, Ware JS, Hershberger RE, Wilde AAM, Gollob MH, National Institutes of Health Clinical Genome Resource Consortium. Reappraisal of Reported Genes for Sudden Arrhythmic Death. *Circulation* 2018;**138**:1195–1205.
3. Adler A, Novelli V, Amin AS, Abiusi E, Care M, Nannenber EA, Feilotter H, Amenta S, Mazza D, Bikker H, Sturm AC, Garcia J, Ackerman MJ, Hershberger RE, Perez M V, Zareba W, Ware JS, Wilde AAM, Gollob MH. An International, Multicentered, Evidence-Based Reappraisal of Genes Reported to Cause Congenital Long QT Syndrome. *Circulation* 2020;**141**:418–428.
4. Strande NT, Riggs ER, Buchanan AH, Ceyhan-Birsoy O, DiStefano M, Dwight SS, Goldstein J, Ghosh R, Seifert BA, Sneddon TP, Wright MW, Milko L V, Cherry JM, Giovanni MA, Murray MF, O'Daniel JM, Ramos EM, Santani AB, Scott AF, Plon SE, Rehm HL, Martin CL, Berg JS. Evaluating the Clinical Validity of Gene-Disease Associations: An Evidence-Based Framework Developed by the Clinical Genome Resource. *Am J Hum Genet* 2017;**100**:895–906.
5. MacArthur DG, Manolio TA, Dimmock DP, Rehm HL, Shendure J, Abecasis GR, Adams DR, Altman RB, Antonarakis SE, Ashley EA, Barrett JC, Biesecker LG, Conrad DF, Cooper GM, Cox NJ, Daly MJ, Gerstein MB, Goldstein DB, Hirschhorn JN, Leal SM, Pennacchio LA, Stamatoyannopoulos JA, Sunyaev SR, Valle D, Voight BF, Winckler W, Gunter C. Guidelines for investigating causality of sequence variants in human disease. *Nature* 2014;**508**:469–476.

**Supplemental Table 1**

| <b>Diagnostic Laboratory</b>                  | <b>GTR ID</b>   | <b>Country</b> | <b>No. of genes</b> | <b>Genes on CPVT panel</b>                                               |
|-----------------------------------------------|-----------------|----------------|---------------------|--------------------------------------------------------------------------|
| Cincinnati Children's Hospital Medical Center | GTR000530644.2  | USA            | 11                  | RYR2, CASQ2, TRDN, TECRL, CALM1, CALM2, CALM3, ANK2, KCNJ2, SCN5A, KCNQ1 |
| Health in Code                                | GTR000530672.1  | Spain          | 9                   | RYR2, CASQ2, TRDN, CALM1, CALM2, CALM3, ANK2, KCNJ2, SCN5A               |
| Connective Tissue Gene Tests                  | GTR000592144.1  | USA            | 9                   | RYR2, CASQ2, TRDN, TECRL, CALM1, CALM2, CALM3, ANK2, KCNJ2               |
| Blueprint Genetics                            | GTR000552718.3  | Finland        | 9                   | RYR2, CASQ2, TRDN, TECRL, CALM1, CALM2, CALM3, ANK2, KCNJ2               |
| Fulgent Genetics                              | GTR000515861.5  | USA            | 9                   | RYR2, CASQ2, TRDN, CALM1, CALM2, CALM3, ANK2, KCNJ2, KCNQ1               |
| Prevention Genetics                           | GTR000507622.20 | USA            | 8                   | RYR2, CASQ2, TRDN, CALM1, ANK2, KCNJ2, SCN5A, KCNQ1                      |
| Phosphorus Diagnostics LLC                    | GTR000558052.2  | USA            | 8                   | RYR2, CASQ2, TRDN, CALM1, CALM2, CALM3, ANK2, KCNJ2                      |
| Invitae                                       | GTR000551806.3  | USA            | 8                   | RYR2, CASQ2, TRDN, CALM1, CALM2, CALM3, ANK2, KCNJ2                      |
| Knight Diagnostic Laboratories                | GTR000552153.1  | USA            | 6                   | RYR2, CASQ2, TRDN, CALM1, ANK2, KCNJ2                                    |
| DDC Clinic Molecular Diagnostics Laboratory   | GTR000523353.10 | USA            | 6                   | RYR2, CASQ2, TRDN, CALM1, CALM3, KCNJ2                                   |
| Ambry Genetics                                | GTR000560522.7  | USA            | 4                   | RYR2, CASQ2, TRDN, CALM1                                                 |
| LifeLabs Genetics                             | GTR000573949.1  | Canada         | 3                   | RYR2, CASQ2, KCNJ2                                                       |

*Details of CPVT-specific clinical genetic testing panels listed in the NCBI Genetic Testing Registry (<https://www.ncbi.nlm.nih.gov/gtr/>) (accessed in December 2020).*

## Gene curation summaries

Detail curation summaries and classification matrices for each gene are shown below. Please note that classifications may change over time as curations are updated to account for new evidence. The most up-to-date information can be found by searching for the genes on <http://clinicalgenome.org>.

## CPVT

### ***RYR2* - autosomal dominant CPVT - DEFINITIVE**

*RYR2* was evaluated for autosomal dominant catecholaminergic polymorphic ventricular tachycardia (CPVT). *RYR2* was the first gene to be associated with CPVT in 2001. It is the predominant gene associated with the condition, with approximately half of all CPVT probands carrying a pathogenic *RYR2* variant. Most disease-causing variants in *RYR2* are missense variants which tend to cluster in several pathogenic hotspots. Human genetic evidence supporting this gene-disease relationship includes case-level data, segregation data, and case-control data. A significant excess of rare (MAF<0.0001) *RYR2* variants was observed in CPVT cohorts compared to ExAC population controls (Kapplinger et al, 2018, PMID:29453246), with rare variant yields higher in definitive CPVT cases (59%) than possible CPVT cases (31%) and all CPVT genetic testing referrals (18%). There is a plethora of case-level data to support the association of *RYR2* with CPVT, including numerous examples of *de novo* inheritance (Priori et al, 2001, PMID:11208676; Priori et al, 2002, PMID:12093772). Segregation of *RYR2* variants with disease in family pedigrees has also been noted, in particular a 1404 member extended pedigree from Gran Canaria island in Spain, covering 10 generations with 178 carriers of the *RYR2*:p.Gly357Ser variant (Wangüemert et al, 2015, PMID:25814417). In addition, this gene-disease assertion is supported by experimental evidence, including functional alteration, non-human model organism, and rescue in non-human model organism. Variants detected in patients have been introduced to non-patient cells in numerous studies (including HEK293, HL-1 cardiomyocytes and mouse ventricular cells) with clear effects on Ca<sup>2+</sup> sensitivity and release (Wangüemert et al, 2015, PMID:25814417; George et al, 2003, PMID:12919952; Loaiza et al, 2013, PMID:23152493; Zhao et al, 2014, PMID:25775566). Knock-in mice have been generated for several *RYR2* variants detected in CPVT patients which demonstrate arrhythmia phenotypes typical of CPVT (Cerrone et al, 2005, PMID:15890976; Kannankeril et al, 2006, PMID:16873551; Loaiza et al, 2013, PMID:23152493). Rescue of the CPVT phenotype in mouse models has also been noted, with correction of the p.Arg176Gln variant by AAV-CRISPR leading to a significant reduction in arrhythmias compared to uncorrected knock in mice (Pan et al, 2018, PMID:30355031). Additional evidence is available in the literature, but the maximum score for genetic evidence and experimental evidence has been reached. In summary, *RYR2* variants are definitively associated with autosomal dominant CPVT. This has been repeatedly demonstrated in both the research and clinical diagnostic settings, and has been upheld over time. Note: All CPVT genes were curated by 3 separate blinded teams. The evidence and scores reached by these 3 teams was reviewed by the CPVT Gene Curation Expert Panel (GCEP). The classification and summary presented here is the conclusion of this GCEP's analysis according to evidence teams' efforts. This classification was approved by the ClinGen Catecholaminergic Polymorphic Ventricular Tachycardia Gene Curation Expert Panel on 20<sup>th</sup> January, 2021 (SOP Version 7).

### **CASQ2 - autosomal recessive CPVT - DEFINITIVE**

*CASQ2* was evaluated for autosomal recessive catecholaminergic polymorphic ventricular tachycardia (CPVT). Biallelic loss-of-function variants in *CASQ2* (homozygous and compound heterozygous) have been reported in numerous CPVT probands, including frameshift, nonsense and splice donor/acceptor variants, as well as other splice region variants with verified effects on splicing and missense variants with verified loss-of-function effects (Postma et al, 2002, PMID:12386154; di Barletta et al, 2006, PMID:16908766; Roux-Buisson et al, 2011, PMID:21618644). Additional genetic evidence comes from the segregation of the homozygous p.Asp307His variant with CPVT in a large family from Israel (LOD score = 8.2), which is highly likely to be the causative variant even though not every gene in the linked region was sequenced (Lahat et al, 2004, PMID:15176429). The association of *CASQ2* with autosomal recessive CPVT is also supported by a plethora of experimental evidence, including functional alteration, non-human model organism, and rescue in non-human model organism. Most of this evidence has been generated from *CASQ2* knockout mice and knock-in mice for variants detected in CPVT patients (di Barletta et al, 2006, PMID:16908766; Dirksen et al, 2007, PMID:17449018; Song et al, 2007, PMID:17607358; Rizzi et al, 2008, PMID:18583715). AAV-mediated injection of *CASQ2* in knockout and p.Asp307His mice has been shown to at least partially rescue the CPVT phenotype (Kutzwald Josefson et al, 2017, PMID:28336343). Additional evidence is available in the literature, but the maximum score for genetic evidence and experimental evidence has been reached. In summary, *CASQ2* variants are definitively associated with autosomal recessive CPVT. This has been repeatedly demonstrated in both the research and clinical diagnostic settings, and has been upheld over time. Note: All CPVT genes were curated by 3 separate blinded teams. The evidence and scores reached by these 3 teams was reviewed by the CPVT Gene Curation Expert Panel (GCEP). The classification and summary presented here is the conclusion of this GCEP's analysis according to evidence teams' efforts. This classification was approved by the ClinGen Catecholaminergic Polymorphic Ventricular Tachycardia Gene Curation Expert Panel on 20<sup>th</sup> January, 2021 (SOP Version 7).

### **CASQ2 - autosomal dominant CPVT - MODERATE**

*CASQ2* was evaluated for autosomal dominant catecholaminergic polymorphic ventricular tachycardia (CPVT). Biallelic loss-of-function variants in *CASQ2* are definitively associated with autosomal recessive CPVT but some reports have also associated monoallelic or heterozygous *CASQ2* variants with this condition. The main evidence for autosomal dominant *CASQ2* association comes from a multi-centre study describing CPVT patients with *CASQ2* variants (Ng et al, 2020, PMID:32693635). This study includes 12 probands with heterozygous variants in *CASQ2*, as well as an assessment of heterozygous relatives of probands with homozygous/compound heterozygous *CASQ2* variants (8/37 of these heterozygous relatives had a positive CPVT phenotype). While this study provides a substantive body of evidence to support autosomal dominant *CASQ2* association with CPVT, the expert panel believed the findings should be cautiously interpreted and the default scoring for these variants was downgraded for a number of reasons. The multi-centre nature of the study precluded standardised phenotyping of the probands and relatives and therefore we could not assume that every phenotype-positive individual had a definitive diagnosis of CPVT. Additionally, several of the variants described have a gnomAD population minor allele frequency that is incompatible with being a penetrant autosomal dominant variant for a disease with the prevalence of CPVT ( $MAF > 1 \times 10^{-5}$ ). The *CASQ2* variants described in a heterozygous state in this study include truncating variants (nonsense, frameshift, splice acceptor/donor), a splice region variant (c.738-3C>A) where the effect on splicing



was not proven and missense variants (functional in vitro turbidity assays revealed that 6/7 missense variants exhibited filamentation defects but had dimerisation profiles similar to wildtype). In a separate study, the heterozygous p.Lys180Arg variant segregated with disease in a family (the published LOD score was 3.0 although there were only five meioses between genotype and phenotype positive individuals) (Gray et al, 2016, PMID:27157848). Additional functional evidence was observed in heterozygous null mice (catecholaminergic challenge and programmed stimulation induced significantly more ventricular ectopy in *CASQ2*<sup>+/-</sup> mice than in *CASQ2*<sup>+/+</sup> mice) (Chopra et al, 2007, PMID:17656677). In summary, there is moderate evidence to support this gene-disease relationship. More evidence is needed to definitively establish the relationship of *CASQ2* with autosomal dominant CPVT. Note: All CPVT genes were curated by 3 separate blinded teams. The evidence and scores reached by these 3 teams was reviewed by the CPVT Gene Curation Expert Panel (GCEP). The classification and summary presented here is the conclusion of this GCEP's analysis according to evidence teams' efforts. This classification was approved by the ClinGen Catecholaminergic Polymorphic Ventricular Tachycardia Gene Curation Expert Panel on 20<sup>th</sup> January, 2021 (SOP Version 7).

#### ***TRDN* - autosomal recessive CPVT - DEFINITIVE**

*TRDN* was evaluated for autosomal recessive catecholaminergic polymorphic ventricular tachycardia (CPVT). *TRDN* encodes Triadin, a protein important for calcium-release regulation from the sarcoplasmic reticulum. Biallelic loss of function variants in *TRDN* have been described in CPVT patients in a number of studies (Roux-Buisson et al, 2012, PMID:22422768; Rooryck et al, 2015, PMID:26200674; Walsh et al, 2016, PMID:26768964), including nonsense (p.Gln205Ter, p.Glu168Ter), frameshift (c.53\_56del), intronic (c.22+29A>G, with effect on splicing functionally proven) and missense (p.Thr59Arg, the mutant protein was confirmed to be degraded in COS-7 cells and after transfection into knockout mice) variants. An additional report described a homozygous deletion of *TRDN* exon 2 in an infant who suffered cardiac arrest and subsequent arrhythmia episodes, but this case was scored with only one point due to uncertainty about the phenotype and the additional presence of a *RYR2* variant of uncertain significance in this patient (O'Callaghan et al, 2018, PMID:30479949). Biallelic truncating variants in *TRDN* have also been reported in patients with Long QT syndrome, and the LQTS Gene Curation Expert Panel have previously classified *TRDN* as having strong evidence for association with LQTS, though with an atypical LQTS phenotype. The variable and atypical phenotypes associated with so-called "Triadin knockout syndrome" should therefore be taken into account when interpreting patients with *TRDN* biallelic loss of function variants. The association of *TRDN* with CPVT is also supported by substantial experimental evidence, including expression in heart tissue (Cacheux et al, 2019, PMID:31607542), protein interaction with *RYR2* and *CASQ2* (Guo et al, 1996, PMID:8550602) and relevant biochemical function in regulating the contractile properties of the heart (Kirchhefer et al, 2001, PMID:11069905). Additionally, knockout mice are directly relevant to the genotypes observed in CPVT patients with *TRDN* variants, with several studies demonstrating a relevant CPVT phenotype in knockout mice for non-human model organism (e.g. Cacheux et al, 2019, PMID:31607542; Chopra et al, 2009, PMID:19383796) and functional alteration in non-patient cells derived from these mouse knockouts (Chopra et al, 2009, PMID:19383796). Partial rescue of the CPVT phenotype has also been observed in knockout mice treated with AAV2/9 virus encoding rat *TRDN* isoform Trisk32 (Cacheux et al, 2019, PMID:31607542). In summary, *TRDN* variants are definitively associated with autosomal recessive CPVT. Note: All CPVT genes were curated by 3 separate blinded teams. The evidence and scores reached by these 3 teams was reviewed by the CPVT Gene Curation Expert Panel (GCEP). The classification and summary presented here is the conclusion of this GCEP's

analysis according to evidence teams' efforts. This classification was approved by the ClinGen Catecholaminergic Polymorphic Ventricular Tachycardia Gene Curation Expert Panel on 20<sup>th</sup> January, 2021 (SOP Version 7).

#### **TECRL - autosomal recessive CPVT - DEFINITIVE**

*TECRL* was evaluated for autosomal recessive catecholaminergic polymorphic ventricular tachycardia (CPVT). Biallelic loss of function variants in *TECRL* were first reported in 2016 (Devalla et al, 2016, PMID:27861123), with a homozygous missense variant (p.Arg196Gln) detected in two unrelated patients of French Canadian origin and a homozygous splice donor variant (c.331+1G>A) detected in a large consanguineous Sudanese pedigree where 7/13 children (all homozygous) has exercise-induced arrhythmias or sudden cardiac death (LOD=4.36). Another report described compound heterozygous variants in a 13 year old child with CPVT (p.Arg196Gln and c.918+3T>G), although the effect of the splice region variant was not proven (Xie et al, 2019, PMID:30790670). A multi-centre review published in 2020 provided an update on these cases and described two additional CPVT cases (homozygous p.Tyr197Ter nonsense variant and homozygous exon 2 deletion) and a family with three children with sudden cardiac death, where one was homozygous for the c.331+1G>A splice donor variant (Webster et al, 2020, PMID:33367594). Finally, another study described 4 CPVT cases with *TECRL* variants detected by diagnostic sequencing, including homozygous missense (p.Pro290His) and nonsense variants (p.Gln139Ter), compound heterozygous variants (p.Ser309Ter/p.Val298Ala) and a large homozygous duplication that covered the *TECRL* gene (the effect of this variant on *TECRL* gene expression is unknown and the scoring was downgraded accordingly) (Mosku-Gregor et al, 2020, PMID:32173957). These cases presented with phenotypic features typical of CPVT, including exercise and emotion induced syncope and cardiac arrest and ventricular arrhythmias during exercise testing. A mild prolonged QT interval was observed in several cases, especially after stimulation by epinephrine or exercise, although overall the phenotypes are much more typical of CPVT than LQTS. The association of *TECRL* with CPVT is also supported by experimental evidence with clear functional effects observed in iPSC derived cardiomyocytes generated from a patient with the homozygous c.331+1G>A variant. In summary, *TECRL* variants are definitively associated with autosomal recessive CPVT. Note: All CPVT genes were curated by 3 separate blinded teams. The evidence and scores reached by these 3 teams was reviewed by the CPVT Gene Curation Expert Panel (GCEP). The classification and summary presented here is the conclusion of this GCEP's analysis according to evidence teams' efforts. This classification was approved by the ClinGen Catecholaminergic Polymorphic Ventricular Tachycardia Gene Curation Expert Panel on 20<sup>th</sup> January, 2021 (SOP Version 7).

#### **CALM1 - autosomal dominant CPVT – MODERATE**

*CALM1* was evaluated for autosomal dominant catecholaminergic polymorphic ventricular tachycardia (CPVT). The *CALM1* gene is located on chromosome 14 and encodes for calmodulin 1, a 149 amino acid protein that is identical in sequence to two other calmodulin genes (*CALM2* on chromosome 2 and *CALM3* on chromosome 19). All three CALM genes have been classified as Definitive for Long QT syndrome by the LQTS Gene Curation Expert Panel, noting that these genes tend to be associated with atypical features of LQTS (presentation in infancy or early childhood and with heart block and severe QT prolongation). The CALM genes have also been associated with CPVT phenotypes although less evidence has thus far been published for CPVT compared to LQTS. Evidence

for the association of CALM genes to CPVT comes from the International Calmodulin Registry study (Crotti et al, 2019, PMID:31170290) and other genetic and experimental studies. Genetic evidence for *CALM1* comes from a study that described familial CPVT cases. The p.Asn54Ile variant segregated with disease in a large family pedigree (Nyegaard et al, 2012, PMID:23040497), with a second family with this variant described in the Registry (Crotti et al, 2019, PMID:31170290). The p.Asn98Ser variant occurred de novo in a proband with CPVT (Nyegaard et al, 2012, PMID:23040497) - the same p.Asn98Ser variant was detected de novo in *CALM2* in a CPVT patient (Jiménez-Jáimez et al, 2016, PMID:27100291). These variants have also been studied experimentally and shown to cause CPVT-like phenotypes in zebrafish (Sondergaard et al, 2015, PMID:25557436) and mouse models (Tsai et al, 2020, PMID:32929985) and in non-patient cellular assays (Hwang et al, 2014, PMID:24563457; Søndergaard et al, 2015, PMID:26309258). A family with the *CALM1* p.Ile53Val variant has also been investigated in Toronto (as yet unpublished and therefore not scored during this curation). The affected father and two children carried the variant - all had structurally normal hearts and PVCs during exercise and the children suffered cardiac arrests at the ages of 12 while swimming and 18 while dancing (no other relevant variants were found in a broad 147 gene panel). Based on this genetic and experimental evidence, *CALM1* scored with moderate evidence of association with CPVT. However, the expert panel unanimously agreed that, despite this classification and the modest amount of published evidence linking *CALM1* variants with a CPVT phenotype, all three CALM genes have unequivocal evidence for causation of isolated CPVT, in addition to LQTS and hybrid phenotypes. The three CALM genes encode for identical proteins which are all expressed in heart tissue, and multiple identical variants in two or more of the CALM genes have been shown to cause the same phenotypes, e.g. the de novo variant p.Asp130Gly has been shown in all 3 CALM genes to provoke LQTS in children, which demonstrates the functional similarity of these genes/proteins. Collectively, the three CALM genes would have strong/definitive evidence for association with CPVT. *CALM1* has previously been classified as a definitive gene for atypical LQTS, unambiguously demonstrating the pathogenicity of this gene for inherited arrhythmia syndromes. Finally, as described above, multiple patients with *CALM1* variants have been shown to present with a classical CPVT phenotype. Therefore this gene should be included in CPVT genetic testing panels. Note: All CPVT genes were curated by 3 separate blinded teams. The evidence and scores reached by these 3 teams was reviewed by the CPVT Gene Curation Expert Panel (GCEP). The classification and summary presented here is the conclusion of this GCEP's analysis according to evidence teams' efforts. This classification was approved by the ClinGen Catecholaminergic Polymorphic Ventricular Tachycardia Gene Curation Expert Panel on 20<sup>th</sup> January, 2021 (SOP Version 7).

#### ***CALM2* - autosomal dominant CPVT – MODERATE**

*CALM2* was evaluated for autosomal dominant catecholaminergic polymorphic ventricular tachycardia (CPVT). The *CALM1* gene is located on chromosome 2 and encodes for calmodulin 2, a 149 amino acid protein that is identical in sequence to two other calmodulin genes (*CALM1* on chromosome 14 and *CALM3* on chromosome 19). All three CALM genes have been classified as Definitive for Long QT syndrome by the LQTS Gene Curation Expert Panel, noting that these genes tend to be associated with atypical features of LQTS (presentation in infancy or early childhood and with heart block and severe QT prolongation). The CALM genes have also been associated with CPVT phenotypes although less evidence has thus far been published for CPVT compared to LQTS. Evidence for the association of CALM genes to CPVT comes from the International Calmodulin Registry study (Crotti et al, 2019, PMID:31170290) and other genetic and experimental studies. Genetic evidence for the association of *CALM2* with CPVT comes from two apparently de novo cases with the p.Glu46Lys

variant in the Registry (Crotti et al, 2019, PMID:31170290). Another de novo case was described with the p.Asn98Ser variant (Jiménez-Jáimez et al, 2016, PMID:27100291) - the same p.Asn98Ser variant was detected de novo in *CALM1* in a CPVT patient (Nyegaard et al, 2012, PMID:23040497). A de novo case with the p.Asp132Glu variant was detected in a patient with mixed features of CPVT and LQTS and was therefore scored less than the default (Makita et al, 2014, PMID:24917665) - the same p.Asp132Glu variant was also detected de novo in *CALM3* in a CPVT patient (Crotti et al, 2019, PMID:31170290). As the p.Asn98Ser variant was also observed in *CALM1* in a CPVT case, the experimental evidence demonstrating a CPVT phenotype for this variant from zebrafish models (Sondergaard et al, 2015, PMID:25557436) and non-patient cellular assays (Søndergaard et al, 2015, PMID:26309258) is also relevant for supporting the association of *CALM2* with CPVT. Based on this genetic and experimental evidence, *CALM2* scored with moderate evidence of association with CPVT. However, the expert panel unanimously agreed that, despite this classification and the modest amount of published evidence linking *CALM2* variants with a CPVT phenotype, all three *CALM* genes have unequivocal evidence for causation of isolated CPVT, in addition to LQTS and hybrid phenotypes. The three *CALM* genes encode for identical proteins which are all expressed in heart tissue, and multiple identical variants in two or more of the *CALM* genes have been shown to cause the same phenotypes, e.g. the de novo variant p.Asp130Gly has been shown in all 3 *CALM* genes to provoke LQTS in children, which demonstrates the functional similarity of these genes/proteins. Collectively, the three *CALM* genes would have strong/definitive evidence for association with CPVT. *CALM2* has previously been classified as a definitive gene for atypical LQTS, unambiguously demonstrating the pathogenicity of this gene for inherited arrhythmia syndromes. Finally, as described above, multiple patients with *CALM2* variants have been shown to present with a classical CPVT phenotype. Therefore this gene should be included in CPVT genetic testing panels. Note: All CPVT genes were curated by 3 separate blinded teams. The evidence and scores reached by these 3 teams was reviewed by the CPVT Gene Curation Expert Panel (GCEP). The classification and summary presented here is the conclusion of this GCEP's analysis according to evidence teams' efforts. This classification was approved by the ClinGen Catecholaminergic Polymorphic Ventricular Tachycardia Gene Curation Expert Panel on 20<sup>th</sup> January, 2021 (SOP Version 7).

### ***CALM3* - autosomal dominant CPVT - LIMITED upgraded to MODERATE**

*CALM3* was evaluated for autosomal dominant catecholaminergic polymorphic ventricular tachycardia (CPVT). The *CALM3* gene is located on chromosome 19 and encodes for calmodulin 3, a 149 amino acid protein that is identical in sequence to two other calmodulin genes (*CALM1* on chromosome 14 and *CALM2* on chromosome 2). All three *CALM* genes have been classified as Definitive for Long QT syndrome by the LQTS Gene Curation Expert Panel, noting that these genes tend to be associated with atypical features of LQTS (presentation in infancy or early childhood and with heart block and severe QT prolongation). The *CALM* genes have also been associated with CPVT phenotypes although less evidence has thus far been published for CPVT compared to LQTS. Evidence for the association of *CALM* genes to CPVT comes from the International Calmodulin Registry study (Crotti et al, 2019, PMID:31170290) and other genetic and experimental studies. Genetic evidence for the association of *CALM3* with CPVT comes from an apparently de novo case in the Registry with the p.Asp132Glu variant - the same variant in the *CALM2* gene was also detected de novo in a patient with mixed features of CPVT and LQTS (Crotti et al, 2019, PMID:31170290). The p.Ala103Val variant was detected in a CPVT patient with its pathogenicity supported by functional evidence (Gomez-Hurtado et al, 2016, PMID:27516456). Based on this genetic and experimental evidence, *CALM3* scored with limited evidence of association with CPVT but was upgraded to a Moderate classification by the expert

panel. However, the expert panel unanimously agreed that, despite this classification and the modest amount of published evidence linking *CALM3* variants with a CPVT phenotype, all three *CALM* genes have unequivocal evidence for causation of isolated CPVT, in addition to LQTS and hybrid phenotypes. The three *CALM* genes encode for identical proteins which are all expressed in heart tissue, and multiple identical variants in two or more of the *CALM* genes have been shown to cause the same phenotypes, e.g. the de novo variant p.Asp130Gly has been shown in all 3 *CALM* genes to provoke LQTS in children, which demonstrates the functional similarity of these genes/proteins. Collectively, the three *CALM* genes would have strong/definitive evidence for association with CPVT. *CALM3* has previously been classified as a definitive gene for atypical LQTS, unambiguously demonstrating the pathogenicity of this gene for inherited arrhythmia syndromes. Finally, as described above, multiple patients with *CALM3* variants have been shown to present with a classical CPVT phenotype. Therefore this gene should be included in CPVT genetic testing panels. Note: All CPVT genes were curated by 3 separate blinded teams. The evidence and scores reached by these 3 teams was reviewed by the CPVT Gene Curation Expert Panel (GCEP). The classification and summary presented here is the conclusion of this GCEP's analysis according to evidence teams' efforts. This classification was approved by the ClinGen Catecholaminergic Polymorphic Ventricular Tachycardia Gene Curation Expert Panel on 20<sup>th</sup> January, 2021 (SOP Version 7).

#### ***ANK2* - autosomal dominant CPVT – LIMITED downgraded to DISPUTED**

*ANK2* was evaluated for autosomal dominant catecholaminergic polymorphic ventricular tachycardia (CPVT). *ANK2*, which encodes the ankyrin B protein, has been implicated in a number of arrhythmia phenotypes but has been classified as Disputed for both Brugada syndrome and Long QT syndrome by the respective Gene Curation Expert Panels. Variants in *ANK2* have been detected in 3 patients/families with CPVT-like symptoms (Mohler et al, 2004, PMID:15178757; Mohler et al, 2007, PMID:17242276). However the population frequencies of these variants are too high to be an autosomal dominant cause of CPVT – p.Leu1622Ile (gnomAD max MAF = 0.034), p.Arg1788Trp (gnomAD max MAF = 0.002) and p.Val1516Asp (gnomAD max MAF = 0.004). AnkB heterozygous null mice have been shown to display exercise and epinephrine-induced polymorphic ventricular arrhythmias before death (Mohler et al, 2003, PMID:12571597). While this phenotype can be rescued with transfection of wild type ankyrin-B, mutant ankyrin-B with the human arrhythmia-associated variants described above (and variants associated with other arrhythmias) were unable to rescue this phenotype (Mohler et al, 2004, PMID:15178757; Mohler et al, 2007, PMID:17242276). Nevertheless, despite this experimental evidence, there is no convincing human genetic evidence to associate *ANK2* as an autosomal dominant cause of CPVT and therefore this gene has been classified as Disputed. Note: All CPVT genes were curated by 3 separate blinded teams. The evidence and scores reached by these 3 teams was reviewed by the CPVT Gene Curation Expert Panel (GCEP). The classification and summary presented here is the conclusion of this GCEP's analysis according to evidence teams' efforts. This classification was approved by the ClinGen Catecholaminergic Polymorphic Ventricular Tachycardia Gene Curation Expert Panel on 20<sup>th</sup> January, 2021 (SOP Version 7).

#### ***KCNJ2* - autosomal dominant CPVT - LIMITED downgraded to DISPUTED**

*KCNJ2* was evaluated for autosomal dominant catecholaminergic polymorphic ventricular tachycardia (CPVT). Variants in *KCNJ2* are associated with Andersen-Tawil syndrome (ATS), a condition associated with dysmorphic features, periodic paralysis and prominent U waves on ECG. It has been classified as

a definitive gene for ATS by the LQTS Gene Curation Expert Panel. As the ECG abnormalities in patients with *KCNJ2* variants can be interpreted as prolonged QT intervals, it was also curated for isolated LQTS and found to have limited evidence. *KCNJ2* variants have also been implicated in CPVT (referred to as CPVT3 in early reports). However, as in the case with isolated LQTS, it is unclear if these reports actually represent atypical presentations of ATS without extra-cardiac features. A number of reports describe patients with *KCNJ2* variants presenting with CPVT-like arrhythmogenic symptoms and without any extra-cardiac features (Tester et al, 2006, PMID:16818210; Kimura et al, 2012, PMID:22589293; Kalscheur et al, 2014, PMID:24561538), supported by functional studies demonstrating effects of the variants on IK1 current in cellular assays (Vega et al, 2009, PMID:19843922; Kimura et al, 2012, PMID:22589293; Kalscheur et al, 2014, PMID:24561538). As a consequence, *KCNJ2* scored with limited evidence for involvement in CPVT based on these reports. However, none of these patients presented unequivocally with a classical CPVT phenotype and demonstrated features such as subtle ECG U wave abnormalities and bidirectional VT at rest which may be suggestive of atypical and cardiac-specific ATS rather than a true CPVT diagnosis. The expert panel therefore agreed to classify *KCNJ2* as Disputed for CPVT. As patients with pathogenic *KCNJ2* variants may present with a phenotype that can resemble typical features of CPVT, it may be beneficial to include this gene in extended arrhythmia genetic testing panels for patients with a CPVT-like phenotype if no causative variants are found when sequencing validated CPVT genes. However, any detected variants should be interpreted in the context of the known genotype-phenotype relationships for *KCNJ2*, in particular by investigating for subtle phenotypic features associated with ATS. Note: All CPVT genes were curated by 3 separate blinded teams. The evidence and scores reached by these 3 teams was reviewed by the CPVT Gene Curation Expert Panel (GCEP). The classification and summary presented here is the conclusion of this GCEP's analysis according to evidence teams' efforts. This classification was approved by the ClinGen Catecholaminergic Polymorphic Ventricular Tachycardia Gene Curation Expert Panel on 20<sup>th</sup> January, 2021 (SOP Version 7).

#### ***PKP2* - autosomal dominant CPVT - LIMITED downgraded to DISPUTED**

*PKP2* was evaluated for autosomal dominant catecholaminergic polymorphic ventricular tachycardia (CPVT). Variants in *PKP2* (in particular truncating loss of function variants) are associated with arrhythmogenic cardiomyopathy (ACM/ARVC) and it has been classified as a Definitive gene by the ARVC Gene Curation Expert Panel. The evidence for a role of *PKP2* variants in CPVT comes from a single study in which *PKP2* was sequenced in a cohort of 18 patients that had been diagnosed with CPVT and were negative for variants in established CPVT genes (in addition to 19 sudden cardiac death cases with structurally normal hearts) (Tester et al, 2019, PMID:30678776). Although truncating variants in *PKP2* were detected in 6 cases, the expert panel (and indeed the authors of the paper) believed that these patients were likely to have concealed ARVC and had been diagnosed with CPVT due to exercise-associated arrhythmias prior to structural heart changes. Indeed one of these cases was subsequently diagnosed with ARVC and right ventricular structural changes were subsequently observed in two others. A cardiomyocyte-specific *PKP2* mouse knockout model displayed similar phenotypes, with isoproterenol triggered polymorphic ventricular arrhythmias mimicking CPVT observed prior to structural changes (Cerrone et al, 2017, PMID:28740174). In conclusion, we believe that *PKP2* variants are not associated with CPVT and therefore the expert panel decided to classify *PKP2* as disputed for CPVT. However, as a CPVT-like phenotype can be observed in ARVC patients with truncating *PKP2* variants (during the concealed cardiomyopathy phase of the disease), it may be beneficial to include this gene in extended arrhythmia genetic testing panels for patients with a CPVT-like phenotype if no causative variants are found when sequencing validated CPVT genes. If truncating

variants in *PKP2* are detected in such cases, it would suggest a diagnosis of ARVC. Note: All CPVT genes were curated by 3 separate blinded teams. The evidence and scores reached by these 3 teams was reviewed by the CPVT Gene Curation Expert Panel (GCEP). The classification and summary presented here is the conclusion of this GCEP's analysis according to evidence teams' efforts. This classification was approved by the ClinGen Catecholaminergic Polymorphic Ventricular Tachycardia Gene Curation Expert Panel on 20<sup>th</sup> January, 2021 (SOP Version 7).

#### ***SCN5A* - autosomal dominant CPVT - LIMITED downgraded to DISPUTED**

*SCN5A* was evaluated for autosomal dominant catecholaminergic polymorphic ventricular tachycardia (CPVT). Variants in *SCN5A*, encoding the Nav1.5 sodium channel, are associated with a number of arrhythmia phenotypes including Brugada syndrome (loss of function variants) and Long QT syndrome (gain of function variants) for both of which *SCN5A* has previously been classified as a Definitive gene. The evidence for a role of *SCN5A* variants in CPVT comes from a single study in a large Finnish pedigree where the p.Ile141Val was found to segregate with a phenotype of exercise-induced polymorphic ventricular arrhythmias (LOD score = 3.56) with the effect of the variant confirmed by functional studies in HEK293 cells (Swan et al, 2014, PMID:25210054). Based on this study, *SCN5A* scored with limited evidence for association with CPVT. However, the clinical presentations in this family are atypical of a classical CPVT phenotype. While affected individuals presented with premature ventricular complexes and non-sustained polymorphic ventricular tachycardia after exercise in a similar manner to other CPVT patients (but also abundantly at rest in some), some also displayed atrial flutter and ectopic atrial rhythm that are not typical of CPVT. The expert panel therefore agreed to classify *SCN5A* as Disputed for CPVT. As patients with pathogenic *SCN5A* variants may present with a phenotype that can resemble some typical features of CPVT, it may be beneficial to include this gene in extended arrhythmia genetic testing panels for patients with a CPVT-like phenotype if no causative variants are found when sequencing validated CPVT genes. Any variants detected should be interpreted with caution however and in the context of the phenotypes of the patient being tested and those associated with *SCN5A*, in particular the phenotypes described by Swan et al. Note: All CPVT genes were curated by 3 separate blinded teams. The evidence and scores reached by these 3 teams was reviewed by the CPVT Gene Curation Expert Panel (GCEP). The classification and summary presented here is the conclusion of this GCEP's analysis according to evidence teams' efforts. This classification was approved by the ClinGen Catecholaminergic Polymorphic Ventricular Tachycardia Gene Curation Expert Panel on 20<sup>th</sup> January, 2021 (SOP Version 7).

## SQTS

### ***CACNA1C***

*CACNA1C* encodes for the alpha-1c subunit of the voltage-dependent L-type calcium channel which is important for the development of the action potential in human cardiomyocytes. Genetic variants in this gene have been identified in 5 probands with suggested SQTS phenotype. Three of these probands, however, had Brugada syndrome with a relatively short QT interval (PMIDs 17224476, 20817017) and one had hypertrophic cardiomyopathy without a convincing SQTS phenotype (PMID 28427417). Accordingly, the Expert Panel decided these patients did not have an isolated SQTS phenotype and the genetic evidence derived from these cases should not be scored toward relationship of *CACNA1C* with SQTS. The final proband was identified as having a de novo variant (PMID 24291113), however, the gnomAD MAF was regarded as too high for a rare condition such as SQTS and there was no other evidence supporting this variant's impact. Therefore, the Expert Panel classified the relationship of *CACNA1C* with SQTS as 'Disputed'.

### ***CACNA2D1***

*CACNA2D1* encodes the alpha-2/delta-1 subunit of the calcium voltage-gated channel. A genetic variant in this gene was identified using a candidate-gene approach in a single case with cardiac arrest and a short QT interval (PMID 21383000). Other family members carrying this variant did not have a SQTS phenotype. Furthermore, this variant is now known to be present in >1% of Ashkenazi Jewish alleles, ruling it out as a monogenic cause of SQTS. In the absence of other genetic data, *CACNA2D1* was classified as 'Disputed'.

### ***CACNB2***

*CACNB2* encodes a beta subunit of the calcium voltage-gated channel. The relationship of this gene with SQTS is based on a single report which used a candidate-gene approach in patients with Brugada syndrome and a short QT interval (PMID 17224476). Because the proband identified as carrying the rare genetic variant (ClinVar Variation ID# 9547) had a positive ajmaline test, his phenotype was regarded by the Expert Panel to be concordant with Brugada syndrome and not SQTS. Therefore, the Expert Panel classified the relationship of this gene with SQTS as 'Disputed'.

### ***KCNH2***

*KCNH2* encodes the alpha subunit of the rapidly activating delayed rectifier cardiac potassium channel (I<sub>Kr</sub>). Brugada et al. (PMID 14676148) were the first to identify 2 rare *KCNH2* missense variants leading to the same amino-acid change (p.Asn588Lys, ClinVar Variation ID# 14436 & 14437) in 2 small families with Short QT Syndrome (SQTS) using a candidate-gene approach. This genetic evidence was subsequently supported by multiple other publications identifying rare missense *KCNH2* variants in SQTS patients. Experimental evidence derived from non-patient cells, human-induced pluripotent stem cell-derived cells and a rabbit animal model (PMID 30496390) all support this gene's relationship with SQTS. These experimental studies demonstrate that genetic variants identified in SQTS patients lead to potassium current perturbations concordant with SQTS phenotype and shortening of the QT



interval. It is noteworthy that of the 18 probands with SQTS in whom *KCNH2* variants were identified, 13 had one of 2 variants; 7 with p.Thr618Ile variant (ClinVar Variation ID# 67297) and 6 with p.Asn588Lys.

### ***KCNJ2***

*KCNJ2* encodes the alpha subunit of  $I_{K1}$ , the inward rectifier cardiac potassium channel. Variants in *KCNJ2* have been identified in 6 patients from 5 families with unique variants, including at least 2 probands with a de-novo variant. Experimental evidence demonstrated these variants lead to gain-of-function of the late repolarizing, *KCNJ2*-encoded  $I_{K1}$  current in the heart, and abbreviation of the action potential duration (PMID 15761194). These data were considered sufficient for classifying the gene-disease relationship of *KCNJ2* as 'Moderate' but, in the absence of segregation or case-control data, the genetic evidence was not abundant enough for a stronger classification.

### ***KCNQ1***

*KCNQ1* encodes the alpha subunit of the slowly activating delayed rectifier cardiac potassium channel ( $I_{Ks}$ ). Bellocq et al. were the first to identify a rare *KCNQ1* missense variant (p.Val180Leu ClinVar Variation ID#3148) in a patient with SQTS (PMID 15159330). Subsequently, 8 other probands with SQTS were found to carry another variant (p.Val141Met, ClinVar Variation ID#67072). Interestingly, all of these 8 cases presented with severe bradycardia in-utero or at birth and in 6 atrial fibrillation was also documented (PMIDs 24818999, 26279191, 16109388, 24380499, 25974115, 28491547). Importantly, in none of the p.Val141Met cases was cardiac arrest or SCD described. In fact, cardiac arrest was described only in the first case described by Bellocq et al. In 3 cases the p.Val141Met variant was demonstrated to be de-novo although paternity was not proven in all. In another 4 cases no other family members were diagnosed and in one family the father of the proband was identified with the p.Val141Met variant and demonstrated a mild phenotype. The fact that almost all genetic evidence was derived from a single variant led the Expert Panel to limit the classification of *KCNQ1* as a SQTS-causing gene to "Strong", despite evidence being reproducible over time.

### ***SCN5A***

*SCN5A* encodes the alpha subunit of the cardiac voltage-gated sodium channel. Genetic evidence supporting its relationship with SQTS is derived from a single case in which a rare *SCN5A* variant was discovered (PMID 22490985). The patient, however, had a type 1 Brugada pattern with a relatively short QT interval and the Expert Panel regarded this phenotype as being concordant with Brugada syndrome and not SQTS. In the absence of additional genetic evidence this gene was classified as 'Disputed'.

### ***SLC4A3***

*SLC4A3* encodes a plasma membrane anion exchange protein. Genetic evidence supporting *SLC4A3* as a SQTS-causing gene is derived from a single publication in which exome sequencing was performed in 2 families, including one large pedigree (PMID 29167417). The same rare genetic variant (p.Arg370His, c.1109G>A) was identified in both families, suggesting they are possibly distantly

related. Experimental evidence from in vitro and zebrafish models suggests reduced membrane localization of the mutated protein leads to intracellular alkalinization and shortening of the cardiomyocyte action potential duration. The genetic evidence, including the unbiased gene discovery approach of whole exome sequencing and segregation of the identified genetic variant with a large number of affected individuals within the presented pedigree, was considered strong. However, lack of other publications supporting this gene-disease relationship led to a score in the moderate range using the gene curation template. The Expert Panel discussed upgrading the final classification but was divided on this issue with 4 panellists voting for 'strong' and 5 for 'moderate'.

### ***SLC22A5***

*SLC22A5* encodes a sodium ion-dependent, high affinity carnitine transporter protein. Genetic variants in this gene cause primary systemic carnitine deficiency, an autosomal recessive disorder. Homozygote or compound heterozygote variants in *SLC22A5* have been identified in unexplained SCD or resuscitated cardiac arrest cases with abbreviation of the QT interval and without overt extra-cardiac manifestations (PMIDs 26190315, 31472821). Because the QT interval abbreviation was reversible by oral carnitine supplementation, the Expert Panel viewed this gene as a SQTS-mimic but as a cause of true SQTS classified it as 'Disputed'.

# Gene Classification Matrices - CPVT

RYR2

| Genetic Evidence Summary                               |                                                                    |                                                                      |                                                                 |                           |                           |                                                       |               |           |           | References                                                                                                                                   |                                |                                       |                                                                      |
|--------------------------------------------------------|--------------------------------------------------------------------|----------------------------------------------------------------------|-----------------------------------------------------------------|---------------------------|---------------------------|-------------------------------------------------------|---------------|-----------|-----------|----------------------------------------------------------------------------------------------------------------------------------------------|--------------------------------|---------------------------------------|----------------------------------------------------------------------|
| Case-Level Data                                        | Evidence Type                                                      |                                                                      | Case Information                                                |                           |                           | Suggested points/case                                 |               | G1        | G2        | G3                                                                                                                                           | Max Score                      |                                       |                                                                      |
|                                                        | Variant Evidence                                                   |                                                                      |                                                                 |                           |                           | Default                                               | Range         |           |           |                                                                                                                                              |                                |                                       |                                                                      |
|                                                        |                                                                    |                                                                      | Autosomal dominant disease, OR X-linked disease, affected males | Variant is <i>de novo</i> |                           |                                                       | 2             | 0-3       | 12        | 14                                                                                                                                           | 12                             | 12                                    | Priori et al 2001 (PMID:11208676); Priori et al 2002 (PMID:12093772) |
|                                                        | Proband with predicted or proven null variant                      |                                                                      |                                                                 | 1.5                       | 0-2                       | 0                                                     | 0             | 2         | 10        |                                                                                                                                              |                                |                                       |                                                                      |
|                                                        | Proband with other variant type with some evidence of gene impact  |                                                                      |                                                                 | 0.5                       | 0-1.5                     | 0                                                     | 0.5           | 6.5       | 7         |                                                                                                                                              |                                |                                       |                                                                      |
|                                                        | Autosomal recessive disease, OR X-linked disease, affected females | Two variants in <i>trans</i> , at least one is LOF or <i>de novo</i> |                                                                 |                           | 2                         | 0-3                                                   | 0             | 0         | 0         | 12                                                                                                                                           |                                |                                       |                                                                      |
|                                                        |                                                                    | Two non-LOF variants in <i>trans</i>                                 |                                                                 |                           | 1                         | 0-1.5                                                 | 0             | 0         | 0         | 0                                                                                                                                            |                                |                                       |                                                                      |
|                                                        | Segregation Evidence                                               | Evidence of Segregation in one or more families                      |                                                                 |                           | Sequencing Method         |                                                       | 0-3           | 3         | 1.5       | 1.5                                                                                                                                          | 3                              | Wangüemert et al 2015 (PMID:25814417) |                                                                      |
| Total LOD Score                                        |                                                                    |                                                                      |                                                                 |                           | Candidate Gene Sequencing | Exome/Genome or all genes sequenced in linkage region |               |           |           |                                                                                                                                              |                                |                                       |                                                                      |
|                                                        |                                                                    |                                                                      |                                                                 |                           | 2-2.99                    | 0.5                                                   |               |           |           |                                                                                                                                              |                                |                                       | 1                                                                    |
|                                                        |                                                                    |                                                                      |                                                                 |                           | 3-4.99                    | 1                                                     |               |           |           |                                                                                                                                              |                                |                                       | 2                                                                    |
|                                                        |                                                                    |                                                                      |                                                                 |                           | ≥5                        | 1.5                                                   |               |           |           |                                                                                                                                              |                                |                                       | 3                                                                    |
| Case-Control Data                                      | Case-Control Study Type                                            |                                                                      | Case-Control Quality Criteria                                   |                           |                           | Suggested points/study                                |               | G2        | G3        | G1                                                                                                                                           | Max Score                      | Kapplinger et al 2018 (PMID:29453246) |                                                                      |
|                                                        | Single Variant Analysis                                            |                                                                      | Variant Detection Methodology<br>Power                          |                           |                           | 0-6                                                   |               | 0         | 0         | 0                                                                                                                                            | 12                             |                                       |                                                                      |
|                                                        | Aggregate Variant Analysis                                         |                                                                      | Bias and Confounding Factors<br>Statistical Significance        |                           |                           | 0-6                                                   |               | 0         | 0         | 0                                                                                                                                            | 0                              |                                       |                                                                      |
| <b>Total Genetic Evidence Points (Maximum 12):</b>     |                                                                    |                                                                      |                                                                 |                           |                           |                                                       | 12            | 12        | 12        | 12                                                                                                                                           |                                |                                       |                                                                      |
| Experimental Evidence Summary                          |                                                                    |                                                                      |                                                                 |                           |                           |                                                       |               |           |           |                                                                                                                                              |                                |                                       |                                                                      |
| Evidence Category                                      |                                                                    | Evidence Type                                                        |                                                                 |                           | Suggested points/item     |                                                       | G1            | G2        | G3        | Max Score                                                                                                                                    |                                |                                       |                                                                      |
|                                                        |                                                                    |                                                                      |                                                                 |                           | Default                   | Range                                                 |               |           |           |                                                                                                                                              |                                |                                       |                                                                      |
| Function                                               | Biochemical Function                                               |                                                                      |                                                                 | 0.5                       | 0-2                       | 0.5                                                   | 0             | 0         | 0         | 2                                                                                                                                            | Otsu et al 1990 (PMID:2380170) |                                       |                                                                      |
|                                                        | Protein Interaction                                                |                                                                      |                                                                 | 0.5                       | 0-2                       | 0                                                     | 0             | 0         | 0         |                                                                                                                                              |                                |                                       |                                                                      |
|                                                        | Expression                                                         |                                                                      |                                                                 | 0.5                       | 0-2                       | 0                                                     | 0             | 0         | 0         |                                                                                                                                              |                                |                                       |                                                                      |
| Functional Alteration                                  | Patient Cells                                                      |                                                                      |                                                                 | 1                         | 0-2                       | 0                                                     | 1             | 0         | 2         | Wangüemert et al 2015 (PMID:25814417); George et al 2003 (PMID:12919952); Loaiza et al 2013 (PMID:23152493); Zhao et al 2014 (PMID:25775566) |                                |                                       |                                                                      |
|                                                        | Non-Patient Cells                                                  |                                                                      |                                                                 | 0.5                       | 0-1                       | 1.5                                                   | 2             | 2         |           |                                                                                                                                              |                                |                                       |                                                                      |
| Models                                                 | Non-human model organism                                           |                                                                      |                                                                 | 2                         | 0-4                       | 3                                                     | 6             | 4         | 4         | Cerrone et al 2005 (PMID:15890976); Kannankeril et al 2006 (PMID:16873551); Loaiza et al 2013 (PMID:23152493)                                |                                |                                       |                                                                      |
|                                                        | Cell culture model                                                 |                                                                      |                                                                 | 1                         | 0-2                       | 0                                                     | 0             | 0         |           |                                                                                                                                              |                                |                                       |                                                                      |
| Rescue                                                 | Rescue in human                                                    |                                                                      |                                                                 | 2                         | 0-4                       | 0                                                     | 0             | 0         | 4         | Pan et al 2018 (PMID:30355031)                                                                                                               |                                |                                       |                                                                      |
|                                                        | Rescue in non-human model organism                                 |                                                                      |                                                                 | 2                         | 0-4                       | 2                                                     | 2             | 0         |           |                                                                                                                                              |                                |                                       |                                                                      |
|                                                        | Rescue in cell culture model                                       |                                                                      |                                                                 | 1                         | 0-2                       | 0                                                     | 0             | 0         |           |                                                                                                                                              |                                |                                       |                                                                      |
|                                                        | Rescue in Patient Cells                                            |                                                                      |                                                                 | 1                         | 0-2                       | 0                                                     | 0             | 0         |           |                                                                                                                                              |                                |                                       |                                                                      |
| <b>Total Experimental Evidence Points (Maximum 6):</b> |                                                                    |                                                                      |                                                                 |                           |                           |                                                       | 6             | 6         | 6         | 6                                                                                                                                            |                                |                                       |                                                                      |
|                                                        |                                                                    |                                                                      |                                                                 |                           |                           |                                                       | <b>Total:</b> | <b>18</b> | <b>18</b> | <b>18</b>                                                                                                                                    |                                |                                       |                                                                      |

CASQ2 (autosomal recessive)

| Genetic Evidence Summary                               |                                                                    |                                                                      |                                                          |                           |                                                       |                        |               |           |           | References                                                                                                   |                                                                                                                             |   |  |
|--------------------------------------------------------|--------------------------------------------------------------------|----------------------------------------------------------------------|----------------------------------------------------------|---------------------------|-------------------------------------------------------|------------------------|---------------|-----------|-----------|--------------------------------------------------------------------------------------------------------------|-----------------------------------------------------------------------------------------------------------------------------|---|--|
| Case-Level Data                                        | Evidence Type                                                      |                                                                      | Case Information                                         |                           |                                                       | Suggested points/case  |               | G1        | G2        | G3                                                                                                           | Max Score                                                                                                                   |   |  |
|                                                        | Variant Evidence                                                   |                                                                      |                                                          |                           | Default                                               | Range                  |               |           |           |                                                                                                              |                                                                                                                             |   |  |
|                                                        | Autosomal dominant disease, OR X-linked disease, affected males    | Variant is <i>de novo</i>                                            |                                                          |                           | 2                                                     | 0-3                    | 0             | 0         | 0         | 12                                                                                                           | Postma et al 2002 (PMID:12386154); Raffaele di Barletta et al 2006 (PMID:16908766); Roux-Buisson et al 2011 (PMID:21618644) |   |  |
|                                                        |                                                                    | Proband with predicted or proven null variant                        |                                                          |                           | 1.5                                                   | 0-2                    | 0             | 0         | 0         | 10                                                                                                           |                                                                                                                             |   |  |
|                                                        |                                                                    | Proband with other variant type with some evidence of gene impact    |                                                          |                           | 0.5                                                   | 0-1.5                  | 0             | 0         | 0         | 7                                                                                                            |                                                                                                                             |   |  |
|                                                        | Autosomal recessive disease, OR X-linked disease, affected females | Two variants in <i>trans</i> , at least one is LOF or <i>de novo</i> |                                                          |                           | 2                                                     | 0-3                    | 10            | 18        | 12        | 12                                                                                                           |                                                                                                                             |   |  |
|                                                        |                                                                    | Two non-LOF variants in <i>trans</i>                                 |                                                          |                           | 1                                                     | 0-1.5                  | 0             | 1         | 0         | 0                                                                                                            |                                                                                                                             |   |  |
| Segregation Evidence                                   | Evidence of Segregation in one or more families                    |                                                                      | Sequencing Method                                        |                           |                                                       | 0-3                    | 2.75          | 0         | 1.5       | 3                                                                                                            | Lahat et al 2004 (PMID:15176429)                                                                                            |   |  |
|                                                        |                                                                    |                                                                      | Total LOD Score                                          | Candidate Gene Sequencing | Exome/Genome or all genes sequenced in linkage region |                        |               |           |           |                                                                                                              |                                                                                                                             |   |  |
|                                                        |                                                                    |                                                                      |                                                          | 2-2.99                    | 0.5                                                   |                        |               |           |           |                                                                                                              |                                                                                                                             | 1 |  |
|                                                        |                                                                    |                                                                      |                                                          | 3-4.99                    | 1                                                     |                        |               |           |           |                                                                                                              |                                                                                                                             | 2 |  |
|                                                        |                                                                    |                                                                      |                                                          | ≥5                        | 1.5                                                   |                        |               |           |           |                                                                                                              |                                                                                                                             | 3 |  |
| Case-Control Data                                      | Case-Control Study Type                                            |                                                                      | Case-Control Quality Criteria                            |                           |                                                       | Suggested points/study |               | G2        | G3        | G1                                                                                                           | Max Score                                                                                                                   |   |  |
|                                                        | Single Variant Analysis                                            |                                                                      | Variant Detection Methodology<br>Power                   |                           |                                                       | 0-6                    |               | 0         | 0         | 0                                                                                                            | 12                                                                                                                          |   |  |
|                                                        | Aggregate Variant Analysis                                         |                                                                      | Bias and Confounding Factors<br>Statistical Significance |                           |                                                       | 0-6                    |               | 0         | 0         | 0                                                                                                            |                                                                                                                             |   |  |
| <b>Total Genetic Evidence Points (Maximum 12):</b>     |                                                                    |                                                                      |                                                          |                           |                                                       |                        | 12            | 12        | 12        | 12                                                                                                           |                                                                                                                             |   |  |
| Experimental Evidence Summary                          |                                                                    |                                                                      |                                                          |                           |                                                       |                        |               |           |           |                                                                                                              |                                                                                                                             |   |  |
| Evidence Category                                      |                                                                    | Evidence Type                                                        |                                                          |                           | Suggested points/item                                 |                        | G1            | G2        | G3        | Max Score                                                                                                    |                                                                                                                             |   |  |
| Function                                               | Biochemical Function                                               |                                                                      |                                                          | 0.5                       | 0-2                                                   | 0.5                    | 0             | 0.5       | 2         | Yano et al 1994 (PMID:7816057)<br>Zhang et al 1997 (PMID:9287354)<br>Fagerberg et al 2014 (PMID: 24309898)   |                                                                                                                             |   |  |
|                                                        | Protein Interaction                                                |                                                                      |                                                          | 0.5                       | 0-2                                                   | 0.5                    | 0             | 0.5       |           |                                                                                                              |                                                                                                                             |   |  |
|                                                        | Expression                                                         |                                                                      |                                                          | 0.5                       | 0-2                                                   | 0.5                    | 0.5           | 1.5       |           |                                                                                                              |                                                                                                                             |   |  |
| Functional Alteration                                  | Patient Cells                                                      |                                                                      |                                                          | 1                         | 0-2                                                   | 0                      | 0             | 0         | 2         | di Barletta et al 2006 (PMID:16908766); Dirksen et al 2007 (PMID:17449018); Rizzi et al 2008 (PMID:18583715) |                                                                                                                             |   |  |
|                                                        | Non-Patient Cells                                                  |                                                                      |                                                          | 0.5                       | 0-1                                                   | 1.5                    | 2.5           | 0.5       |           |                                                                                                              |                                                                                                                             |   |  |
| Models                                                 | Non-human model organism                                           |                                                                      |                                                          | 2                         | 0-4                                                   | 7.5                    | 6             | 5         | 4         | Dirksen et al 2007 (PMID:17449018); Song et al 2007 (PMID:17607358); Rizzi et al 2008 (PMID:18583715)        |                                                                                                                             |   |  |
|                                                        | Cell culture model                                                 |                                                                      |                                                          | 1                         | 0-2                                                   | 0                      | 0             | 0         |           |                                                                                                              |                                                                                                                             |   |  |
| Rescue                                                 | Rescue in human                                                    |                                                                      |                                                          | 2                         | 0-4                                                   | 0                      | 0             | 0         | 4         | Kutzwald Josefson et al 2017 (PMID:28336343)                                                                 |                                                                                                                             |   |  |
|                                                        | Rescue in non-human model organism                                 |                                                                      |                                                          | 2                         | 0-4                                                   | 1                      | 0             | 2         |           |                                                                                                              |                                                                                                                             |   |  |
|                                                        | Rescue in cell culture model                                       |                                                                      |                                                          | 1                         | 0-2                                                   | 0                      | 0             | 0         |           |                                                                                                              |                                                                                                                             |   |  |
|                                                        | Rescue in Patient Cells                                            |                                                                      |                                                          | 1                         | 0-2                                                   | 0                      | 0             | 0         |           |                                                                                                              |                                                                                                                             |   |  |
| <b>Total Experimental Evidence Points (Maximum 6):</b> |                                                                    |                                                                      |                                                          |                           |                                                       |                        | 6             | 6         | 6         | 6                                                                                                            |                                                                                                                             |   |  |
|                                                        |                                                                    |                                                                      |                                                          |                           |                                                       |                        | <b>Total:</b> | <b>18</b> | <b>18</b> | <b>18</b>                                                                                                    |                                                                                                                             |   |  |

CASQ2 (autosomal dominant)

| Genetic Evidence Summary                                                                                                                                                                                                                                                                                                                                                                                                                                                                                                                                                                                                                                                                                                                                                                                                                      |                                                                    |                                                                      |                   |                       |                        |                           |                                                       |            |             | References                                                                                                 |   |                               |                                 |  |                        |  |    |    |    |           |                   |                         |                                        |  |  |     |  |   |   |   |    |                            |                                                          |  |  |     |  |   |   |   |                                                    |  |  |  |  |  |  |      |     |      |    |
|-----------------------------------------------------------------------------------------------------------------------------------------------------------------------------------------------------------------------------------------------------------------------------------------------------------------------------------------------------------------------------------------------------------------------------------------------------------------------------------------------------------------------------------------------------------------------------------------------------------------------------------------------------------------------------------------------------------------------------------------------------------------------------------------------------------------------------------------------|--------------------------------------------------------------------|----------------------------------------------------------------------|-------------------|-----------------------|------------------------|---------------------------|-------------------------------------------------------|------------|-------------|------------------------------------------------------------------------------------------------------------|---|-------------------------------|---------------------------------|--|------------------------|--|----|----|----|-----------|-------------------|-------------------------|----------------------------------------|--|--|-----|--|---|---|---|----|----------------------------|----------------------------------------------------------|--|--|-----|--|---|---|---|----------------------------------------------------|--|--|--|--|--|--|------|-----|------|----|
| Evidence Type                                                                                                                                                                                                                                                                                                                                                                                                                                                                                                                                                                                                                                                                                                                                                                                                                                 | Case Information                                                   |                                                                      |                   | Suggested points/case |                        | G1                        | G2                                                    | G3         | Max Score   |                                                                                                            |   |                               |                                 |  |                        |  |    |    |    |           |                   |                         |                                        |  |  |     |  |   |   |   |    |                            |                                                          |  |  |     |  |   |   |   |                                                    |  |  |  |  |  |  |      |     |      |    |
|                                                                                                                                                                                                                                                                                                                                                                                                                                                                                                                                                                                                                                                                                                                                                                                                                                               | Variant Evidence                                                   |                                                                      |                   | Default               | Range                  |                           |                                                       |            |             |                                                                                                            |   |                               |                                 |  |                        |  |    |    |    |           |                   |                         |                                        |  |  |     |  |   |   |   |    |                            |                                                          |  |  |     |  |   |   |   |                                                    |  |  |  |  |  |  |      |     |      |    |
| Case-Level Data                                                                                                                                                                                                                                                                                                                                                                                                                                                                                                                                                                                                                                                                                                                                                                                                                               | Autosomal dominant disease, OR X-linked disease, affected males    | Variant is <i>de novo</i>                                            |                   | 2                     | 0-3                    | 0                         | 0                                                     | 0          | 12          | Ng et al 2020 (PMID:32693635)                                                                              |   |                               |                                 |  |                        |  |    |    |    |           |                   |                         |                                        |  |  |     |  |   |   |   |    |                            |                                                          |  |  |     |  |   |   |   |                                                    |  |  |  |  |  |  |      |     |      |    |
|                                                                                                                                                                                                                                                                                                                                                                                                                                                                                                                                                                                                                                                                                                                                                                                                                                               |                                                                    | Proband with predicted or proven null variant                        |                   | 1.5                   | 0-2                    | 5                         | 3.2                                                   | 7.5        | 10          |                                                                                                            |   |                               |                                 |  |                        |  |    |    |    |           |                   |                         |                                        |  |  |     |  |   |   |   |    |                            |                                                          |  |  |     |  |   |   |   |                                                    |  |  |  |  |  |  |      |     |      |    |
|                                                                                                                                                                                                                                                                                                                                                                                                                                                                                                                                                                                                                                                                                                                                                                                                                                               |                                                                    | Proband with other variant type with some evidence of gene impact    |                   | 0.5                   | 0-1.5                  | 2.25                      | 2                                                     | 1          | 7           |                                                                                                            |   |                               |                                 |  |                        |  |    |    |    |           |                   |                         |                                        |  |  |     |  |   |   |   |    |                            |                                                          |  |  |     |  |   |   |   |                                                    |  |  |  |  |  |  |      |     |      |    |
|                                                                                                                                                                                                                                                                                                                                                                                                                                                                                                                                                                                                                                                                                                                                                                                                                                               | Autosomal recessive disease, OR X-linked disease, affected females | Two variants in <i>trans</i> , at least one is LOF or <i>de novo</i> |                   | 2                     | 0-3                    | 0                         | 0                                                     | 0          | 12          |                                                                                                            |   |                               |                                 |  |                        |  |    |    |    |           |                   |                         |                                        |  |  |     |  |   |   |   |    |                            |                                                          |  |  |     |  |   |   |   |                                                    |  |  |  |  |  |  |      |     |      |    |
|                                                                                                                                                                                                                                                                                                                                                                                                                                                                                                                                                                                                                                                                                                                                                                                                                                               |                                                                    | Two non-LOF variants in <i>trans</i>                                 |                   | 1                     | 0-1.5                  | 0                         | 0                                                     | 0          |             |                                                                                                            |   |                               |                                 |  |                        |  |    |    |    |           |                   |                         |                                        |  |  |     |  |   |   |   |    |                            |                                                          |  |  |     |  |   |   |   |                                                    |  |  |  |  |  |  |      |     |      |    |
|                                                                                                                                                                                                                                                                                                                                                                                                                                                                                                                                                                                                                                                                                                                                                                                                                                               | Segregation Evidence                                               | Evidence of Segregation in one or more families                      | Sequencing Method |                       | Total LOD score        | Candidate Gene Sequencing | Exome/Genome or all genes sequenced in linkage region | 0-3        | 0           | 2                                                                                                          | 2 | 3                             | Gray et al 2016 (PMID:27157848) |  |                        |  |    |    |    |           |                   |                         |                                        |  |  |     |  |   |   |   |    |                            |                                                          |  |  |     |  |   |   |   |                                                    |  |  |  |  |  |  |      |     |      |    |
| 2-2.99                                                                                                                                                                                                                                                                                                                                                                                                                                                                                                                                                                                                                                                                                                                                                                                                                                        |                                                                    |                                                                      | 0.5               | 1                     |                        |                           |                                                       |            |             |                                                                                                            |   |                               |                                 |  |                        |  |    |    |    |           |                   |                         |                                        |  |  |     |  |   |   |   |    |                            |                                                          |  |  |     |  |   |   |   |                                                    |  |  |  |  |  |  |      |     |      |    |
| 3-4.99                                                                                                                                                                                                                                                                                                                                                                                                                                                                                                                                                                                                                                                                                                                                                                                                                                        |                                                                    |                                                                      | 1                 | 2                     |                        |                           |                                                       |            |             |                                                                                                            |   |                               |                                 |  |                        |  |    |    |    |           |                   |                         |                                        |  |  |     |  |   |   |   |    |                            |                                                          |  |  |     |  |   |   |   |                                                    |  |  |  |  |  |  |      |     |      |    |
| ≥5                                                                                                                                                                                                                                                                                                                                                                                                                                                                                                                                                                                                                                                                                                                                                                                                                                            |                                                                    |                                                                      | 1.5               | 3                     |                        |                           |                                                       |            |             |                                                                                                            |   |                               |                                 |  |                        |  |    |    |    |           |                   |                         |                                        |  |  |     |  |   |   |   |    |                            |                                                          |  |  |     |  |   |   |   |                                                    |  |  |  |  |  |  |      |     |      |    |
| <table border="1"> <thead> <tr> <th colspan="2">Case-Control Study Type</th> <th colspan="3">Case-Control Quality Criteria</th> <th colspan="2">Suggested points/study</th> <th>G2</th> <th>G3</th> <th>G1</th> <th>Max Score</th> </tr> </thead> <tbody> <tr> <td rowspan="2">Case-Control Data</td> <td>Single Variant Analysis</td> <td colspan="3">Variant Detection Methodology<br/>Power</td> <td colspan="2">0-6</td> <td>0</td> <td>0</td> <td>0</td> <td rowspan="2">12</td> </tr> <tr> <td>Aggregate Variant Analysis</td> <td colspan="3">Bias and Confounding Factors<br/>Statistical Significance</td> <td colspan="2">0-6</td> <td>0</td> <td>0</td> <td>0</td> </tr> <tr> <td colspan="7"><b>Total Genetic Evidence Points (Maximum 12):</b></td> <td>7.25</td> <td>7.2</td> <td>10.5</td> <td>12</td> </tr> </tbody> </table> |                                                                    |                                                                      |                   |                       |                        |                           |                                                       |            |             | Case-Control Study Type                                                                                    |   | Case-Control Quality Criteria |                                 |  | Suggested points/study |  | G2 | G3 | G1 | Max Score | Case-Control Data | Single Variant Analysis | Variant Detection Methodology<br>Power |  |  | 0-6 |  | 0 | 0 | 0 | 12 | Aggregate Variant Analysis | Bias and Confounding Factors<br>Statistical Significance |  |  | 0-6 |  | 0 | 0 | 0 | <b>Total Genetic Evidence Points (Maximum 12):</b> |  |  |  |  |  |  | 7.25 | 7.2 | 10.5 | 12 |
| Case-Control Study Type                                                                                                                                                                                                                                                                                                                                                                                                                                                                                                                                                                                                                                                                                                                                                                                                                       |                                                                    | Case-Control Quality Criteria                                        |                   |                       | Suggested points/study |                           | G2                                                    | G3         | G1          | Max Score                                                                                                  |   |                               |                                 |  |                        |  |    |    |    |           |                   |                         |                                        |  |  |     |  |   |   |   |    |                            |                                                          |  |  |     |  |   |   |   |                                                    |  |  |  |  |  |  |      |     |      |    |
| Case-Control Data                                                                                                                                                                                                                                                                                                                                                                                                                                                                                                                                                                                                                                                                                                                                                                                                                             | Single Variant Analysis                                            | Variant Detection Methodology<br>Power                               |                   |                       | 0-6                    |                           | 0                                                     | 0          | 0           | 12                                                                                                         |   |                               |                                 |  |                        |  |    |    |    |           |                   |                         |                                        |  |  |     |  |   |   |   |    |                            |                                                          |  |  |     |  |   |   |   |                                                    |  |  |  |  |  |  |      |     |      |    |
|                                                                                                                                                                                                                                                                                                                                                                                                                                                                                                                                                                                                                                                                                                                                                                                                                                               | Aggregate Variant Analysis                                         | Bias and Confounding Factors<br>Statistical Significance             |                   |                       | 0-6                    |                           | 0                                                     | 0          | 0           |                                                                                                            |   |                               |                                 |  |                        |  |    |    |    |           |                   |                         |                                        |  |  |     |  |   |   |   |    |                            |                                                          |  |  |     |  |   |   |   |                                                    |  |  |  |  |  |  |      |     |      |    |
| <b>Total Genetic Evidence Points (Maximum 12):</b>                                                                                                                                                                                                                                                                                                                                                                                                                                                                                                                                                                                                                                                                                                                                                                                            |                                                                    |                                                                      |                   |                       |                        |                           | 7.25                                                  | 7.2        | 10.5        | 12                                                                                                         |   |                               |                                 |  |                        |  |    |    |    |           |                   |                         |                                        |  |  |     |  |   |   |   |    |                            |                                                          |  |  |     |  |   |   |   |                                                    |  |  |  |  |  |  |      |     |      |    |
| Experimental Evidence Summary                                                                                                                                                                                                                                                                                                                                                                                                                                                                                                                                                                                                                                                                                                                                                                                                                 |                                                                    |                                                                      |                   |                       |                        |                           |                                                       |            |             |                                                                                                            |   |                               |                                 |  |                        |  |    |    |    |           |                   |                         |                                        |  |  |     |  |   |   |   |    |                            |                                                          |  |  |     |  |   |   |   |                                                    |  |  |  |  |  |  |      |     |      |    |
| Evidence Category                                                                                                                                                                                                                                                                                                                                                                                                                                                                                                                                                                                                                                                                                                                                                                                                                             | Evidence Type                                                      |                                                                      |                   | Suggested points/item |                        | G1                        | G2                                                    | G3         | Max Score   |                                                                                                            |   |                               |                                 |  |                        |  |    |    |    |           |                   |                         |                                        |  |  |     |  |   |   |   |    |                            |                                                          |  |  |     |  |   |   |   |                                                    |  |  |  |  |  |  |      |     |      |    |
|                                                                                                                                                                                                                                                                                                                                                                                                                                                                                                                                                                                                                                                                                                                                                                                                                                               |                                                                    |                                                                      |                   | Default               | Range                  |                           |                                                       |            |             |                                                                                                            |   |                               |                                 |  |                        |  |    |    |    |           |                   |                         |                                        |  |  |     |  |   |   |   |    |                            |                                                          |  |  |     |  |   |   |   |                                                    |  |  |  |  |  |  |      |     |      |    |
| Function                                                                                                                                                                                                                                                                                                                                                                                                                                                                                                                                                                                                                                                                                                                                                                                                                                      | Biochemical Function                                               |                                                                      |                   | 0.5                   | 0-2                    | 0.5                       | 0                                                     | 0.5        | 2           | Yano et al 1994 (PMID:7816057)<br>Zhang et al 1997 (PMID:9287354)<br>Fagerberg et al 2014 (PMID: 24309898) |   |                               |                                 |  |                        |  |    |    |    |           |                   |                         |                                        |  |  |     |  |   |   |   |    |                            |                                                          |  |  |     |  |   |   |   |                                                    |  |  |  |  |  |  |      |     |      |    |
|                                                                                                                                                                                                                                                                                                                                                                                                                                                                                                                                                                                                                                                                                                                                                                                                                                               | Protein Interaction                                                |                                                                      |                   | 0.5                   | 0-2                    | 0.5                       | 0                                                     | 0.5        |             |                                                                                                            |   |                               |                                 |  |                        |  |    |    |    |           |                   |                         |                                        |  |  |     |  |   |   |   |    |                            |                                                          |  |  |     |  |   |   |   |                                                    |  |  |  |  |  |  |      |     |      |    |
|                                                                                                                                                                                                                                                                                                                                                                                                                                                                                                                                                                                                                                                                                                                                                                                                                                               | Expression                                                         |                                                                      |                   | 0.5                   | 0-2                    | 0.5                       | 0.5                                                   | 0.5        |             |                                                                                                            |   |                               |                                 |  |                        |  |    |    |    |           |                   |                         |                                        |  |  |     |  |   |   |   |    |                            |                                                          |  |  |     |  |   |   |   |                                                    |  |  |  |  |  |  |      |     |      |    |
| Functional Alteration                                                                                                                                                                                                                                                                                                                                                                                                                                                                                                                                                                                                                                                                                                                                                                                                                         | Patient Cells                                                      |                                                                      |                   | 1                     | 0-2                    | 0                         | 0                                                     | 0          | 2           | di Barletta et al 2006 (PMID:16908766)                                                                     |   |                               |                                 |  |                        |  |    |    |    |           |                   |                         |                                        |  |  |     |  |   |   |   |    |                            |                                                          |  |  |     |  |   |   |   |                                                    |  |  |  |  |  |  |      |     |      |    |
|                                                                                                                                                                                                                                                                                                                                                                                                                                                                                                                                                                                                                                                                                                                                                                                                                                               | Non-Patient Cells                                                  |                                                                      |                   | 0.5                   | 0-1                    | 0.25                      | 1                                                     | 0.5        |             |                                                                                                            |   |                               |                                 |  |                        |  |    |    |    |           |                   |                         |                                        |  |  |     |  |   |   |   |    |                            |                                                          |  |  |     |  |   |   |   |                                                    |  |  |  |  |  |  |      |     |      |    |
| Models                                                                                                                                                                                                                                                                                                                                                                                                                                                                                                                                                                                                                                                                                                                                                                                                                                        | Non-human model organism                                           |                                                                      |                   | 2                     | 0-4                    | 0                         | 0                                                     | 2          | 4           | Chopra et al 2007 (PMID:17656677)                                                                          |   |                               |                                 |  |                        |  |    |    |    |           |                   |                         |                                        |  |  |     |  |   |   |   |    |                            |                                                          |  |  |     |  |   |   |   |                                                    |  |  |  |  |  |  |      |     |      |    |
|                                                                                                                                                                                                                                                                                                                                                                                                                                                                                                                                                                                                                                                                                                                                                                                                                                               | Cell culture model                                                 |                                                                      |                   | 1                     | 0-2                    | 0                         | 0                                                     | 0          |             |                                                                                                            |   |                               |                                 |  |                        |  |    |    |    |           |                   |                         |                                        |  |  |     |  |   |   |   |    |                            |                                                          |  |  |     |  |   |   |   |                                                    |  |  |  |  |  |  |      |     |      |    |
| Rescue                                                                                                                                                                                                                                                                                                                                                                                                                                                                                                                                                                                                                                                                                                                                                                                                                                        | Rescue in human                                                    |                                                                      |                   | 2                     | 0-4                    | 0                         | 0                                                     | 0          | 4           |                                                                                                            |   |                               |                                 |  |                        |  |    |    |    |           |                   |                         |                                        |  |  |     |  |   |   |   |    |                            |                                                          |  |  |     |  |   |   |   |                                                    |  |  |  |  |  |  |      |     |      |    |
|                                                                                                                                                                                                                                                                                                                                                                                                                                                                                                                                                                                                                                                                                                                                                                                                                                               | Rescue in non-human model organism                                 |                                                                      |                   | 2                     | 0-4                    | 0                         | 0                                                     | 0          |             |                                                                                                            |   |                               |                                 |  |                        |  |    |    |    |           |                   |                         |                                        |  |  |     |  |   |   |   |    |                            |                                                          |  |  |     |  |   |   |   |                                                    |  |  |  |  |  |  |      |     |      |    |
|                                                                                                                                                                                                                                                                                                                                                                                                                                                                                                                                                                                                                                                                                                                                                                                                                                               | Rescue in cell culture model                                       |                                                                      |                   | 1                     | 0-2                    | 0                         | 0                                                     | 0          |             |                                                                                                            |   |                               |                                 |  |                        |  |    |    |    |           |                   |                         |                                        |  |  |     |  |   |   |   |    |                            |                                                          |  |  |     |  |   |   |   |                                                    |  |  |  |  |  |  |      |     |      |    |
|                                                                                                                                                                                                                                                                                                                                                                                                                                                                                                                                                                                                                                                                                                                                                                                                                                               | Rescue in Patient Cells                                            |                                                                      |                   | 1                     | 0-2                    | 0                         | 0                                                     | 0          |             |                                                                                                            |   |                               |                                 |  |                        |  |    |    |    |           |                   |                         |                                        |  |  |     |  |   |   |   |    |                            |                                                          |  |  |     |  |   |   |   |                                                    |  |  |  |  |  |  |      |     |      |    |
| <b>Total Experimental Evidence Points (Maximum 6):</b>                                                                                                                                                                                                                                                                                                                                                                                                                                                                                                                                                                                                                                                                                                                                                                                        |                                                                    |                                                                      |                   |                       |                        |                           | 1.75                                                  | 1.5        | 4           | 6                                                                                                          |   |                               |                                 |  |                        |  |    |    |    |           |                   |                         |                                        |  |  |     |  |   |   |   |    |                            |                                                          |  |  |     |  |   |   |   |                                                    |  |  |  |  |  |  |      |     |      |    |
| <b>Total:</b>                                                                                                                                                                                                                                                                                                                                                                                                                                                                                                                                                                                                                                                                                                                                                                                                                                 |                                                                    |                                                                      |                   |                       |                        |                           | <b>9</b>                                              | <b>8.7</b> | <b>14.5</b> |                                                                                                            |   |                               |                                 |  |                        |  |    |    |    |           |                   |                         |                                        |  |  |     |  |   |   |   |    |                            |                                                          |  |  |     |  |   |   |   |                                                    |  |  |  |  |  |  |      |     |      |    |

| Genetic Evidence Summary                               |                                                                    |                                                                      |                                                          |                                               |                           |                                                       |       |               |           | References                                                                                                                                                                                                                                                       |           |                                                                                                                                                        |     |   |
|--------------------------------------------------------|--------------------------------------------------------------------|----------------------------------------------------------------------|----------------------------------------------------------|-----------------------------------------------|---------------------------|-------------------------------------------------------|-------|---------------|-----------|------------------------------------------------------------------------------------------------------------------------------------------------------------------------------------------------------------------------------------------------------------------|-----------|--------------------------------------------------------------------------------------------------------------------------------------------------------|-----|---|
| Case-Level Data                                        | Evidence Type                                                      |                                                                      | Case Information                                         |                                               |                           | Suggested points/case                                 |       | G1            | G2        | G3                                                                                                                                                                                                                                                               | Max Score | Roux-Buisson et al 2012 (PMID:22422768); Rooryck et al 2015 (PMID:26200674); Walsh et al 2016 (PMID:26768964); O'Callaghan et al 2018 (PMID:30479949); |     |   |
|                                                        | Variant Evidence                                                   | Autosomal dominant disease, OR X-linked disease, affected males      | Variant is <i>de novo</i>                                |                                               |                           | Default                                               | Range |               |           |                                                                                                                                                                                                                                                                  |           |                                                                                                                                                        | 0   | 0 |
|                                                        |                                                                    |                                                                      |                                                          | Proband with predicted or proven null variant |                           |                                                       | 1.5   | 0-2           | 0         | 0                                                                                                                                                                                                                                                                | 0         |                                                                                                                                                        | 10  |   |
|                                                        |                                                                    | Proband with other variant type with some evidence of gene impact    |                                                          |                                               | 0.5                       | 0-1.5                                                 | 0     | 0             | 0         | 7                                                                                                                                                                                                                                                                |           |                                                                                                                                                        |     |   |
|                                                        | Autosomal recessive disease, OR X-linked disease, affected females | Two variants in <i>trans</i> , at least one is LOF or <i>de novo</i> |                                                          |                                               | 2                         | 0-3                                                   | 8     | 10            | 12        | 12                                                                                                                                                                                                                                                               |           |                                                                                                                                                        |     |   |
|                                                        |                                                                    | Two non-LOF variants in <i>trans</i>                                 |                                                          |                                               | 1                         | 0-1.5                                                 | 0     | 0             | 0         | 0                                                                                                                                                                                                                                                                |           |                                                                                                                                                        |     |   |
|                                                        | Segregation Evidence                                               | Evidence of Segregation in one or more families                      | Total LOD Score                                          | Sequencing Method                             | Candidate Gene Sequencing | Exome/Genome or all genes sequenced in linkage region | 0-3   | 0             | 0         | 0                                                                                                                                                                                                                                                                | 3         |                                                                                                                                                        |     |   |
| 2-2.99                                                 |                                                                    |                                                                      |                                                          | 0.5                                           |                           |                                                       |       |               |           |                                                                                                                                                                                                                                                                  |           |                                                                                                                                                        | 1   |   |
| 3-4.99                                                 |                                                                    |                                                                      |                                                          | 1                                             |                           |                                                       |       |               |           |                                                                                                                                                                                                                                                                  |           |                                                                                                                                                        | 2   |   |
| ≥5                                                     |                                                                    |                                                                      |                                                          | 1.5                                           |                           |                                                       |       |               |           |                                                                                                                                                                                                                                                                  |           |                                                                                                                                                        | 3   |   |
|                                                        |                                                                    |                                                                      |                                                          |                                               |                           |                                                       |       |               |           |                                                                                                                                                                                                                                                                  |           |                                                                                                                                                        |     |   |
| Case-Control Data                                      | Case-Control Study Type                                            |                                                                      | Case-Control Quality Criteria                            |                                               |                           | Suggested points/study                                |       | G2            | G3        | G1                                                                                                                                                                                                                                                               | Max Score |                                                                                                                                                        |     |   |
|                                                        | Single Variant Analysis                                            |                                                                      | Variant Detection Methodology<br>Power                   |                                               |                           | 0-6                                                   |       |               |           |                                                                                                                                                                                                                                                                  |           |                                                                                                                                                        | 0   | 0 |
|                                                        | Aggregate Variant Analysis                                         |                                                                      | Bias and Confounding Factors<br>Statistical Significance |                                               |                           | 0-6                                                   |       | 0             | 0         | 0                                                                                                                                                                                                                                                                | 0         |                                                                                                                                                        |     |   |
| <b>Total Genetic Evidence Points (Maximum 12):</b>     |                                                                    |                                                                      |                                                          |                                               |                           |                                                       |       | <b>8</b>      | <b>10</b> | <b>12</b>                                                                                                                                                                                                                                                        | <b>12</b> |                                                                                                                                                        |     |   |
| Experimental Evidence Summary                          |                                                                    |                                                                      |                                                          |                                               |                           |                                                       |       |               |           |                                                                                                                                                                                                                                                                  |           |                                                                                                                                                        |     |   |
| Evidence Category                                      | Evidence Type                                                      |                                                                      |                                                          | Suggested points/item                         |                           | G1                                                    | G2    | G3            | Max Score | Kirchhefer et al 2001 (PMID:11069905)<br>Guo et al 1996 (PMID:8550602)<br>Cacheux et al 2019 (PMID:31607542)<br>Chopra et al 2009 (PMID:19383796)<br>Cacheux et al 2019 (PMID:31607542); Chopra et al 2009 (PMID:19383796)<br>Cacheux et al 2019 (PMID:31607542) |           |                                                                                                                                                        |     |   |
|                                                        | Function                                                           | Biochemical Function                                                 |                                                          |                                               | 0.5                       |                                                       |       |               |           |                                                                                                                                                                                                                                                                  | 0-2       | 0                                                                                                                                                      | 0.5 | 0 |
| Protein Interaction                                    |                                                                    |                                                                      | 0.5                                                      | 0-2                                           | 0                         | 1                                                     | 0.5   |               |           |                                                                                                                                                                                                                                                                  |           |                                                                                                                                                        |     |   |
| Expression                                             |                                                                    |                                                                      | 0.5                                                      | 0-2                                           | 0.5                       | 0.5                                                   | 0.5   |               |           |                                                                                                                                                                                                                                                                  |           |                                                                                                                                                        |     |   |
| Functional Alteration                                  | Patient Cells                                                      |                                                                      |                                                          | 1                                             | 0-2                       | 0                                                     | 0     | 0             | 2         |                                                                                                                                                                                                                                                                  |           |                                                                                                                                                        |     |   |
|                                                        | Non-Patient Cells                                                  |                                                                      |                                                          | 0.5                                           | 0-1                       | 1.5                                                   | 0     | 0             |           |                                                                                                                                                                                                                                                                  |           |                                                                                                                                                        |     |   |
| Models                                                 | Non-human model organism                                           |                                                                      |                                                          | 2                                             | 0-4                       | 2                                                     | 3     | 3             |           |                                                                                                                                                                                                                                                                  |           |                                                                                                                                                        |     |   |
|                                                        | Cell culture model                                                 |                                                                      |                                                          | 1                                             | 0-2                       | 0                                                     | 0     | 1             |           |                                                                                                                                                                                                                                                                  |           |                                                                                                                                                        |     |   |
| Rescue                                                 | Rescue in human                                                    |                                                                      |                                                          | 2                                             | 0-4                       | 0                                                     | 0     | 0             | 4         |                                                                                                                                                                                                                                                                  |           |                                                                                                                                                        |     |   |
|                                                        | Rescue in non-human model organism                                 |                                                                      |                                                          | 2                                             | 0-4                       | 0                                                     | 1.5   | 2             |           |                                                                                                                                                                                                                                                                  |           |                                                                                                                                                        |     |   |
|                                                        | Rescue in cell culture model                                       |                                                                      |                                                          | 1                                             | 0-2                       | 0                                                     | 0     | 0             |           |                                                                                                                                                                                                                                                                  |           |                                                                                                                                                        |     |   |
|                                                        | Rescue in Patient Cells                                            |                                                                      |                                                          | 1                                             | 0-2                       | 0                                                     | 0     | 0             |           |                                                                                                                                                                                                                                                                  |           |                                                                                                                                                        |     |   |
| <b>Total Experimental Evidence Points (Maximum 6):</b> |                                                                    |                                                                      |                                                          |                                               |                           |                                                       |       | <b>4</b>      | <b>6</b>  | <b>5</b>                                                                                                                                                                                                                                                         | <b>6</b>  |                                                                                                                                                        |     |   |
|                                                        |                                                                    |                                                                      |                                                          |                                               |                           |                                                       |       | <b>Total:</b> | <b>12</b> | <b>16</b>                                                                                                                                                                                                                                                        | <b>17</b> |                                                                                                                                                        |     |   |

| Genetic Evidence Summary                               |                                                                    |                                                                      |                                                          |                           |                                                       |                        |             |             |           | References                          |                                                                                                                                                 |  |  |
|--------------------------------------------------------|--------------------------------------------------------------------|----------------------------------------------------------------------|----------------------------------------------------------|---------------------------|-------------------------------------------------------|------------------------|-------------|-------------|-----------|-------------------------------------|-------------------------------------------------------------------------------------------------------------------------------------------------|--|--|
| Case-Level Data                                        | Evidence Type                                                      |                                                                      | Case Information                                         |                           |                                                       | Suggested points/case  |             | G1          | G2        | G3                                  | Max Score                                                                                                                                       |  |  |
|                                                        | Variant Evidence                                                   |                                                                      |                                                          |                           | Default                                               | Range                  |             |             |           |                                     |                                                                                                                                                 |  |  |
|                                                        | Autosomal dominant disease, OR X-linked disease, affected males    | Variant is <i>de novo</i>                                            |                                                          |                           | 2                                                     | 0-3                    | 0           | 0           | 0         | 12                                  | Devalla et al 2016 (PMID:27861123); Webster et al 2020 (PMID:33367594); Mosku-Gregor et al 2020 (PMID:32173957); Xie et al 2019 (PMID:30790670) |  |  |
|                                                        |                                                                    | Proband with predicted or proven null variant                        |                                                          |                           | 1.5                                                   | 0-2                    | 0           | 0           | 0         | 10                                  |                                                                                                                                                 |  |  |
|                                                        |                                                                    | Proband with other variant type with some evidence of gene impact    |                                                          |                           | 0.5                                                   | 0-1.5                  | 1.5         | 0           | 0         | 7                                   |                                                                                                                                                 |  |  |
|                                                        | Autosomal recessive disease, OR X-linked disease, affected females | Two variants in <i>trans</i> , at least one is LOF or <i>de novo</i> |                                                          |                           | 2                                                     | 0-3                    | 11          | 10          | 10        | 12                                  |                                                                                                                                                 |  |  |
|                                                        |                                                                    | Two non-LOF variants in <i>trans</i>                                 |                                                          |                           | 1                                                     | 0-1.5                  | 2.5         | 7           | 2         |                                     |                                                                                                                                                 |  |  |
| Segregation Evidence                                   | Evidence of Segregation in one or more families                    |                                                                      | Sequencing Method                                        |                           |                                                       | 0-3                    | 2.5         | 2           | 3         | 3                                   | Devalla et al 2016 (PMID:27861123); Webster et al 2020 (PMID:33367594);                                                                         |  |  |
|                                                        |                                                                    |                                                                      | Total LOD score                                          | Candidate Gene Sequencing | Exome/Genome or all genes sequenced in linkage region |                        |             |             |           |                                     |                                                                                                                                                 |  |  |
|                                                        |                                                                    |                                                                      | 2-2.99                                                   | 0.5                       | 1                                                     |                        |             |             |           |                                     |                                                                                                                                                 |  |  |
|                                                        |                                                                    |                                                                      | 3-4.99                                                   | 1                         | 2                                                     |                        |             |             |           |                                     |                                                                                                                                                 |  |  |
|                                                        |                                                                    |                                                                      | ≥5                                                       | 1.5                       | 3                                                     |                        |             |             |           |                                     |                                                                                                                                                 |  |  |
| Case-Control Data                                      | Case-Control Study Type                                            |                                                                      | Case-Control Quality Criteria                            |                           |                                                       | Suggested points/study |             | G2          | G3        | G1                                  | Max Score                                                                                                                                       |  |  |
|                                                        | Single Variant Analysis                                            |                                                                      | Variant Detection Methodology<br>Power                   |                           |                                                       | 0-6                    |             | 0           | 0         | 0                                   | 12                                                                                                                                              |  |  |
|                                                        | Aggregate Variant Analysis                                         |                                                                      | Bias and Confounding Factors<br>Statistical Significance |                           |                                                       | 0-6                    |             | 0           | 0         | 0                                   |                                                                                                                                                 |  |  |
| <b>Total Genetic Evidence Points (Maximum 12):</b>     |                                                                    |                                                                      |                                                          |                           |                                                       |                        | 12          | 12          | 12        | 12                                  |                                                                                                                                                 |  |  |
| Experimental Evidence Summary                          |                                                                    |                                                                      |                                                          |                           |                                                       |                        |             |             |           |                                     |                                                                                                                                                 |  |  |
| Evidence Category                                      |                                                                    | Evidence Type                                                        |                                                          |                           | Suggested points/item                                 |                        | G1          | G2          | G3        | Max Score                           |                                                                                                                                                 |  |  |
| Function                                               | Biochemical Function                                               |                                                                      |                                                          | 0.5                       | 0-2                                                   | 0                      | 0           | 0           | 2         | Devalla et al 2016 (PMID:27861123); |                                                                                                                                                 |  |  |
|                                                        | Protein Interaction                                                |                                                                      |                                                          | 0.5                       | 0-2                                                   | 0                      | 0           | 0           |           |                                     |                                                                                                                                                 |  |  |
|                                                        | Expression                                                         |                                                                      |                                                          | 0.5                       | 0-2                                                   | 0.5                    | 0.5         | 1           |           |                                     |                                                                                                                                                 |  |  |
| Functional Alteration                                  | Patient Cells                                                      |                                                                      |                                                          | 1                         | 0-2                                                   | 2                      | 1           | 2           | 2         | Devalla et al 2016 (PMID:27861123); |                                                                                                                                                 |  |  |
|                                                        | Non-Patient Cells                                                  |                                                                      |                                                          | 0.5                       | 0-1                                                   | 0                      | 0           | 0           |           |                                     |                                                                                                                                                 |  |  |
| Models                                                 | Non-human model organism                                           |                                                                      |                                                          | 2                         | 0-4                                                   | 0                      | 0           | 0           | 4         |                                     |                                                                                                                                                 |  |  |
|                                                        | Cell culture model                                                 |                                                                      |                                                          | 1                         | 0-2                                                   | 0                      | 0           | 0           |           |                                     |                                                                                                                                                 |  |  |
| Rescue                                                 | Rescue in human                                                    |                                                                      |                                                          | 2                         | 0-4                                                   | 0                      | 0           | 0           |           |                                     |                                                                                                                                                 |  |  |
|                                                        | Rescue in non-human model organism                                 |                                                                      |                                                          | 2                         | 0-4                                                   | 0                      | 0           | 0           |           |                                     |                                                                                                                                                 |  |  |
|                                                        | Rescue in cell culture model                                       |                                                                      |                                                          | 1                         | 0-2                                                   | 0                      | 0           | 0           |           |                                     |                                                                                                                                                 |  |  |
|                                                        | Rescue in Patient Cells                                            |                                                                      |                                                          | 1                         | 0-2                                                   | 0                      | 0           | 1           |           |                                     |                                                                                                                                                 |  |  |
| <b>Total Experimental Evidence Points (Maximum 6):</b> |                                                                    |                                                                      |                                                          |                           |                                                       |                        | 2.5         | 1.5         | 4         | 6                                   |                                                                                                                                                 |  |  |
| <b>Total:</b>                                          |                                                                    |                                                                      |                                                          |                           |                                                       |                        | <b>14.5</b> | <b>13.5</b> | <b>16</b> |                                     |                                                                                                                                                 |  |  |

CALM1

| Genetic Evidence Summary                               |                                                                    |                                                                      |                  |                   |                           |                                                       |             |          |          | References                                                                                                       |                                     |                                     |   |
|--------------------------------------------------------|--------------------------------------------------------------------|----------------------------------------------------------------------|------------------|-------------------|---------------------------|-------------------------------------------------------|-------------|----------|----------|------------------------------------------------------------------------------------------------------------------|-------------------------------------|-------------------------------------|---|
| Case-Level Data                                        | Evidence Type                                                      |                                                                      | Case Information |                   |                           | Suggested points/case                                 |             | G1       | G2       | G3                                                                                                               | Max Score                           |                                     |   |
|                                                        | Variant Evidence                                                   |                                                                      |                  |                   | Default                   | Range                                                 |             |          |          |                                                                                                                  |                                     |                                     |   |
|                                                        | Autosomal dominant disease, OR X-linked disease, affected males    | Variant is <i>de novo</i>                                            |                  |                   | 2                         | 0-3                                                   | 2           | 3        | 2        | 12                                                                                                               | Nyegaard et al 2012 (PMID:23040497) |                                     |   |
|                                                        |                                                                    | Proband with predicted or proven null variant                        |                  |                   | 1.5                       | 0-2                                                   | 0           | 0        | 0        | 10                                                                                                               |                                     |                                     |   |
|                                                        |                                                                    | Proband with other variant type with some evidence of gene impact    |                  |                   | 0.5                       | 0-1.5                                                 | 0.5         | 2        | 0.5      | 7                                                                                                                |                                     |                                     |   |
|                                                        | Autosomal recessive disease, OR X-linked disease, affected females | Two variants in <i>trans</i> , at least one is LOF or <i>de novo</i> |                  |                   | 2                         | 0-3                                                   | 0           | 0        | 0        | 12                                                                                                               |                                     |                                     |   |
|                                                        |                                                                    | Two non-LOF variants in <i>trans</i>                                 |                  |                   | 1                         | 0-1.5                                                 | 0           | 0        | 0        |                                                                                                                  |                                     |                                     |   |
| Segregation Evidence                                   | Evidence of Segregation in one or more families                    |                                                                      |                  | Sequencing Method |                           |                                                       | 0-3         | 1        | 1.5      | 1                                                                                                                | 3                                   | Nyegaard et al 2012 (PMID:23040497) |   |
|                                                        |                                                                    |                                                                      |                  | Total LOD score   | Candidate Gene Sequencing | Exome/Genome or all genes sequenced in linkage region |             |          |          |                                                                                                                  |                                     |                                     |   |
|                                                        |                                                                    |                                                                      |                  |                   | 2-2.99                    | 0.5                                                   |             |          |          |                                                                                                                  |                                     |                                     | 1 |
|                                                        |                                                                    |                                                                      |                  |                   | 3-4.99                    | 1                                                     |             |          |          |                                                                                                                  |                                     |                                     | 2 |
|                                                        |                                                                    |                                                                      |                  |                   | ≥5                        | 1.5                                                   |             |          |          |                                                                                                                  |                                     |                                     | 3 |
| Case-Control Study Type                                |                                                                    | Case-Control Quality Criteria                                        |                  |                   | Suggested points/study    |                                                       | G2          | G3       | G1       | Max Score                                                                                                        |                                     |                                     |   |
| Single Variant Analysis                                |                                                                    | Variant Detection Methodology<br>Power                               |                  |                   | 0-6                       |                                                       | 0           | 0        | 0        | 12                                                                                                               |                                     |                                     |   |
| Aggregate Variant Analysis                             |                                                                    | Bias and Confounding Factors<br>Statistical Significance             |                  |                   | 0-6                       |                                                       | 0           | 0        | 0        |                                                                                                                  |                                     |                                     |   |
| <b>Total Genetic Evidence Points (Maximum 12):</b>     |                                                                    |                                                                      |                  |                   |                           |                                                       | 3.5         | 6.5      | 3.5      | 12                                                                                                               |                                     |                                     |   |
| Experimental Evidence Summary                          |                                                                    |                                                                      |                  |                   |                           |                                                       |             |          |          |                                                                                                                  |                                     |                                     |   |
| Evidence Category                                      |                                                                    | Evidence Type                                                        |                  |                   | Suggested points/item     |                                                       | G1          | G2       | G3       | Max Score                                                                                                        |                                     |                                     |   |
| Function                                               | Biochemical Function                                               |                                                                      |                  | 0.5               | 0-2                       | 1                                                     | 0.5         | 1        | 2        | Peterson et al 1999 (PMID:10197534)<br>Yamaguchi et al 2003 (PMID:12707260)<br>Crotti et al 2013 (PMID:23388215) |                                     |                                     |   |
|                                                        | Protein Interaction                                                |                                                                      |                  | 0.5               | 0-2                       | 0.5                                                   | 0.5         | 1        |          |                                                                                                                  |                                     |                                     |   |
|                                                        | Expression                                                         |                                                                      |                  | 0.5               | 0-2                       | 0.5                                                   | 0.5         | 0        |          |                                                                                                                  |                                     |                                     |   |
| Functional Alteration                                  | Patient Cells                                                      |                                                                      |                  | 1                 | 0-2                       | 0                                                     | 0           | 0        | 2        | Hwang et al 2014 (PMID:24563457); Søndergaard et al 2015 (PMID:26309258);                                        |                                     |                                     |   |
|                                                        | Non-Patient Cells                                                  |                                                                      |                  | 0.5               | 0-1                       | 1                                                     | 0           | 1.5      |          |                                                                                                                  |                                     |                                     |   |
| Models                                                 | Non-human model organism                                           |                                                                      |                  | 2                 | 0-4                       | 0.25                                                  | 1           | 1        | 4        | Søndergaard et al 2015 (PMID:25557436); Tsai et al 2020 (PMID:32929985)                                          |                                     |                                     |   |
|                                                        | Cell culture model                                                 |                                                                      |                  | 1                 | 0-2                       | 0                                                     | 0           | 0        |          |                                                                                                                  |                                     |                                     |   |
| Rescue                                                 | Rescue in human                                                    |                                                                      |                  | 2                 | 0-4                       | 0                                                     | 0           | 0        | 4        |                                                                                                                  |                                     |                                     |   |
|                                                        | Rescue in non-human model organism                                 |                                                                      |                  | 2                 | 0-4                       | 0                                                     | 0           | 0        |          |                                                                                                                  |                                     |                                     |   |
|                                                        | Rescue in cell culture model                                       |                                                                      |                  | 1                 | 0-2                       | 0                                                     | 0           | 0        |          |                                                                                                                  |                                     |                                     |   |
|                                                        | Rescue in Patient Cells                                            |                                                                      |                  | 1                 | 0-2                       | 0                                                     | 0           | 0        |          |                                                                                                                  |                                     |                                     |   |
| <b>Total Experimental Evidence Points (Maximum 6):</b> |                                                                    |                                                                      |                  |                   |                           |                                                       | 3.25        | 2.5      | 4.5      | 6                                                                                                                |                                     |                                     |   |
| <b>Total:</b>                                          |                                                                    |                                                                      |                  |                   |                           |                                                       | <b>6.75</b> | <b>9</b> | <b>8</b> |                                                                                                                  |                                     |                                     |   |



CALM2

| Genetic Evidence Summary                               |                                                                    |                                                                      |                                                          |                           |                                                       |                        |            |            |          | References                                                                                                       |                                                                                                                 |  |  |
|--------------------------------------------------------|--------------------------------------------------------------------|----------------------------------------------------------------------|----------------------------------------------------------|---------------------------|-------------------------------------------------------|------------------------|------------|------------|----------|------------------------------------------------------------------------------------------------------------------|-----------------------------------------------------------------------------------------------------------------|--|--|
| Case-Level Data                                        | Evidence Type                                                      |                                                                      | Case Information                                         |                           |                                                       | Suggested points/case  |            | G1         | G2       | G3                                                                                                               | Max Score                                                                                                       |  |  |
|                                                        | Variant Evidence                                                   |                                                                      |                                                          |                           | Default                                               | Range                  |            |            |          |                                                                                                                  |                                                                                                                 |  |  |
|                                                        | Autosomal dominant disease, OR X-linked disease, affected males    | Variant is <i>de novo</i>                                            |                                                          |                           | 2                                                     | 0-3                    | 4.5        | 7          | 4.5      | 12                                                                                                               | Crotti et al 2019 (PMID:31170290); Jiménez-Jáimez et al 2016 (PMID:27100291); Makita et al 2014 (PMID:24917665) |  |  |
|                                                        |                                                                    | Proband with predicted or proven null variant                        |                                                          |                           | 1.5                                                   | 0-2                    | 0          | 0          | 0        | 10                                                                                                               |                                                                                                                 |  |  |
|                                                        |                                                                    | Proband with other variant type with some evidence of gene impact    |                                                          |                           | 0.5                                                   | 0-1.5                  | 0          | 0.3        | 0        | 7                                                                                                                |                                                                                                                 |  |  |
|                                                        | Autosomal recessive disease, OR X-linked disease, affected females | Two variants in <i>trans</i> , at least one is LOF or <i>de novo</i> |                                                          |                           | 2                                                     | 0-3                    | 0          | 0          | 0        | 12                                                                                                               |                                                                                                                 |  |  |
|                                                        |                                                                    | Two non-LOF variants in <i>trans</i>                                 |                                                          |                           | 1                                                     | 0-1.5                  | 0          | 0          | 0        |                                                                                                                  |                                                                                                                 |  |  |
| Segregation Evidence                                   | Evidence of Segregation in one or more families                    |                                                                      | Sequencing Method                                        |                           |                                                       | 0-3                    | 0          | 0          | 0        | 3                                                                                                                |                                                                                                                 |  |  |
|                                                        |                                                                    |                                                                      | Total LOD score                                          | Candidate Gene Sequencing | Exome/Genome or all genes sequenced in linkage region |                        |            |            |          |                                                                                                                  |                                                                                                                 |  |  |
|                                                        |                                                                    |                                                                      | 2-2.99                                                   | 0.5                       | 1                                                     |                        |            |            |          |                                                                                                                  |                                                                                                                 |  |  |
|                                                        |                                                                    |                                                                      | 3-4.99                                                   | 1                         | 2                                                     |                        |            |            |          |                                                                                                                  |                                                                                                                 |  |  |
|                                                        |                                                                    |                                                                      | ≥5                                                       | 1.5                       | 3                                                     |                        |            |            |          |                                                                                                                  |                                                                                                                 |  |  |
| Case-Control Data                                      | Case-Control Study Type                                            |                                                                      | Case-Control Quality Criteria                            |                           |                                                       | Suggested points/study |            | G2         | G3       | G1                                                                                                               | Max Score                                                                                                       |  |  |
|                                                        | Single Variant Analysis                                            |                                                                      | Variant Detection Methodology<br>Power                   |                           |                                                       | 0-6                    |            | 0          | 0        | 0                                                                                                                | 12                                                                                                              |  |  |
|                                                        | Aggregate Variant Analysis                                         |                                                                      | Bias and Confounding Factors<br>Statistical Significance |                           |                                                       | 0-6                    |            | 0          | 0        | 0                                                                                                                |                                                                                                                 |  |  |
| <b>Total Genetic Evidence Points (Maximum 12):</b>     |                                                                    |                                                                      |                                                          |                           |                                                       |                        | 4.5        | 7.3        | 4.5      | 12                                                                                                               |                                                                                                                 |  |  |
| Experimental Evidence Summary                          |                                                                    |                                                                      |                                                          |                           |                                                       |                        |            |            |          |                                                                                                                  |                                                                                                                 |  |  |
| Evidence Category                                      |                                                                    | Evidence Type                                                        |                                                          |                           | Suggested points/item                                 |                        | G1         | G2         | G3       | Max Score                                                                                                        |                                                                                                                 |  |  |
| Function                                               | Biochemical Function                                               |                                                                      |                                                          | 0.5                       | 0-2                                                   | 1                      | 0.5        | 2          | 2        | Peterson et al 1999 (PMID:10197534)<br>Yamaguchi et al 2003 (PMID:12707260)<br>Crotti et al 2013 (PMID:23388215) |                                                                                                                 |  |  |
|                                                        | Protein Interaction                                                |                                                                      |                                                          | 0.5                       | 0-2                                                   | 0.5                    | 0.5        | 0          |          |                                                                                                                  |                                                                                                                 |  |  |
|                                                        | Expression                                                         |                                                                      |                                                          | 0.5                       | 0-2                                                   | 0.5                    | 0.5        | 0          |          |                                                                                                                  |                                                                                                                 |  |  |
| Functional Alteration                                  | Patient Cells                                                      |                                                                      |                                                          | 1                         | 0-2                                                   | 0                      | 0          | 0          | 2        | Søndergaard et al 2015 (PMID:26309258);                                                                          |                                                                                                                 |  |  |
|                                                        | Non-Patient Cells                                                  |                                                                      |                                                          | 0.5                       | 0-1                                                   | 0                      | 0.5        | 0.5        |          |                                                                                                                  |                                                                                                                 |  |  |
| Models                                                 | Non-human model organism                                           |                                                                      |                                                          | 2                         | 0-4                                                   | 0                      | 0.5        | 1          | 4        | Søndergaard et al 2015 (PMID:25557436);                                                                          |                                                                                                                 |  |  |
|                                                        | Cell culture model                                                 |                                                                      |                                                          | 1                         | 0-2                                                   | 0                      | 0          | 0          |          |                                                                                                                  |                                                                                                                 |  |  |
| Rescue                                                 | Rescue in human                                                    |                                                                      |                                                          | 2                         | 0-4                                                   | 0                      | 0          | 0          | 4        |                                                                                                                  |                                                                                                                 |  |  |
|                                                        | Rescue in non-human model organism                                 |                                                                      |                                                          | 2                         | 0-4                                                   | 0                      | 0          | 0          |          |                                                                                                                  |                                                                                                                 |  |  |
|                                                        | Rescue in cell culture model                                       |                                                                      |                                                          | 1                         | 0-2                                                   | 0                      | 0          | 0          |          |                                                                                                                  |                                                                                                                 |  |  |
|                                                        | Rescue in Patient Cells                                            |                                                                      |                                                          | 1                         | 0-2                                                   | 0                      | 0          | 0          |          |                                                                                                                  |                                                                                                                 |  |  |
| <b>Total Experimental Evidence Points (Maximum 6):</b> |                                                                    |                                                                      |                                                          |                           |                                                       |                        | 2          | 2.5        | 3.5      | 6                                                                                                                |                                                                                                                 |  |  |
| <b>Total:</b>                                          |                                                                    |                                                                      |                                                          |                           |                                                       |                        | <b>6.5</b> | <b>9.8</b> | <b>8</b> |                                                                                                                  |                                                                                                                 |  |  |

CALM3

| Genetic Evidence Summary                               |                                    |                                                                    |                                                                      |       |                       |                        |          |          |          | References |                                                                                                                                                                                                  |                                                                             |  |
|--------------------------------------------------------|------------------------------------|--------------------------------------------------------------------|----------------------------------------------------------------------|-------|-----------------------|------------------------|----------|----------|----------|------------|--------------------------------------------------------------------------------------------------------------------------------------------------------------------------------------------------|-----------------------------------------------------------------------------|--|
| Case-Level Data                                        | Evidence Type                      |                                                                    | Case Information                                                     |       |                       | Suggested points/case  |          | G1       | G2       | G3         | Max Score                                                                                                                                                                                        | Crotti et al 2019 (PMID:31170290); Gomez-Hurtado et al 2016 (PMID:27516456) |  |
|                                                        | Variant Evidence                   | Autosomal dominant disease, OR X-linked disease, affected males    | Variant is <i>de novo</i>                                            |       |                       | 2                      | 0-3      | 0        | 0        | 3          | 12                                                                                                                                                                                               |                                                                             |  |
|                                                        |                                    |                                                                    | Proband with predicted or proven null variant                        |       |                       | 1.5                    | 0-2      | 0        | 0        | 0          | 10                                                                                                                                                                                               |                                                                             |  |
|                                                        |                                    |                                                                    | Proband with other variant type with some evidence of gene impact    |       |                       | 0.5                    | 0-1.5    | 1.5      | 1        | 0          | 7                                                                                                                                                                                                |                                                                             |  |
|                                                        |                                    | Autosomal recessive disease, OR X-linked disease, affected females | Two variants in <i>trans</i> , at least one is LOF or <i>de novo</i> |       |                       | 2                      | 0-3      | 0        | 0        | 0          | 12                                                                                                                                                                                               |                                                                             |  |
| Two non-LOF variants in <i>trans</i>                   |                                    |                                                                    | 1                                                                    | 0-1.5 | 0                     | 0                      | 0        |          |          |            |                                                                                                                                                                                                  |                                                                             |  |
| Case-Control Data                                      | Case-Control Study Type            |                                                                    | Case-Control Quality Criteria                                        |       |                       | Suggested points/study |          | G2       | G3       | G1         | Max Score                                                                                                                                                                                        |                                                                             |  |
|                                                        | Single Variant Analysis            | Variant Detection Methodology                                      |                                                                      |       | 0-6                   |                        | 0        | 0        | 0        | 12         |                                                                                                                                                                                                  |                                                                             |  |
|                                                        |                                    | Power                                                              |                                                                      |       |                       |                        |          |          |          |            |                                                                                                                                                                                                  |                                                                             |  |
|                                                        | Aggregate Variant Analysis         | Bias and Confounding Factors                                       |                                                                      |       | 0-6                   |                        | 0        | 0        | 0        | 12         |                                                                                                                                                                                                  |                                                                             |  |
|                                                        |                                    | Statistical Significance                                           |                                                                      |       |                       |                        |          |          |          |            |                                                                                                                                                                                                  |                                                                             |  |
|                                                        |                                    |                                                                    |                                                                      |       |                       |                        |          |          |          |            |                                                                                                                                                                                                  |                                                                             |  |
| <b>Total Genetic Evidence Points (Maximum 12):</b>     |                                    |                                                                    |                                                                      |       |                       |                        | 1.5      | 1        | 3        | 12         |                                                                                                                                                                                                  |                                                                             |  |
| Experimental Evidence Summary                          |                                    |                                                                    |                                                                      |       |                       |                        |          |          |          |            |                                                                                                                                                                                                  |                                                                             |  |
| Evidence Category                                      |                                    | Evidence Type                                                      |                                                                      |       | Suggested points/item |                        | G1       | G2       | G3       | Max Score  | Peterson et al 1999 (PMID:10197534)<br>Yamaguchi et al 2003 (PMID:12707260)<br>Crotti et al 2013 (PMID:23388215)<br>Gomez-Hurtado et al 2016 (PMID:27516456); Makita et al 2016 (PMID:24917665); |                                                                             |  |
| Function                                               | Biochemical Function               |                                                                    |                                                                      | 0.5   | 0-2                   | 1                      | 0.5      | 0.5      | 0        | 2          |                                                                                                                                                                                                  |                                                                             |  |
|                                                        | Protein Interaction                |                                                                    |                                                                      | 0.5   | 0-2                   | 0.5                    | 0.5      | 0        |          |            |                                                                                                                                                                                                  |                                                                             |  |
|                                                        | Expression                         |                                                                    |                                                                      | 0.5   | 0-2                   | 0.5                    | 0.5      | 0        |          |            |                                                                                                                                                                                                  |                                                                             |  |
| Functional Alteration                                  | Patient Cells                      |                                                                    |                                                                      | 1     | 0-2                   | 0                      | 0        | 0        | 2        |            |                                                                                                                                                                                                  |                                                                             |  |
|                                                        | Non-Patient Cells                  |                                                                    |                                                                      | 0.5   | 0-1                   | 0.5                    | 0.5      | 0.5      |          |            |                                                                                                                                                                                                  |                                                                             |  |
| Models                                                 | Non-human model organism           |                                                                    |                                                                      | 2     | 0-4                   | 0                      | 0        | 0        | 4        |            |                                                                                                                                                                                                  |                                                                             |  |
|                                                        | Cell culture model                 |                                                                    |                                                                      | 1     | 0-2                   | 0                      | 0        | 0        |          |            |                                                                                                                                                                                                  |                                                                             |  |
| Rescue                                                 | Rescue in human                    |                                                                    |                                                                      | 2     | 0-4                   | 0                      | 0        | 0        |          |            |                                                                                                                                                                                                  |                                                                             |  |
|                                                        | Rescue in non-human model organism |                                                                    |                                                                      | 2     | 0-4                   | 0                      | 0        | 0        |          |            |                                                                                                                                                                                                  |                                                                             |  |
|                                                        | Rescue in cell culture model       |                                                                    |                                                                      | 1     | 0-2                   | 0                      | 0        | 0        |          |            |                                                                                                                                                                                                  |                                                                             |  |
|                                                        | Rescue in Patient Cells            |                                                                    |                                                                      | 1     | 0-2                   | 0                      | 0        | 0        |          |            |                                                                                                                                                                                                  |                                                                             |  |
| <b>Total Experimental Evidence Points (Maximum 6):</b> |                                    |                                                                    |                                                                      |       |                       |                        | 2.5      | 2        | 1        | 6          |                                                                                                                                                                                                  |                                                                             |  |
| <b>Total:</b>                                          |                                    |                                                                    |                                                                      |       |                       |                        | <b>4</b> | <b>3</b> | <b>4</b> |            |                                                                                                                                                                                                  |                                                                             |  |

ANK2

| Genetic Evidence Summary                               |                                                                    |                                                                      |                                                                   |     |                        |                           |               |             |            | References                                                           |           |   |                                                       |   |
|--------------------------------------------------------|--------------------------------------------------------------------|----------------------------------------------------------------------|-------------------------------------------------------------------|-----|------------------------|---------------------------|---------------|-------------|------------|----------------------------------------------------------------------|-----------|---|-------------------------------------------------------|---|
| Case-Level Data                                        | Evidence Type                                                      |                                                                      | Case Information                                                  |     |                        | Suggested points/case     |               | G1          | G2         | G3                                                                   | Max Score |   |                                                       |   |
|                                                        | Variant Evidence                                                   | Autosomal dominant disease, OR X-linked disease, affected males      | Variant is <i>de novo</i>                                         |     |                        | 2                         | 0-3           | 0           | 0          | 0                                                                    | 12        |   |                                                       |   |
|                                                        |                                                                    |                                                                      | Proband with predicted or proven null variant                     |     |                        | 1.5                       | 0-2           | 0           | 0          | 0                                                                    | 10        |   |                                                       |   |
|                                                        |                                                                    |                                                                      | Proband with other variant type with some evidence of gene impact |     |                        | 0.5                       | 0-1.5         | 0.25        | 0          | 0                                                                    | 7         |   |                                                       |   |
|                                                        | Autosomal recessive disease, OR X-linked disease, affected females | Two variants in <i>trans</i> , at least one is LOF or <i>de novo</i> |                                                                   |     | 2                      | 0-3                       | 0             | 0           | 0          | 12                                                                   |           |   |                                                       |   |
|                                                        |                                                                    | Two non-LOF variants in <i>trans</i>                                 |                                                                   |     | 1                      | 0-1.5                     | 0             | 0           | 0          |                                                                      |           |   |                                                       |   |
|                                                        | Segregation Evidence                                               | Evidence of Segregation in one or more families                      |                                                                   |     | Sequencing Method      |                           | 0-3           | 0           | 0          | 0                                                                    | 3         |   |                                                       |   |
|                                                        |                                                                    |                                                                      |                                                                   |     | Total LOD Score        | Candidate Gene Sequencing |               |             |            |                                                                      |           |   | Exome/Genome or all genes sequenced in linkage region |   |
|                                                        |                                                                    |                                                                      |                                                                   |     |                        | 2-2.99                    |               |             |            |                                                                      |           |   | 0.5                                                   | 1 |
|                                                        |                                                                    |                                                                      |                                                                   |     |                        | 3-4.99                    |               |             |            |                                                                      |           |   | 1                                                     | 2 |
| ≥5                                                     |                                                                    |                                                                      |                                                                   |     |                        | 1.5                       |               |             |            |                                                                      |           | 3 |                                                       |   |
| Case-Control Study Type                                |                                                                    | Case-Control Quality Criteria                                        |                                                                   |     | Suggested points/study |                           | G2            | G3          | G1         | Max Score                                                            |           |   |                                                       |   |
| Single Variant Analysis                                |                                                                    | Variant Detection Methodology<br>Power                               |                                                                   |     | 0-6                    |                           | 0             | 0           | 0          | 12                                                                   |           |   |                                                       |   |
| Aggregate Variant Analysis                             |                                                                    | Bias and Confounding Factors<br>Statistical Significance             |                                                                   |     | 0-6                    |                           | 0             | 0           | 0          |                                                                      |           |   |                                                       |   |
| <b>Total Genetic Evidence Points (Maximum 12):</b>     |                                                                    |                                                                      |                                                                   |     |                        |                           | 0.25          | 0           | 0          | 12                                                                   |           |   |                                                       |   |
| Experimental Evidence Summary                          |                                                                    |                                                                      |                                                                   |     |                        |                           |               |             |            |                                                                      |           |   |                                                       |   |
| Evidence Category                                      |                                                                    | Evidence Type                                                        |                                                                   |     | Suggested points/item  |                           | G1            | G2          | G3         | Max Score                                                            |           |   |                                                       |   |
| Function                                               | Biochemical Function                                               |                                                                      |                                                                   | 0.5 | 0-2                    | 0                         | 0             | 0           | 2          |                                                                      |           |   |                                                       |   |
|                                                        | Protein Interaction                                                |                                                                      |                                                                   | 0.5 | 0-2                    | 0                         | 0             | 0           |            |                                                                      |           |   |                                                       |   |
|                                                        | Expression                                                         |                                                                      |                                                                   | 0.5 | 0-2                    | 0                         | 0             | 0           |            |                                                                      |           |   |                                                       |   |
| Functional Alteration                                  | Patient Cells                                                      |                                                                      |                                                                   | 1   | 0-2                    | 0                         | 0             | 0           | 2          | Mohler et al 2004 (PMID:15178757); Mohler et al 2007 (PMID:17242276) |           |   |                                                       |   |
|                                                        | Non-Patient Cells                                                  |                                                                      |                                                                   | 0.5 | 0-1                    | 0                         | 0.5           | 0.5         |            |                                                                      |           |   |                                                       |   |
| Models                                                 | Non-human model organism                                           |                                                                      |                                                                   | 2   | 0-4                    | 0                         | 0             | 1           | 4          | Mohler et al 2003 (PMID:12571597)                                    |           |   |                                                       |   |
|                                                        | Cell culture model                                                 |                                                                      |                                                                   | 1   | 0-2                    | 0                         | 0             | 0           |            |                                                                      |           |   |                                                       |   |
| Rescue                                                 | Rescue in human                                                    |                                                                      |                                                                   | 2   | 0-4                    | 0                         | 0             | 0           | 4          |                                                                      |           |   |                                                       |   |
|                                                        | Rescue in non-human model organism                                 |                                                                      |                                                                   | 2   | 0-4                    | 0                         | 0             | 0           |            |                                                                      |           |   |                                                       |   |
|                                                        | Rescue in cell culture model                                       |                                                                      |                                                                   | 1   | 0-2                    | 0                         | 0             | 0           |            |                                                                      |           |   |                                                       |   |
|                                                        | Rescue in Patient Cells                                            |                                                                      |                                                                   | 1   | 0-2                    | 0                         | 0             | 0           |            |                                                                      |           |   |                                                       |   |
| <b>Total Experimental Evidence Points (Maximum 6):</b> |                                                                    |                                                                      |                                                                   |     |                        |                           | 0             | 0.5         | 1.5        | 6                                                                    |           |   |                                                       |   |
|                                                        |                                                                    |                                                                      |                                                                   |     |                        |                           | <b>Total:</b> | <b>0.25</b> | <b>0.5</b> | <b>1.5</b>                                                           |           |   |                                                       |   |

| Genetic Evidence Summary                               |                                                                    |                                                                      |                                                          |     |                           |                                                       |            |          |            | References |                                                                                                            |   |
|--------------------------------------------------------|--------------------------------------------------------------------|----------------------------------------------------------------------|----------------------------------------------------------|-----|---------------------------|-------------------------------------------------------|------------|----------|------------|------------|------------------------------------------------------------------------------------------------------------|---|
| Case-Level Data                                        | Evidence Type                                                      |                                                                      | Case Information                                         |     |                           | Suggested points/case                                 |            | G1       | G2         | G3         | Max Score                                                                                                  |   |
|                                                        | Variant Evidence                                                   |                                                                      |                                                          |     | Default                   | Range                                                 |            |          |            |            |                                                                                                            |   |
|                                                        | Autosomal dominant disease, OR X-linked disease, affected males    | Variant is <i>de novo</i>                                            |                                                          |     | 2                         | 0-3                                                   | 0          | 0        | 0          | 12         | Tester et al 2006 (PMID:16818210); Kimura et al 2012 (PMID:22589293); Kalscheur et al 2014 (PMID:24561538) |   |
|                                                        |                                                                    | Proband with predicted or proven null variant                        |                                                          |     | 1.5                       | 0-2                                                   | 0          | 0        | 0          | 10         |                                                                                                            |   |
|                                                        |                                                                    | Proband with other variant type with some evidence of gene impact    |                                                          |     | 0.5                       | 0-1.5                                                 | 2          | 0        | 1          | 7          |                                                                                                            |   |
|                                                        | Autosomal recessive disease, OR X-linked disease, affected females | Two variants in <i>trans</i> , at least one is LOF or <i>de novo</i> |                                                          |     |                           | 2                                                     | 0-3        | 0        | 0          | 0          | 12                                                                                                         |   |
|                                                        |                                                                    | Two non-LOF variants in <i>trans</i>                                 |                                                          |     |                           | 1                                                     | 0-1.5      | 0        | 0          | 0          |                                                                                                            |   |
| Segregation Evidence                                   | Evidence of Segregation in one or more families                    | Total LOD score                                                      | Sequencing Method                                        |     | Candidate Gene Sequencing | Exome/Genome or all genes sequenced in linkage region | 0-3        | 0        | 0          | 0          | 3                                                                                                          |   |
|                                                        |                                                                    |                                                                      | 2-2.99                                                   | 0.5 |                           |                                                       |            |          |            |            |                                                                                                            | 1 |
|                                                        |                                                                    |                                                                      | 3-4.99                                                   | 1   |                           |                                                       |            |          |            |            |                                                                                                            | 2 |
|                                                        |                                                                    |                                                                      | ≥5                                                       | 1.5 |                           |                                                       |            |          |            |            |                                                                                                            | 3 |
|                                                        |                                                                    |                                                                      |                                                          |     |                           |                                                       |            |          |            |            |                                                                                                            |   |
| Case-Control Data                                      | Case-Control Study Type                                            |                                                                      | Case-Control Quality Criteria                            |     |                           | Suggested points/study                                |            | G2       | G3         | G1         | Max Score                                                                                                  |   |
|                                                        | Single Variant Analysis                                            |                                                                      | Variant Detection Methodology<br>Power                   |     |                           | 0-6                                                   |            | 0        | 0          | 0          | 12                                                                                                         |   |
|                                                        | Aggregate Variant Analysis                                         |                                                                      | Bias and Confounding Factors<br>Statistical Significance |     |                           | 0-6                                                   |            | 0        | 0          | 0          |                                                                                                            |   |
| <b>Total Genetic Evidence Points (Maximum 12):</b>     |                                                                    |                                                                      |                                                          |     |                           |                                                       | 2          | 0        | 1          | 12         |                                                                                                            |   |
| Experimental Evidence Summary                          |                                                                    |                                                                      |                                                          |     |                           |                                                       |            |          |            |            |                                                                                                            |   |
| Evidence Category                                      |                                                                    | Evidence Type                                                        |                                                          |     | Suggested points/item     |                                                       | G1         | G2       | G3         | Max Score  |                                                                                                            |   |
| Function                                               | Biochemical Function                                               |                                                                      |                                                          |     | 0.5                       | 0-2                                                   | 0          | 0        | 0          | 2          | Barajas-Martinez et al 2011 (PMID:21148745)                                                                |   |
|                                                        | Protein Interaction                                                |                                                                      |                                                          |     | 0.5                       | 0-2                                                   | 0          | 0        | 0.5        |            |                                                                                                            |   |
|                                                        | Expression                                                         |                                                                      |                                                          |     | 0.5                       | 0-2                                                   | 0          | 0.5      | 0          |            |                                                                                                            |   |
| Functional Alteration                                  | Patient Cells                                                      |                                                                      |                                                          |     | 1                         | 0-2                                                   | 0          | 0        | 0          | 2          | Vega et al 2009 (PMID:19843922); Kimura et al 2012 (PMID:22589293); Kalscheur et al 2014 (PMID:24561538)   |   |
|                                                        | Non-Patient Cells                                                  |                                                                      |                                                          |     | 0.5                       | 0-1                                                   | 0.5        | 1.5      | 2          |            |                                                                                                            |   |
| Models                                                 | Non-human model organism                                           |                                                                      |                                                          |     | 2                         | 0-4                                                   | 0          | 0        | 0          | 4          |                                                                                                            |   |
|                                                        | Cell culture model                                                 |                                                                      |                                                          |     | 1                         | 0-2                                                   | 0          | 0        | 0          |            |                                                                                                            |   |
| Rescue                                                 | Rescue in human                                                    |                                                                      |                                                          |     | 2                         | 0-4                                                   | 0          | 0        | 0          | 4          |                                                                                                            |   |
|                                                        | Rescue in non-human model organism                                 |                                                                      |                                                          |     | 2                         | 0-4                                                   | 0          | 0        | 0          |            |                                                                                                            |   |
|                                                        | Rescue in cell culture model                                       |                                                                      |                                                          |     | 1                         | 0-2                                                   | 0          | 0        | 1          |            |                                                                                                            |   |
|                                                        | Rescue in Patient Cells                                            |                                                                      |                                                          |     | 1                         | 0-2                                                   | 0          | 0        | 0          |            |                                                                                                            |   |
| <b>Total Experimental Evidence Points (Maximum 6):</b> |                                                                    |                                                                      |                                                          |     |                           |                                                       | 0.5        | 2        | 3.5        | 6          |                                                                                                            |   |
| <b>Total:</b>                                          |                                                                    |                                                                      |                                                          |     |                           |                                                       | <b>2.5</b> | <b>2</b> | <b>4.5</b> |            |                                                                                                            |   |

| Genetic Evidence Summary                               |                                    |                                                                    |                                                                      |                           |                                                       |                        |            |            |          | References                         |           |                                   |  |
|--------------------------------------------------------|------------------------------------|--------------------------------------------------------------------|----------------------------------------------------------------------|---------------------------|-------------------------------------------------------|------------------------|------------|------------|----------|------------------------------------|-----------|-----------------------------------|--|
| Case-Level Data                                        | Evidence Type                      |                                                                    | Case Information                                                     |                           |                                                       | Suggested points/case  |            | G1         | G2       | G3                                 | Max Score |                                   |  |
|                                                        | Variant Evidence                   |                                                                    |                                                                      |                           | Default                                               | Range                  |            |            |          |                                    |           |                                   |  |
|                                                        | Variant Evidence                   | Autosomal dominant disease, OR X-linked disease, affected males    | Variant is <i>de novo</i>                                            |                           |                                                       | 2                      | 0-3        | 0          | 0        | 0                                  | 12        | Tester et al 2019 (PMID:30678776) |  |
|                                                        |                                    |                                                                    | Proband with predicted or proven null variant                        |                           |                                                       | 1.5                    | 0-2        | 2.5        | 4.6      | 0                                  | 10        |                                   |  |
|                                                        |                                    |                                                                    | Proband with other variant type with some evidence of gene impact    |                           |                                                       | 0.5                    | 0-1.5      | 0          | 0        | 0                                  | 7         |                                   |  |
|                                                        | Segregation Evidence               | Autosomal recessive disease, OR X-linked disease, affected females | Two variants in <i>trans</i> , at least one is LOF or <i>de novo</i> |                           |                                                       | 2                      | 0-3        | 0          | 0        | 0                                  | 12        |                                   |  |
|                                                        |                                    |                                                                    | Two non-LOF variants in <i>trans</i>                                 |                           |                                                       | 1                      | 0-1.5      | 0          | 0        | 0                                  | 0         |                                   |  |
|                                                        |                                    |                                                                    |                                                                      |                           |                                                       |                        |            |            |          |                                    |           |                                   |  |
|                                                        |                                    | Evidence of Segregation in one or more families                    | Total LOD Score                                                      | Sequencing Method         |                                                       | 0-3                    | 0          | 0          | 0        | 3                                  |           |                                   |  |
|                                                        |                                    |                                                                    |                                                                      | Candidate Gene Sequencing | Exome/Genome or all genes sequenced in linkage region |                        |            |            |          |                                    |           |                                   |  |
|                                                        |                                    |                                                                    |                                                                      | 2-2.99                    | 0.5                                                   |                        |            |            |          |                                    |           | 1                                 |  |
|                                                        |                                    |                                                                    |                                                                      | 3-4.99                    | 1                                                     |                        |            |            |          |                                    |           | 2                                 |  |
|                                                        |                                    |                                                                    | ≥5                                                                   | 1.5                       | 3                                                     |                        |            |            |          |                                    |           |                                   |  |
| Case-Control Data                                      | Case-Control Study Type            |                                                                    | Case-Control Quality Criteria                                        |                           |                                                       | Suggested points/study |            | G2         | G3       | G1                                 | Max Score |                                   |  |
|                                                        | Single Variant Analysis            |                                                                    | Variant Detection Methodology<br>Power                               |                           |                                                       | 0-6                    |            | 0          | 0        | 0                                  | 12        |                                   |  |
|                                                        | Aggregate Variant Analysis         |                                                                    | Bias and Confounding Factors<br>Statistical Significance             |                           |                                                       | 0-6                    |            | 0          | 0        | 0                                  |           |                                   |  |
| <b>Total Genetic Evidence Points (Maximum 12):</b>     |                                    |                                                                    |                                                                      |                           |                                                       |                        | 2.5        | 4.6        | 0        | 12                                 |           |                                   |  |
| Experimental Evidence Summary                          |                                    |                                                                    |                                                                      |                           |                                                       |                        |            |            |          |                                    |           |                                   |  |
| Evidence Category                                      |                                    | Evidence Type                                                      |                                                                      |                           | Suggested points/item                                 |                        | G1         | G2         | G3       | Max Score                          |           |                                   |  |
|                                                        |                                    |                                                                    |                                                                      |                           | Default                                               | Range                  |            |            |          |                                    |           |                                   |  |
| Function                                               | Biochemical Function               |                                                                    |                                                                      | 0.5                       | 0-2                                                   | 0                      | 0          | 0          | 2        | Mertens et al 1996 (PMID:8922383)  |           |                                   |  |
|                                                        | Protein Interaction                |                                                                    |                                                                      | 0.5                       | 0-2                                                   | 0                      | 0          | 0          |          |                                    |           |                                   |  |
|                                                        | Expression                         |                                                                    |                                                                      | 0.5                       | 0-2                                                   | 0                      | 0          | 0          |          |                                    |           |                                   |  |
| Functional Alteration                                  | Patient Cells                      |                                                                    |                                                                      | 1                         | 0-2                                                   | 0                      | 0          | 0          | 2        |                                    |           |                                   |  |
|                                                        | Non-Patient Cells                  |                                                                    |                                                                      | 0.5                       | 0-1                                                   | 0                      | 0.5        | 0          |          |                                    |           |                                   |  |
| Models                                                 | Non-human model organism           |                                                                    |                                                                      | 2                         | 0-4                                                   | 1                      | 0          | 0          | 4        | Cerrone et al 2017 (PMID:28740174) |           |                                   |  |
|                                                        | Cell culture model                 |                                                                    |                                                                      | 1                         | 0-2                                                   | 0                      | 0          | 0          |          |                                    |           |                                   |  |
| Rescue                                                 | Rescue in human                    |                                                                    |                                                                      | 2                         | 0-4                                                   | 0                      | 0          | 0          | 4        |                                    |           |                                   |  |
|                                                        | Rescue in non-human model organism |                                                                    |                                                                      | 2                         | 0-4                                                   | 0                      | 0          | 0          |          |                                    |           |                                   |  |
|                                                        | Rescue in cell culture model       |                                                                    |                                                                      | 1                         | 0-2                                                   | 0                      | 0          | 0          |          |                                    |           |                                   |  |
|                                                        | Rescue in Patient Cells            |                                                                    |                                                                      | 1                         | 0-2                                                   | 0                      | 0          | 0          |          |                                    |           |                                   |  |
| <b>Total Experimental Evidence Points (Maximum 6):</b> |                                    |                                                                    |                                                                      |                           |                                                       |                        | 1          | 0.5        | 0        | 6                                  |           |                                   |  |
| <b>Total:</b>                                          |                                    |                                                                    |                                                                      |                           |                                                       |                        | <b>3.5</b> | <b>5.1</b> | <b>0</b> |                                    |           |                                   |  |

| Genetic Evidence Summary                               |                                                                    |                                                                      |                               |                                                       |         |                        |          |            |           | References                        |                                 |  |  |
|--------------------------------------------------------|--------------------------------------------------------------------|----------------------------------------------------------------------|-------------------------------|-------------------------------------------------------|---------|------------------------|----------|------------|-----------|-----------------------------------|---------------------------------|--|--|
| Case-Level Data                                        | Evidence Type                                                      |                                                                      | Case Information              |                                                       |         | Suggested points/case  |          | G1         | G2        | G3                                | Max Score                       |  |  |
|                                                        | Variant Evidence                                                   |                                                                      |                               |                                                       | Default | Range                  |          |            |           |                                   |                                 |  |  |
|                                                        | Autosomal dominant disease, OR X-linked disease, affected males    | Variant is <i>de novo</i>                                            |                               |                                                       | 2       | 0-3                    | 0        | 0          | 0         | 12                                | Swan et al 2014 (PMID:25210054) |  |  |
|                                                        |                                                                    | Proband with predicted or proven null variant                        |                               |                                                       | 1.5     | 0-2                    | 0        | 0          | 0         | 10                                |                                 |  |  |
|                                                        |                                                                    | Proband with other variant type with some evidence of gene impact    |                               |                                                       | 0.5     | 0-1.5                  | 0.25     | 0          | 0         | 7                                 |                                 |  |  |
|                                                        | Autosomal recessive disease, OR X-linked disease, affected females | Two variants in <i>trans</i> , at least one is LOF or <i>de novo</i> |                               |                                                       | 2       | 0-3                    | 0        | 0          | 0         | 12                                |                                 |  |  |
|                                                        |                                                                    | Two non-LOF variants in <i>trans</i>                                 |                               |                                                       | 1       | 0-1.5                  | 0        | 0          | 0         |                                   |                                 |  |  |
| Segregation Evidence                                   | Evidence of Segregation in one or more families                    | Total LOD Score                                                      | Sequencing Method             |                                                       | 0-3     | 2                      | 2        | 0          | 3         |                                   |                                 |  |  |
|                                                        |                                                                    |                                                                      | Candidate Gene Sequencing     | Exome/Genome or all genes sequenced in linkage region |         |                        |          |            |           |                                   |                                 |  |  |
|                                                        |                                                                    |                                                                      | 2-2.99                        | 0.5                                                   |         |                        |          |            |           |                                   | 1                               |  |  |
|                                                        |                                                                    |                                                                      | 3-4.99                        | 1                                                     |         |                        |          |            |           |                                   | 2                               |  |  |
|                                                        |                                                                    |                                                                      | ≥5                            | 1.5                                                   |         |                        |          |            |           |                                   | 3                               |  |  |
| Case-Control Data                                      | Case-Control Study Type                                            |                                                                      | Case-Control Quality Criteria |                                                       |         | Suggested points/study |          | G2         | G3        | G1                                | Max Score                       |  |  |
|                                                        | Single Variant Analysis                                            | Variant Detection Methodology                                        |                               |                                                       | 0-6     |                        | 0        | 0          | 0         | 12                                |                                 |  |  |
|                                                        |                                                                    | Power                                                                |                               |                                                       |         |                        |          |            |           |                                   |                                 |  |  |
| Aggregate Variant Analysis                             | Bias and Confounding Factors                                       |                                                                      |                               | 0-6                                                   |         | 0                      | 0        | 0          |           |                                   |                                 |  |  |
|                                                        | Statistical Significance                                           |                                                                      |                               |                                                       |         |                        |          |            |           |                                   |                                 |  |  |
| <b>Total Genetic Evidence Points (Maximum 12):</b>     |                                                                    |                                                                      |                               |                                                       |         |                        | 2.25     | 2          | 0         | 12                                |                                 |  |  |
| Experimental Evidence Summary                          |                                                                    |                                                                      |                               |                                                       |         |                        |          |            |           |                                   |                                 |  |  |
| Evidence Category                                      | Evidence Type                                                      |                                                                      |                               | Suggested points/item                                 |         | G1                     | G2       | G3         | Max Score |                                   |                                 |  |  |
| Function                                               | Biochemical Function                                               |                                                                      |                               | 0.5                                                   | 0-2     | 0                      | 0        | 0          | 2         | Gellens et al 1992 (PMID:1309946) |                                 |  |  |
|                                                        | Protein Interaction                                                |                                                                      |                               | 0.5                                                   | 0-2     | 0                      | 0        | 0          |           |                                   |                                 |  |  |
|                                                        | Expression                                                         |                                                                      |                               | 0.5                                                   | 0-2     | 0.5                    | 0.5      | 0          |           |                                   |                                 |  |  |
| Functional Alteration                                  | Patient Cells                                                      |                                                                      |                               | 1                                                     | 0-2     | 0                      | 0        | 0          | 2         | Swan et al 2014 (PMID:25210054)   |                                 |  |  |
|                                                        | Non-Patient Cells                                                  |                                                                      |                               | 0.5                                                   | 0-1     | 0.25                   | 0        | 0          |           |                                   |                                 |  |  |
| Models                                                 | Non-human model organism                                           |                                                                      |                               | 2                                                     | 0-4     | 0                      | 0        | 0          | 4         |                                   |                                 |  |  |
|                                                        | Cell culture model                                                 |                                                                      |                               | 1                                                     | 0-2     | 0                      | 0        | 0          |           |                                   |                                 |  |  |
| Rescue                                                 | Rescue in human                                                    |                                                                      |                               | 2                                                     | 0-4     | 0                      | 0        | 0          | 4         |                                   |                                 |  |  |
|                                                        | Rescue in non-human model organism                                 |                                                                      |                               | 2                                                     | 0-4     | 0                      | 0        | 0          |           |                                   |                                 |  |  |
|                                                        | Rescue in cell culture model                                       |                                                                      |                               | 1                                                     | 0-2     | 0                      | 0        | 0          |           |                                   |                                 |  |  |
|                                                        | Rescue in Patient Cells                                            |                                                                      |                               | 1                                                     | 0-2     | 0                      | 0        | 0          |           |                                   |                                 |  |  |
| <b>Total Experimental Evidence Points (Maximum 6):</b> |                                                                    |                                                                      |                               |                                                       |         |                        | 0.75     | 0.5        | 0         | 6                                 |                                 |  |  |
| <b>Total:</b>                                          |                                                                    |                                                                      |                               |                                                       |         |                        | <b>3</b> | <b>2.5</b> | <b>0</b>  |                                   |                                 |  |  |

Gene Classification Matrices – SQTs

CACNA1C

| Genetic Evidence Summary                               |                            |                                                                    |                                                                      |  |           |                        |                   |                           |                                                            |           |           |                                          |
|--------------------------------------------------------|----------------------------|--------------------------------------------------------------------|----------------------------------------------------------------------|--|-----------|------------------------|-------------------|---------------------------|------------------------------------------------------------|-----------|-----------|------------------------------------------|
| Case-Level Data                                        | Evidence Type              |                                                                    | Case Information                                                     |  |           | Suggested              |                   | Points Given              |                                                            |           | Max Score | PMIDs                                    |
|                                                        | Variant Evidence           |                                                                    |                                                                      |  |           | Default                | Range             | G1                        | G2                                                         | G3        |           |                                          |
|                                                        | Variant Evidence           | Autosomal dominant disease, OR X-linked disease, affected males    | Variant is <i>de novo</i>                                            |  |           | 2                      | 0-3               | 0                         | 0                                                          | 0         | 12        | 24291113<br>17224476; 28427417; 20817017 |
|                                                        |                            |                                                                    | Proband with predicted or proven null variant                        |  |           | 1.5                    | 0-2               | 0                         | 0                                                          | 0         | 10        |                                          |
|                                                        |                            |                                                                    | Proband with other variant type with some evidence of gene impact    |  |           | 0.5                    | 0-1.5             | 0                         | 0                                                          | 0         | 7         |                                          |
|                                                        | Segregation Evidence       | Autosomal recessive disease, OR X-linked disease, affected females | Two variants in <i>trans</i> , at least one is LOF or <i>de novo</i> |  |           | 2                      | 0-3               | 0                         | 0                                                          | 0         | 12        |                                          |
|                                                        |                            |                                                                    | Two non-LOF variants in <i>trans</i>                                 |  |           | 1                      | 0-1.5             | 0                         | 0                                                          | 0         |           |                                          |
|                                                        |                            |                                                                    | Evidence of Segregation in one or more families                      |  |           | Total LOD Sco          | Sequencing Method | Candidate Gene Sequencing | Exam of Gene mo or all geneo resequenced in linkage region | 0-3       | 0         |                                          |
| 2-2.99                                                 | 0.5                        | 1                                                                  |                                                                      |  |           |                        |                   |                           |                                                            |           |           |                                          |
| 3-4.99                                                 | 1                          | 2                                                                  |                                                                      |  |           |                        |                   |                           |                                                            |           |           |                                          |
| ≥5                                                     | 1.5                        | 3                                                                  |                                                                      |  |           |                        |                   |                           |                                                            |           |           |                                          |
| Case-Control Data                                      | Case-Control Study Type    |                                                                    | Case-Control Quality Criteria                                        |  |           | Suggested points/study |                   | Points Given              |                                                            |           | Max Score |                                          |
|                                                        | Single Variant Analysis    |                                                                    | Variant Detection Methodology<br>Power                               |  |           | 0-6                    |                   | 0                         | 0                                                          | 0         | 12        |                                          |
|                                                        | Aggregate Variant Analysis |                                                                    | Bias and Confounding Factors<br>Statistical Significance             |  |           | 0-6                    |                   | 0                         | 0                                                          | 0         |           |                                          |
| <b>Total Genetic Evidence Points (Maximum 12):</b>     |                            |                                                                    |                                                                      |  |           |                        |                   | 0                         | 0                                                          | 0         | 12        |                                          |
| Experimental Evidence Summary                          |                            |                                                                    |                                                                      |  |           |                        |                   |                           |                                                            |           |           |                                          |
| Evidence Category                                      |                            | Evidence Type                                                      |                                                                      |  | Suggested |                        | Points Given      |                           |                                                            | Max Score |           |                                          |
| Function                                               |                            | Biochemical Function                                               |                                                                      |  | 0.5       | 0-2                    | 0                 | 0                         | 0                                                          | 2         |           |                                          |
|                                                        |                            | Protein Interaction                                                |                                                                      |  | 0.5       | 0-2                    | 0                 | 0                         | 0                                                          |           |           |                                          |
|                                                        |                            | Expression                                                         |                                                                      |  | 0.5       | 0-2                    | 0                 | 0                         | 0.5                                                        |           |           |                                          |
| Functional Alteration                                  |                            | Patient Cells                                                      |                                                                      |  | 1         | 0-2                    | 0                 | 0                         | 0                                                          | 2         |           |                                          |
|                                                        |                            | Non-Patient Cells                                                  |                                                                      |  | 0.5       | 0-1                    | 1                 | 0                         | 1.5                                                        |           |           |                                          |
| Models                                                 |                            | Non-human model organism                                           |                                                                      |  | 2         | 0-4                    | 0                 | 0                         | 0                                                          | 4         |           |                                          |
|                                                        |                            | Cell culture model                                                 |                                                                      |  | 1         | 0-2                    | 0                 | 0                         | 0                                                          |           |           |                                          |
| Rescue                                                 |                            | Rescue in human                                                    |                                                                      |  | 2         | 0-4                    | 0                 | 0                         | 0                                                          |           |           |                                          |
|                                                        |                            | Rescue in non-human model organism                                 |                                                                      |  | 2         | 0-4                    | 0                 | 0                         | 0                                                          |           |           |                                          |
|                                                        |                            | Rescue in cell culture model                                       |                                                                      |  | 1         | 0-2                    | 0                 | 0                         | 0                                                          |           |           |                                          |
|                                                        |                            | Rescue in Patient Cells                                            |                                                                      |  | 1         | 0-2                    | 0                 | 0                         | 0                                                          |           |           |                                          |
| <b>Total Experimental Evidence Points (Maximum 6):</b> |                            |                                                                    |                                                                      |  |           |                        |                   | 1                         | 0                                                          | 2         | 6         |                                          |
| <b>Summary</b>                                         |                            |                                                                    |                                                                      |  |           |                        |                   | 1                         | 0                                                          | 2         |           |                                          |

CACNA2D1

**Genetic Evidence Summary**

| Case-Level Data      | Evidence Type                                                      |                                                                      | Case Information                                                  |                   |     | Suggested                 |                                                             | Points Given |       |    | Max | PMIDs/Notes        |   |
|----------------------|--------------------------------------------------------------------|----------------------------------------------------------------------|-------------------------------------------------------------------|-------------------|-----|---------------------------|-------------------------------------------------------------|--------------|-------|----|-----|--------------------|---|
|                      | Variant Evidence                                                   |                                                                      | Default                                                           | Range             |     | G1                        | G2                                                          | G3           | Score |    |     |                    |   |
|                      | Variant Evidence                                                   | Autosomal dominant disease, OR X-linked disease, affected males      | Variant is <i>de novo</i>                                         |                   |     | 2                         | 0-3                                                         | 0            | 0     | 0  | 12  | 21383000; 29016797 |   |
|                      |                                                                    |                                                                      | Proband with predicted or proven null variant                     |                   |     | 1.5                       | 0-2                                                         | 0            | 0     | 0  | 10  |                    |   |
|                      |                                                                    |                                                                      | Proband with other variant type with some evidence of gene impact |                   |     | 0.5                       | 0-1.5                                                       | 0            | 0     | 0  | 7   |                    |   |
|                      | Autosomal recessive disease, OR X-linked disease, affected females | Two variants in <i>trans</i> , at least one is LOF or <i>de novo</i> |                                                                   |                   | 2   | 0-3                       | 0                                                           | 0            | 0     | 12 |     |                    |   |
|                      |                                                                    | Two non-LOF variants in <i>trans</i>                                 |                                                                   |                   | 1   | 0-1.5                     | 0                                                           | 0            | 0     | 12 |     |                    |   |
| Segregation Evidence | Evidence of Segregation in one or more families                    |                                                                      | Total LOD Score                                                   | Sequencing Method |     | Candidate Gene Sequencing | Exam of Gene model or all genes sequenced in linkage region | 0-3          | 0     | 0  | 0   | 3                  |   |
|                      |                                                                    |                                                                      |                                                                   | 2-2.99            | 0.5 |                           |                                                             |              |       |    |     |                    | 1 |
|                      |                                                                    |                                                                      |                                                                   | 3-4.99            | 1   |                           |                                                             |              |       |    |     |                    | 2 |
|                      |                                                                    |                                                                      |                                                                   | ≥5                | 1.5 |                           |                                                             |              |       |    |     |                    | 3 |

| Case-Control Data                                  | Case-Control Study Type                                  | Case-Control Quality Criteria          | Suggested points/study | Points Given |   |    | Max Score |
|----------------------------------------------------|----------------------------------------------------------|----------------------------------------|------------------------|--------------|---|----|-----------|
|                                                    | Single Variant Analysis                                  | Variant Detection Methodology<br>Power | 0-6                    | 0            | 0 | 0  | 12        |
| Aggregate Variant Analysis                         | Bias and Confounding Factors<br>Statistical Significance | 0-6                                    | 0                      | 0            | 0 | 12 |           |
| <b>Total Genetic Evidence Points (Maximum 12):</b> |                                                          |                                        |                        | 0            | 0 | 0  | 12        |

**Experimental Evidence Summary**

| Evidence Category                                      | Evidence Type                      | Suggested |       | Points Given |            |            | Max Score |
|--------------------------------------------------------|------------------------------------|-----------|-------|--------------|------------|------------|-----------|
|                                                        |                                    | Default   | Range | G1           | G2         | G3         |           |
| Function                                               | Biochemical Function               | 0.5       | 0-2   | 0            | 0          | 0          | 2         |
|                                                        | Protein Interaction                | 0.5       | 0-2   | 0            | 0          | 0.5        |           |
|                                                        | Expression                         | 0.5       | 0-2   | 0            | 0          | 0          |           |
| Functional Alteration                                  | Patient Cells                      | 1         | 0-2   | 0            | 0          | 0          | 2         |
|                                                        | Non-Patient Cells                  | 0.5       | 0-1   | 0.5          | 0.5        | 1          |           |
| Models                                                 | Non-human model organism           | 2         | 0-4   | 0            | 0          | 0          | 4         |
|                                                        | Cell culture model                 | 1         | 0-2   | 0            | 0          | 0          |           |
| Rescue                                                 | Rescue in human                    | 2         | 0-4   | 0            | 0          | 0          |           |
|                                                        | Rescue in non-human model organism | 2         | 0-4   | 0            | 0          | 0          |           |
|                                                        | Rescue in cell culture model       | 1         | 0-2   | 0            | 0          | 0          |           |
|                                                        | Rescue in Patient Cells            | 1         | 0-2   | 0            | 0          | 0          |           |
| <b>Total Experimental Evidence Points (Maximum 6):</b> |                                    |           |       | 0.5          | 0.5        | 1.5        | 6         |
| <b>Summary</b>                                         |                                    |           |       | <b>0.5</b>   | <b>0.5</b> | <b>1.5</b> |           |



| Genetic Evidence Summary                               |                                    |                                                                    |                                                                      |        |           |                        |                           |                                                         |            |           |           |       |          |
|--------------------------------------------------------|------------------------------------|--------------------------------------------------------------------|----------------------------------------------------------------------|--------|-----------|------------------------|---------------------------|---------------------------------------------------------|------------|-----------|-----------|-------|----------|
| Case-Level Data                                        | Evidence Type                      |                                                                    | Case Information                                                     |        |           | Suggested              |                           | Points Given                                            |            |           | Max Score | PMIDs |          |
|                                                        | Variant Evidence                   |                                                                    |                                                                      |        |           | Default                | Range                     | G1                                                      | G2         | G3        |           |       |          |
|                                                        | Variant Evidence                   | Autosomal dominant disease, OR X-linked disease, affected males    | Variant is <i>de novo</i>                                            |        |           | 2                      | 0-3                       | 0                                                       | 0          | 0         | 0         | 12    | 17224476 |
|                                                        |                                    |                                                                    | Proband with predicted or proven null variant                        |        |           | 1.5                    | 0-2                       | 0                                                       | 0          | 0         | 0         | 10    |          |
|                                                        |                                    |                                                                    | Proband with other variant type with some evidence of gene impact    |        |           | 0.5                    | 0-1.5                     | 0                                                       | 0          | 0         | 0         | 7     |          |
|                                                        | Segregation Evidence               | Autosomal recessive disease, OR X-linked disease, affected females | Two variants in <i>trans</i> , at least one is LOF or <i>de novo</i> |        |           | 2                      | 0-3                       | 0                                                       | 0          | 0         | 0         | 12    |          |
|                                                        |                                    |                                                                    | Two non-LOF variants in <i>trans</i>                                 |        |           | 1                      | 0-1.5                     | 0.5                                                     | 0          | 0         | 0         | 0     |          |
|                                                        |                                    |                                                                    | Evidence of Segregation in one or more families                      |        |           | Total LOD Score        | Candidate Gene Sequencing | Example/Genome or all genes sequenced in linkage region | 0-3        | 0         | 0         | 0     |          |
|                                                        |                                    |                                                                    |                                                                      | 2-2.99 | 0.5       | 1                      |                           |                                                         |            |           |           |       |          |
|                                                        |                                    |                                                                    |                                                                      | 3-4.99 | 1         | 2                      |                           |                                                         |            |           |           |       |          |
|                                                        |                                    |                                                                    |                                                                      | ≥5     | 1.5       | 3                      |                           |                                                         |            |           |           |       |          |
| Case-Control Data                                      | Case-Control Study Type            |                                                                    | Case-Control Quality Criteria                                        |        |           | Suggested points/study |                           | Points Given                                            |            |           | Max Score |       |          |
|                                                        | Single Variant Analysis            |                                                                    | Variant Detection Methodology<br>Power                               |        |           | 0-6                    |                           | 0                                                       | 0          | 0         | 12        |       |          |
|                                                        | Aggregate Variant Analysis         |                                                                    | Bias and Confounding Factors<br>Statistical Significance             |        |           | 0-6                    |                           | 0                                                       | 0          | 0         | 0         |       |          |
| <b>Total Genetic Evidence Points (Maximum 12):</b>     |                                    |                                                                    |                                                                      |        |           |                        | 0.5                       | 0                                                       | 0          | 0         | 12        |       |          |
| Experimental Evidence Summary                          |                                    |                                                                    |                                                                      |        |           |                        |                           |                                                         |            |           |           |       |          |
| Evidence Category                                      |                                    | Evidence Type                                                      |                                                                      |        | Suggested |                        | Points Given              |                                                         |            | Max Score |           |       |          |
|                                                        |                                    |                                                                    |                                                                      |        | Default   | Range                  | G1                        | G2                                                      | G3         |           |           |       |          |
| Function                                               | Biochemical Function               |                                                                    |                                                                      | 0.5    | 0-2       | 0                      | 0                         | 0                                                       | 0          | 2         |           |       |          |
|                                                        | Protein Interaction                |                                                                    |                                                                      | 0.5    | 0-2       | 0                      | 0                         | 0                                                       | 0          |           |           |       |          |
|                                                        | Expression                         |                                                                    |                                                                      | 0.5    | 0-2       | 0                      | 0                         | 0                                                       | 0          |           |           |       |          |
| Functional Alteration                                  | Patient Cells                      |                                                                    |                                                                      | 1      | 0-2       | 0                      | 0                         | 0                                                       | 0          | 2         |           |       |          |
|                                                        | Non-Patient Cells                  |                                                                    |                                                                      | 0.5    | 0-1       | 0.5                    | 0                         | 0.5                                                     | 0          |           |           |       |          |
| Models                                                 | Non-human model organism           |                                                                    |                                                                      | 2      | 0-4       | 0                      | 0                         | 0                                                       | 0          | 4         |           |       |          |
|                                                        | Cell culture model                 |                                                                    |                                                                      | 1      | 0-2       | 0                      | 0                         | 0                                                       | 0          |           |           |       |          |
| Rescue                                                 | Rescue in human                    |                                                                    |                                                                      | 2      | 0-4       | 0                      | 0                         | 0                                                       | 0          |           |           |       |          |
|                                                        | Rescue in non-human model organism |                                                                    |                                                                      | 2      | 0-4       | 0                      | 0                         | 0                                                       | 0          |           |           |       |          |
|                                                        | Rescue in cell culture model       |                                                                    |                                                                      | 1      | 0-2       | 0                      | 0                         | 0                                                       | 0          |           |           |       |          |
|                                                        |                                    |                                                                    | Rescue in Patient Cells                                              |        |           | 1                      | 0-2                       | 0                                                       | 0          | 0         |           |       |          |
| <b>Total Experimental Evidence Points (Maximum 6):</b> |                                    |                                                                    |                                                                      |        |           |                        | 0.5                       | 0                                                       | 0.5        | 6         |           |       |          |
| <b>Summary</b>                                         |                                    |                                                                    |                                                                      |        |           |                        | <b>1</b>                  | <b>0</b>                                                | <b>0.5</b> |           |           |       |          |

## Genetic Evidence Summary

|                                                        | Evidence Type                        |                                                                    | Case Information                                                     |                 | Suggested                                              |                        | Points Given |              |                                                                                                   | Max   | PMIDs/Notes                                                                                                                      |   |
|--------------------------------------------------------|--------------------------------------|--------------------------------------------------------------------|----------------------------------------------------------------------|-----------------|--------------------------------------------------------|------------------------|--------------|--------------|---------------------------------------------------------------------------------------------------|-------|----------------------------------------------------------------------------------------------------------------------------------|---|
|                                                        |                                      |                                                                    |                                                                      |                 | Default                                                | Range                  | G1           | G2           | G3                                                                                                | Score |                                                                                                                                  |   |
| Case-Level Data                                        | Variant Evidence                     | Autosomal dominant disease, OR X-linked disease, affected males    | Variant is <i>de novo</i>                                            |                 | 2                                                      | 0-3                    | 0            | 0            | 0                                                                                                 | 12    | 14676148; 19340359; 25335996; 21130771; 29876509; 29016797; 28491588; 30571592; 15828882; 18692916; 25974115; 21310316; 31072576 |   |
|                                                        |                                      |                                                                    | Proband with predicted or proven null variant                        |                 | 1.5                                                    | 0-2                    | 0            | 0            | 0                                                                                                 | 10    |                                                                                                                                  |   |
|                                                        |                                      | Proband with other variant type with some evidence of gene impact  |                                                                      | 0.5             | 0-1.5                                                  | 7.25                   | 7            | 7            | 7                                                                                                 |       |                                                                                                                                  |   |
|                                                        |                                      | Autosomal recessive disease, OR X-linked disease, affected females | Two variants in <i>trans</i> , at least one is LOF or <i>de novo</i> |                 | 2                                                      | 0-3                    | 0            | 0            | 0                                                                                                 | 12    |                                                                                                                                  |   |
|                                                        | Two non-LOF variants in <i>trans</i> |                                                                    | 1                                                                    | 0-1.5           | 0                                                      | 0                      | 0            | 0            |                                                                                                   |       |                                                                                                                                  |   |
|                                                        | Segregation Evidence                 | Evidence of Segregation in one or more families                    |                                                                      | Total LOD Score | Sequencing Method                                      |                        | 0-3          | 0            | 0                                                                                                 | 0     |                                                                                                                                  | 3 |
| Candidate Gene Sequencing                              |                                      |                                                                    |                                                                      |                 | Exoner/Grain for all genes sequenced in linkage region |                        |              |              |                                                                                                   |       |                                                                                                                                  |   |
|                                                        |                                      |                                                                    |                                                                      |                 | 2-2.99                                                 | 0.5                    |              |              |                                                                                                   |       | 1                                                                                                                                |   |
|                                                        |                                      |                                                                    |                                                                      |                 | 3-4.99                                                 | 1                      |              |              |                                                                                                   |       | 2                                                                                                                                |   |
| ≥5                                                     | 1.5                                  | 3                                                                  |                                                                      |                 |                                                        |                        |              |              |                                                                                                   |       |                                                                                                                                  |   |
| Case-Control Data                                      | Case-Control Study Type              |                                                                    | Case-Control Quality Criteria                                        |                 |                                                        | Suggested points/study |              | Points Given |                                                                                                   |       | Max Score                                                                                                                        |   |
|                                                        | Single Variant Analysis              |                                                                    | Variant Detection Methodology<br>Power                               |                 |                                                        | 0-6                    |              | 0            | 0                                                                                                 | 0     | 12                                                                                                                               |   |
|                                                        | Aggregate Variant Analysis           |                                                                    | Bias and Confounding Factors<br>Statistical Significance             |                 |                                                        | 0-6                    |              | 0            | 0                                                                                                 | 0     | 0                                                                                                                                |   |
| <b>Total Genetic Evidence Points (Maximum 12):</b>     |                                      |                                                                    |                                                                      |                 |                                                        |                        | 7            | 7            | 7                                                                                                 | 12    |                                                                                                                                  |   |
| Experimental Evidence Summary                          |                                      |                                                                    |                                                                      |                 |                                                        |                        |              |              |                                                                                                   |       |                                                                                                                                  |   |
| Evidence Category                                      | Evidence Type                        |                                                                    | Suggested                                                            |                 | Points Given                                           |                        |              | Max          |                                                                                                   |       |                                                                                                                                  |   |
|                                                        |                                      |                                                                    | Default                                                              | Range           | G1                                                     | G2                     | G3           | Score        |                                                                                                   |       |                                                                                                                                  |   |
| Function                                               | Biochemical Function                 |                                                                    | 0.5                                                                  | 0-2             | 0.5                                                    | 0                      | 0            | 2            | 7736582                                                                                           |       |                                                                                                                                  |   |
|                                                        | Protein Interaction                  |                                                                    | 0.5                                                                  | 0-2             | 0                                                      | 0                      | 0            |              |                                                                                                   |       |                                                                                                                                  |   |
|                                                        | Expression                           |                                                                    | 0.5                                                                  | 0-2             | 0.5                                                    | 0.5                    | 1            |              | 7889573; 24974115; 25974115                                                                       |       |                                                                                                                                  |   |
| Functional Alteration                                  | Patient Cells                        |                                                                    | 1                                                                    | 0-2             | 1.5                                                    | 0                      | 1            | 2            | 29574456; 30582453; 31072576                                                                      |       |                                                                                                                                  |   |
|                                                        | Non-Patient Cells                    |                                                                    | 0.5                                                                  | 0-1             | 1.5                                                    | 2                      | 1            |              | 14676148; 9547387; 15673388; 18692916; 21130771; 29759541; 31049424; 25974115; 30175559; 19088443 |       |                                                                                                                                  |   |
| Models                                                 | Non-human model organism             |                                                                    | 2                                                                    | 0-4             | 2                                                      | 2                      | 2            | 4            | 30496390                                                                                          |       |                                                                                                                                  |   |
|                                                        | Cell culture model                   |                                                                    | 1                                                                    | 0-2             | 0                                                      | 0                      | 0            |              |                                                                                                   |       |                                                                                                                                  |   |
| Rescue                                                 | Rescue in human                      |                                                                    | 2                                                                    | 0-4             | 0                                                      | 0                      | 0            |              |                                                                                                   |       |                                                                                                                                  |   |
|                                                        | Rescue in non-human model organism   |                                                                    | 2                                                                    | 0-4             | 0                                                      | 0                      | 0            |              |                                                                                                   |       |                                                                                                                                  |   |
|                                                        | Rescue in cell culture model         |                                                                    | 1                                                                    | 0-2             | 0                                                      | 0                      | 0            |              | 30947366                                                                                          |       |                                                                                                                                  |   |
|                                                        | Rescue in Patient Cells              |                                                                    | 1                                                                    | 0-2             | 0                                                      | 0                      | 0            |              |                                                                                                   |       |                                                                                                                                  |   |
| <b>Total Experimental Evidence Points (Maximum 6):</b> |                                      |                                                                    |                                                                      |                 |                                                        |                        | 5            | 4.5          | 5                                                                                                 | 6     |                                                                                                                                  |   |
| <b>Summary</b>                                         |                                      |                                                                    |                                                                      |                 |                                                        |                        | 12           | 11.5         | 12                                                                                                |       |                                                                                                                                  |   |

**Genetic Evidence Summary**

| Case-Level Data                                        | Evidence Type                                                      |                                                                      | Case Information                                         |                           |                                                       | Suggested              |                                                                 | Points Given              |                                                                     |    | Max Score                             | PMIDs |
|--------------------------------------------------------|--------------------------------------------------------------------|----------------------------------------------------------------------|----------------------------------------------------------|---------------------------|-------------------------------------------------------|------------------------|-----------------------------------------------------------------|---------------------------|---------------------------------------------------------------------|----|---------------------------------------|-------|
|                                                        | Variant Evidence                                                   |                                                                      |                                                          |                           | Default                                               | Range                  | G1                                                              | G2                        | G3                                                                  |    |                                       |       |
|                                                        |                                                                    |                                                                      |                                                          |                           |                                                       |                        | Autosomal dominant disease, OR X-linked disease, affected males | Variant is <i>de novo</i> |                                                                     |    | 2                                     | 0-3   |
|                                                        | Proband with predicted or proven null variant                      |                                                                      |                                                          | 1.5                       | 0-2                                                   | 0                      |                                                                 | 0                         | 0                                                                   | 10 |                                       |       |
|                                                        | Proband with other variant type with some evidence of gene impact  |                                                                      |                                                          | 0.5                       | 0-1.5                                                 | 1                      |                                                                 | 1.5                       | 2.5                                                                 | 7  | 2479485; 29615871; 23375927; 22155372 |       |
|                                                        | Autosomal recessive disease, OR X-linked disease, affected females | Two variants in <i>trans</i> , at least one is LOF or <i>de novo</i> |                                                          |                           |                                                       | 2                      | 0-3                                                             | 0                         | 0                                                                   | 0  | 12                                    |       |
|                                                        |                                                                    | Two non-LOF variants in <i>trans</i>                                 |                                                          |                           |                                                       | 1                      | 0-1.5                                                           | 0                         | 0                                                                   | 0  |                                       |       |
|                                                        | Segregation Evidence                                               | Evidence of Segregation in one or more families                      | Sequencing Method                                        | Candidate Gene Sequencing | Exome/Genome or all genes sequenced in linkage region | 0-3                    | 0                                                               | 0                         | 0                                                                   | 3  |                                       |       |
|                                                        |                                                                    |                                                                      |                                                          |                           |                                                       |                        |                                                                 |                           |                                                                     |    | Total LOD Sc                          |       |
| 2-2.99                                                 |                                                                    |                                                                      |                                                          |                           |                                                       |                        |                                                                 |                           |                                                                     |    | 0.5                                   | 1     |
| 3-4.99                                                 |                                                                    |                                                                      |                                                          |                           |                                                       |                        |                                                                 |                           |                                                                     |    | 1                                     | 2     |
| ≥5                                                     | 1.5                                                                | 3                                                                    |                                                          |                           |                                                       |                        |                                                                 |                           |                                                                     |    |                                       |       |
| Case-Control Data                                      | Case-Control Study Type                                            |                                                                      | Case-Control Quality Criteria                            |                           |                                                       | Suggested points/study |                                                                 | G1                        | G2                                                                  | G3 | Max Score                             |       |
|                                                        | Single Variant Analysis                                            |                                                                      | Variant Detection Methodology<br>Power                   |                           |                                                       | 0-6                    |                                                                 | 0                         | 0                                                                   | 0  | 12                                    |       |
|                                                        | Aggregate Variant Analysis                                         |                                                                      | Bias and Confounding Factors<br>Statistical Significance |                           |                                                       | 0-6                    |                                                                 | 0                         | 0                                                                   | 0  |                                       |       |
| <b>Total Genetic Evidence Points (Maximum 12):</b>     |                                                                    |                                                                      |                                                          |                           |                                                       |                        | 5                                                               | 5.5                       | 6.5                                                                 | 12 |                                       |       |
| Experimental Evidence Summary                          |                                                                    |                                                                      |                                                          |                           |                                                       |                        |                                                                 |                           |                                                                     |    |                                       |       |
| Evidence Category                                      | Evidence Type                                                      |                                                                      | Suggested                                                |                           | Points Given                                          |                        |                                                                 | Max Score                 |                                                                     |    |                                       |       |
|                                                        |                                                                    |                                                                      | Default                                                  | Range                     | G1                                                    | G2                     | G3                                                              |                           |                                                                     |    |                                       |       |
| Function                                               | Biochemical Function                                               |                                                                      | 0.5                                                      | 0-2                       | 1                                                     | 0                      | 0.5                                                             | 2                         | 11410627                                                            |    |                                       |       |
|                                                        | Protein Interaction                                                |                                                                      | 0.5                                                      | 0-2                       | 0                                                     | 0                      | 0                                                               |                           |                                                                     |    |                                       |       |
|                                                        | Expression                                                         |                                                                      | 0.5                                                      | 0-2                       | 1                                                     | 2                      | 0.5                                                             |                           | 11410627                                                            |    |                                       |       |
| Functional Alteration                                  | Patient Cells                                                      |                                                                      | 1                                                        | 0-2                       | 0                                                     | 0                      | 0                                                               | 2                         | 15761194; 19285083; 2215537; 23440193; 24794853; 29615871; 19710529 |    |                                       |       |
|                                                        | Non-Patient Cells                                                  |                                                                      | 0.5                                                      | 0-1                       | 2                                                     | 2                      | 2                                                               |                           |                                                                     |    |                                       |       |
| Models                                                 | Non-human model organism                                           |                                                                      | 2                                                        | 0-4                       | 0                                                     | 0                      | 0                                                               | 4                         |                                                                     |    |                                       |       |
|                                                        | Cell culture model                                                 |                                                                      | 1                                                        | 0-2                       | 0                                                     | 0                      | 0                                                               |                           |                                                                     |    |                                       |       |
| Rescue                                                 | Rescue in human                                                    |                                                                      | 2                                                        | 0-4                       | 0                                                     | 0                      | 0                                                               | 4                         |                                                                     |    |                                       |       |
|                                                        | Rescue in non-human model organism                                 |                                                                      | 2                                                        | 0-4                       | 0                                                     | 0                      | 0                                                               |                           |                                                                     |    |                                       |       |
|                                                        | Rescue in cell culture model                                       |                                                                      | 1                                                        | 0-2                       | 0                                                     | 0                      | 0                                                               |                           |                                                                     |    |                                       |       |
|                                                        | Rescue in Patient Cells                                            |                                                                      | 1                                                        | 0-2                       | 0                                                     | 0                      | 0                                                               |                           |                                                                     |    |                                       |       |
| <b>Total Experimental Evidence Points (Maximum 6):</b> |                                                                    |                                                                      |                                                          |                           |                                                       |                        | 4                                                               | 4                         | 4                                                                   | 6  |                                       |       |
| <b>Summary:</b>                                        |                                                                    |                                                                      |                                                          |                           |                                                       |                        | 9                                                               | 9.5                       | 10.5                                                                |    |                                       |       |

**Genetic Evidence Summary**

| Case-Level Data                                        | Evidence Type                                                      |                                                                      | Case Information              |                                 | Suggested                                          |       | Points Given |           |                                                                      | Max Score | PMIDs  |     |   |
|--------------------------------------------------------|--------------------------------------------------------------------|----------------------------------------------------------------------|-------------------------------|---------------------------------|----------------------------------------------------|-------|--------------|-----------|----------------------------------------------------------------------|-----------|--------|-----|---|
|                                                        |                                                                    |                                                                      |                               |                                 | Default                                            | Range | G1           | G2        | G3                                                                   |           |        |     |   |
| Variant Evidence                                       | Autosomal dominant disease, OR X-linked disease, affected males    | Variant is <i>de novo</i>                                            | 2                             | 0-3                             | 6                                                  | 6     | 6            | 12        | 16109388; 28491547                                                   |           |        |     |   |
|                                                        |                                                                    | Proband with predicted or proven null variant                        | 1.5                           | 0-2                             | 0                                                  | 0     | 0            | 10        |                                                                      |           |        |     |   |
|                                                        |                                                                    | Proband with other variant type with some evidence of gene impact    | 0.5                           | 0-1.5                           | 2.5                                                | 3     | 3.5          | 7         | 15159330; 24380499; 25974115; 26168993; 26346102; 26279191; 28491751 |           |        |     |   |
|                                                        | Autosomal recessive disease, OR X-linked disease, affected females | Two variants in <i>trans</i> , at least one is LOF or <i>de novo</i> | 2                             | 0-3                             | 0                                                  | 0     | 0            | 12        |                                                                      |           |        |     |   |
|                                                        |                                                                    | Two non-LOF variants in <i>trans</i>                                 | 1                             | 0-1.5                           | 0                                                  | 0     | 0            |           |                                                                      |           |        |     |   |
| Segregation Evidence                                   | Evidence of Segregation in one or more families                    | Total LOD Score                                                      | Sequencing Method             |                                 | 0-3                                                | 0     | 0            | 0.5       | 3                                                                    |           |        |     |   |
|                                                        |                                                                    |                                                                      | Candidate Gene Sequencing     | Exome/Genome or all gene region |                                                    |       |              |           |                                                                      |           |        |     |   |
|                                                        |                                                                    |                                                                      |                               |                                 |                                                    |       |              |           |                                                                      |           | 2-2.99 | 0.5 | 1 |
|                                                        |                                                                    |                                                                      |                               |                                 |                                                    |       |              |           |                                                                      |           | 3-4.99 | 1   | 2 |
| ≥5                                                     | 1.5                                                                | 3                                                                    |                               |                                 |                                                    |       |              |           |                                                                      |           |        |     |   |
| Case-Control Data                                      | Case-Control Study Type                                            |                                                                      | Case-Control Quality Criteria |                                 | Suggested points/study                             |       | Points Given |           |                                                                      | Max Score |        |     |   |
|                                                        | Single Variant Analysis                                            | Variant Detection Methodology                                        |                               | 0-6                             |                                                    | 0     | 0            | 0         | 12                                                                   |           |        |     |   |
|                                                        |                                                                    | Power                                                                |                               |                                 |                                                    |       |              |           |                                                                      |           |        |     |   |
| Aggregate Variant Analysis                             | Bias and Confounding Factors                                       |                                                                      | 0-6                           |                                 | 0                                                  | 0     | 0            |           |                                                                      |           |        |     |   |
|                                                        |                                                                    |                                                                      |                               |                                 | <b>Total Genetic Evidence Points (Maximum 12):</b> |       | 8.5          | 9         | 10                                                                   | 12        |        |     |   |
| <b>Experimental Evidence Summary</b>                   |                                                                    |                                                                      |                               |                                 |                                                    |       |              |           |                                                                      |           |        |     |   |
| Evidence Category                                      | Evidence Type                                                      |                                                                      | Suggested                     |                                 | Points Given                                       |       |              | Max Score |                                                                      |           |        |     |   |
|                                                        |                                                                    |                                                                      | Default                       | Range                           | G1                                                 | G2    | G3           |           |                                                                      |           |        |     |   |
| Function                                               | Biochemical Function                                               |                                                                      | 0.5                           | 0-2                             | 1                                                  | 0     | 0            | 2         | 8900283                                                              |           |        |     |   |
|                                                        | Protein Interaction                                                |                                                                      | 0.5                           | 0-2                             | 0                                                  | 0.5   | 0            |           |                                                                      |           |        |     |   |
|                                                        | Expression                                                         |                                                                      | 0.5                           | 0-2                             | 1                                                  | 0     | 1            |           | 8528244                                                              |           |        |     |   |
| Functional Alteration                                  | Patient Cells                                                      |                                                                      | 1                             | 0-2                             | 0                                                  | 0     | 0            | 2         | 15159330; 16109388; 26168993; 26346102; 29213224                     |           |        |     |   |
|                                                        | Non-Patient Cells                                                  |                                                                      | 0.5                           | 0-1                             | 2.5                                                | 2.5   | 2            |           |                                                                      |           |        |     |   |
| Models                                                 | Non-human model organism                                           |                                                                      | 2                             | 0-4                             | 0                                                  | 0     | 0            | 4         |                                                                      |           |        |     |   |
|                                                        | Cell culture model                                                 |                                                                      | 1                             | 0-2                             | 0                                                  | 0     | 0            |           |                                                                      |           |        |     |   |
| Rescue                                                 | Rescue in human                                                    |                                                                      | 2                             | 0-4                             | 0                                                  | 0     | 0            |           |                                                                      |           |        |     |   |
|                                                        | Rescue in non-human model organism                                 |                                                                      | 2                             | 0-4                             | 0                                                  | 0     | 0            |           |                                                                      |           |        |     |   |
|                                                        | Rescue in cell culture model                                       |                                                                      | 1                             | 0-2                             | 0                                                  | 0     | 0            |           |                                                                      |           |        |     |   |
|                                                        | Rescue in Patient Cells                                            |                                                                      | 1                             | 0-2                             | 0                                                  | 0     | 0            |           |                                                                      |           |        |     |   |
| <b>Total Experimental Evidence Points (Maximum 6):</b> |                                                                    |                                                                      |                               |                                 | 4                                                  | 2.5   | 3            | 6         |                                                                      |           |        |     |   |
|                                                        |                                                                    |                                                                      |                               |                                 | <b>Summary</b>                                     |       | 12.5         | 11.5      | 13                                                                   |           |        |     |   |

| Genetic Evidence Summary                               |                                    |                                                                    |                                                                      |                               |              |                           |                                                       |              |              |    |       |          |   |
|--------------------------------------------------------|------------------------------------|--------------------------------------------------------------------|----------------------------------------------------------------------|-------------------------------|--------------|---------------------------|-------------------------------------------------------|--------------|--------------|----|-------|----------|---|
| Case-Level Data                                        | Evidence Type                      |                                                                    | Case Information                                                     |                               |              | Suggested                 |                                                       | Points Given |              |    | Max   | PMIDs    |   |
|                                                        | Variant Evidence                   |                                                                    |                                                                      |                               |              | Default                   | Range                                                 | G1           | G2           | G3 | Score |          |   |
|                                                        | Variant Evidence                   | Autosomal dominant disease, OR X-linked disease, affected males    | Variant is <i>de novo</i>                                            |                               |              | 2                         | 0-3                                                   | 0            | 0            | 0  | 12    | 22490985 |   |
|                                                        |                                    |                                                                    | Proband with predicted or proven null variant                        |                               |              | 1.5                       | 0-2                                                   | 0            | 0            | 0  | 10    |          |   |
|                                                        |                                    |                                                                    | Proband with other variant type with some evidence of gene impact    |                               |              | 0.5                       | 0-1.5                                                 | 0            | 0            | 0  | 7     |          |   |
|                                                        | Segregation Evidence               | Autosomal recessive disease, OR X-linked disease, affected females | Two variants in <i>trans</i> , at least one is LOF or <i>de novo</i> |                               |              | 2                         | 0-3                                                   | 0            | 0            | 0  | 12    |          |   |
|                                                        |                                    |                                                                    | Two non-LOF variants in <i>trans</i>                                 |                               |              | 1                         | 0-1.5                                                 | 0            | 0            | 0  | 7     |          |   |
|                                                        |                                    |                                                                    | Total LOD Score                                                      | Sequencing Method             |              | Candidate Gene Sequencing | Exome/Genome or all genes sequenced in linkage region | 0-3          | 0            | 0  | 0     |          | 3 |
|                                                        |                                    |                                                                    |                                                                      | 2-2.99                        | 0.5          |                           |                                                       |              |              |    |       |          |   |
|                                                        | 3-4.99                             | 1                                                                  |                                                                      | 2                             |              |                           |                                                       |              |              |    |       |          |   |
|                                                        | ≥5                                 | 1.5                                                                | 3                                                                    |                               |              |                           |                                                       |              |              |    |       |          |   |
|                                                        | Case-Control Data                  | Case-Control Study Type                                            |                                                                      | Case-Control Quality Criteria |              |                           | Suggested points/study                                |              | Points Given |    |       | Max      |   |
| Single Variant Analysis                                |                                    | Variant Detection Methodology<br>Power                             |                                                                      |                               | 0-6          |                           | 0                                                     | 0            | 0            | 12 |       |          |   |
| Aggregate Variant Analysis                             |                                    | Bias and Confounding Factors<br>Statistical Significance           |                                                                      |                               | 0-6          |                           | 0                                                     | 0            | 0            |    |       |          |   |
| <b>Total Genetic Evidence Points (Maximum 12):</b>     |                                    |                                                                    |                                                                      |                               |              | 0                         | 0                                                     | 0            | 0            | 12 |       |          |   |
| Experimental Evidence Summary                          |                                    |                                                                    |                                                                      |                               |              |                           |                                                       |              |              |    |       |          |   |
| Evidence Category                                      | Evidence Type                      |                                                                    | Suggested                                                            |                               | Points Given |                           |                                                       | Max          |              |    |       |          |   |
|                                                        |                                    |                                                                    | Default                                                              | Range                         | G1           | G2                        | G3                                                    | Score        |              |    |       |          |   |
| Function                                               | Biochemical Function               |                                                                    | 0.5                                                                  | 0-2                           | 0.5          | 0                         | 0                                                     | 2            | 1309946      |    |       |          |   |
|                                                        | Protein Interaction                |                                                                    | 0.5                                                                  | 0-2                           | 0            | 0                         | 0                                                     |              |              |    |       |          |   |
|                                                        | Expression                         |                                                                    | 0.5                                                                  | 0-2                           | 0.5          | 0                         | 0                                                     |              | 1309946      |    |       |          |   |
| Functional Alteration                                  | Patient Cells                      |                                                                    | 1                                                                    | 0-2                           | 0            | 0                         | 0                                                     | 2            |              |    |       |          |   |
|                                                        | Non-Patient Cells                  |                                                                    | 0.5                                                                  | 0-1                           | 0.25         | 0                         | 0                                                     |              | 22490985     |    |       |          |   |
| Models                                                 | Non-human model organism           |                                                                    | 2                                                                    | 0-4                           | 0            | 0                         | 0                                                     | 4            |              |    |       |          |   |
|                                                        | Cell culture model                 |                                                                    | 1                                                                    | 0-2                           | 0            | 0                         | 0                                                     |              |              |    |       |          |   |
| Rescue                                                 | Rescue in human                    |                                                                    | 2                                                                    | 0-4                           | 0            | 0                         | 0                                                     | 6            |              |    |       |          |   |
|                                                        | Rescue in non-human model organism |                                                                    | 2                                                                    | 0-4                           | 0            | 0                         | 0                                                     |              |              |    |       |          |   |
|                                                        | Rescue in cell culture model       |                                                                    | 1                                                                    | 0-2                           | 0            | 0                         | 0                                                     |              |              |    |       |          |   |
|                                                        | Rescue in Patient Cells            |                                                                    | 1                                                                    | 0-2                           | 0            | 0                         | 0                                                     |              |              |    |       |          |   |
| <b>Total Experimental Evidence Points (Maximum 6):</b> |                                    |                                                                    |                                                                      |                               |              | 1.25                      | 0                                                     | 0            | 6            |    |       |          |   |
| <b>Summary</b>                                         |                                    |                                                                    |                                                                      |                               |              | 1.25                      | 0                                                     | 0            |              |    |       |          |   |

SLC4A3

**Genetic Evidence Summary**

| Case-Level Data                                        | Evidence Type                                                      |                                                                      | Case Information                                      |                           |                                                       | Suggested                                                       |                           | Can          | Ita | Hol       | Max Score | PMIDs    |     |          |    |
|--------------------------------------------------------|--------------------------------------------------------------------|----------------------------------------------------------------------|-------------------------------------------------------|---------------------------|-------------------------------------------------------|-----------------------------------------------------------------|---------------------------|--------------|-----|-----------|-----------|----------|-----|----------|----|
|                                                        | Variant Evidence                                                   |                                                                      |                                                       |                           |                                                       | Default                                                         | Range                     |              |     |           |           |          |     |          |    |
|                                                        |                                                                    |                                                                      |                                                       |                           |                                                       | Autosomal dominant disease, OR X-linked disease, affected males | Variant is <i>de novo</i> | 2            | 0-3 | 0         | 0         | 0        | 12  | 29167417 |    |
|                                                        | Proband with predicted or proven null variant                      | 1.5                                                                  | 0-2                                                   | 0                         | 0                                                     |                                                                 | 0                         | 10           |     |           |           |          |     |          |    |
|                                                        | Proband with other variant type with some evidence of gene impact  | 0.5                                                                  | 0-1.5                                                 | 0.5                       | 1                                                     |                                                                 | 2                         | 7            |     |           |           |          |     |          |    |
|                                                        | Autosomal recessive disease, OR X-linked disease, affected females | Two variants in <i>trans</i> , at least one is LOF or <i>de novo</i> | 2                                                     | 0-3                       | 0                                                     | 0                                                               | 0                         | 12           |     |           |           |          |     |          |    |
|                                                        |                                                                    | Two non-LOF variants in <i>trans</i>                                 | 1                                                     | 0-1.5                     | 0                                                     | 0                                                               | 0                         |              |     |           |           |          |     |          |    |
| Segregation Evidence                                   | Evidence of Segregation in one or more families                    | Sequencing Method                                                    | Total LOD Sco                                         | Candidate Gene Sequencing | Exome/Genome or all genes sequenced in linkage region | 0-3                                                             | 3                         | 3            | 3   | 3         | 29167417  |          |     |          |    |
|                                                        |                                                                    |                                                                      |                                                       |                           |                                                       |                                                                 |                           |              |     |           |           | 2-2.99   | 0.5 | 1        |    |
|                                                        |                                                                    |                                                                      |                                                       |                           |                                                       |                                                                 |                           |              |     |           |           | 3-4.99   | 1   | 2        |    |
|                                                        |                                                                    |                                                                      |                                                       |                           |                                                       |                                                                 |                           |              |     |           |           | ≥5       | 1.5 | 3        |    |
| Case-Control Data                                      | Case-Control Study Type                                            |                                                                      | Case-Control Quality Criteria                         |                           |                                                       | Suggested points/study                                          |                           | Points Given |     |           | Max Score |          |     |          |    |
|                                                        | Single Variant Analysis                                            |                                                                      | Variant Detection Methodology Power                   |                           |                                                       | 0-6                                                             |                           |              |     |           |           | 0        | 0   | 0        | 12 |
|                                                        | Aggregate Variant Analysis                                         |                                                                      | Bias and Confounding Factors Statistical Significance |                           |                                                       | 0-6                                                             |                           |              |     |           |           |          |     |          |    |
| <b>Total Genetic Evidence Points (Maximum 12):</b>     |                                                                    |                                                                      |                                                       |                           |                                                       |                                                                 |                           | 3.5          | 4   | 5         | 12        |          |     |          |    |
| <b>Experimental Evidence Summary</b>                   |                                                                    |                                                                      |                                                       |                           |                                                       |                                                                 |                           |              |     |           |           |          |     |          |    |
| Evidence Category                                      |                                                                    | Evidence Type                                                        |                                                       |                           | Suggested                                             |                                                                 | Points Given              |              |     | Max Score |           |          |     |          |    |
|                                                        |                                                                    |                                                                      |                                                       |                           | Default                                               | Range                                                           |                           |              |     |           |           |          |     |          |    |
| Function                                               | Biochemical Function                                               |                                                                      | 0.5                                                   | 0-2                       | 2                                                     | 0                                                               | 0.5                       | 2            | 0   | 0.5       | 29167417  |          |     |          |    |
|                                                        | Protein Interaction                                                |                                                                      | 0.5                                                   | 0-2                       | 0                                                     | 0                                                               | 0.5                       |              |     |           |           | 29167417 |     |          |    |
|                                                        | Expression                                                         |                                                                      | 0.5                                                   | 0-2                       | 0                                                     | 0                                                               | 0.5                       |              |     |           |           |          |     |          |    |
| Functional Alteration                                  | Patient Cells                                                      |                                                                      | 1                                                     | 0-2                       | 0                                                     | 0                                                               | 0                         | 2            | 0   | 0.5       | 29167417  |          |     |          |    |
|                                                        | Non-Patient Cells                                                  |                                                                      | 0.5                                                   | 0-1                       | 1                                                     | 0                                                               | 0                         |              |     |           |           |          |     |          |    |
| Models                                                 | Non-human model organism                                           |                                                                      | 2                                                     | 0-4                       | 1                                                     | 2                                                               | 2                         | 4            | 0   | 0         | 29167417  |          |     |          |    |
|                                                        | Cell culture model                                                 |                                                                      | 1                                                     | 0-2                       | 0                                                     | 0                                                               | 0                         |              |     |           |           |          |     |          |    |
| Rescue                                                 | Rescue in human                                                    |                                                                      | 2                                                     | 0-4                       | 0                                                     | 0                                                               | 0                         | 4            | 0   | 0         | 29167417  |          |     |          |    |
|                                                        | Rescue in non-human model organism                                 |                                                                      | 2                                                     | 0-4                       | 2                                                     | 2                                                               | 0                         |              |     |           |           |          |     |          |    |
|                                                        | Rescue in cell culture model                                       |                                                                      | 1                                                     | 0-2                       | 0                                                     | 0                                                               | 0                         |              |     |           |           |          |     |          |    |
|                                                        | Rescue in Patient Cells                                            |                                                                      | 1                                                     | 0-2                       | 0                                                     | 0                                                               | 0                         |              |     |           |           |          |     |          |    |
| <b>Total Experimental Evidence Points (Maximum 6):</b> |                                                                    |                                                                      |                                                       |                           |                                                       |                                                                 |                           | 6            | 4   | 4         | 6         |          |     |          |    |
| <b>Summary</b>                                         |                                                                    |                                                                      |                                                       |                           |                                                       |                                                                 |                           | 9.5          | 8   | 9         |           |          |     |          |    |

**Genetic Evidence Summary**

| Case-Level Data                                        | Evidence Type                                                      |                                                                      | Case Information              |                           |                                                      | Suggested              |              | Can          | Ita | Hol       | Max Score          | PMIDs |   |    |
|--------------------------------------------------------|--------------------------------------------------------------------|----------------------------------------------------------------------|-------------------------------|---------------------------|------------------------------------------------------|------------------------|--------------|--------------|-----|-----------|--------------------|-------|---|----|
|                                                        |                                                                    |                                                                      |                               |                           |                                                      | Default                | Range        |              |     |           |                    |       |   |    |
| Variant Evidence                                       | Autosomal dominant disease, OR X-linked disease, affected males    | Variant is <i>de novo</i>                                            | 2                             | 0-3                       | 0                                                    | 0                      | 0            | 0            | 0   | 12        |                    |       |   |    |
|                                                        |                                                                    | Proband with predicted or proven null variant                        | 1.5                           | 0-2                       | 0                                                    | 0                      | 0            | 0            | 0   | 10        |                    |       |   |    |
|                                                        |                                                                    | Proband with other variant type with some evidence of gene impact    | 0.5                           | 0-1.5                     | 0                                                    | 0                      | 0            | 0            | 0   | 7         |                    |       |   |    |
|                                                        | Autosomal recessive disease, OR X-linked disease, affected females | Two variants in <i>trans</i> , at least one is LOF or <i>de novo</i> | 2                             | 0-3                       | 0                                                    | 0                      | 0            | 0            | 0   | 12        | 26190315           |       |   |    |
|                                                        |                                                                    | Two non-LOF variants in <i>trans</i>                                 | 1                             | 0-1.5                     | 0                                                    | 0                      | 0            | 0            | 0   | 12        | 31472821; 30069296 |       |   |    |
| Segregation Evidence                                   | Evidence of Segregation in one or more families                    | Sequencing Method                                                    | Total LOD Score               | Candidate Gene Sequencing | Exome/Genome or all gene sequenced in linkage region | 0-3                    | 0            | 0            | 0   | 3         |                    |       |   |    |
|                                                        |                                                                    |                                                                      |                               |                           |                                                      |                        |              |              |     |           | 2-2.99             | 0.5   | 1 |    |
|                                                        |                                                                    |                                                                      |                               |                           |                                                      |                        |              |              |     |           | 3-4.99             | 1     | 2 |    |
|                                                        |                                                                    |                                                                      |                               |                           |                                                      |                        |              |              |     |           | ≥5                 | 1.5   | 3 |    |
|                                                        |                                                                    |                                                                      |                               |                           |                                                      |                        |              |              |     |           |                    |       |   |    |
| Case-Control Data                                      | Case-Control Study Type                                            |                                                                      | Case-Control Quality Criteria |                           |                                                      | Suggested points/study |              | Points Given |     |           | Max Score          |       |   |    |
|                                                        | Single Variant Analysis                                            | Variant Detection Methodology                                        |                               |                           | 0-6                                                  |                        | 0            |              |     |           |                    | 0     | 0 | 12 |
|                                                        |                                                                    | Power                                                                |                               |                           | 0-6                                                  |                        |              |              |     |           |                    |       |   |    |
| Aggregate Variant Analysis                             | Bias and Confounding Factors                                       |                                                                      |                               | 0-6                       |                                                      | 0                      | 0            | 0            |     |           |                    |       |   |    |
| <b>Total Genetic Evidence Points (Maximum 12):</b>     |                                                                    |                                                                      |                               |                           |                                                      |                        |              | 0            | 0   | 0         | 12                 |       |   |    |
| <b>Experimental Evidence Summary</b>                   |                                                                    |                                                                      |                               |                           |                                                      |                        |              |              |     |           |                    |       |   |    |
| Evidence Category                                      |                                                                    | Evidence Type                                                        |                               |                           | Suggested                                            |                        | Points Given |              |     | Max Score |                    |       |   |    |
|                                                        |                                                                    |                                                                      |                               |                           | Default Range                                        |                        |              |              |     |           |                    |       |   |    |
| Function                                               | Biochemical Function                                               |                                                                      |                               | 0.5                       | 0-2                                                  | 0                      | 0            | 0            | 2   |           |                    |       |   |    |
|                                                        | Protein Interaction                                                |                                                                      |                               | 0.5                       | 0-2                                                  | 0                      | 0            | 0            |     |           |                    |       |   |    |
|                                                        | Expression                                                         |                                                                      |                               | 0.5                       | 0-2                                                  | 0                      | 0            | 0            |     |           |                    |       |   |    |
| Functional Alteration                                  | Patient Cells                                                      |                                                                      |                               | 1                         | 0-2                                                  | 0                      | 0            | 0            | 2   |           |                    |       |   |    |
|                                                        | Non-Patient Cells                                                  |                                                                      |                               | 0.5                       | 0-1                                                  | 0                      | 0            | 0            |     |           |                    |       |   |    |
| Models                                                 | Non-human model organism                                           |                                                                      |                               | 2                         | 0-4                                                  | 0                      | 0            | 0            | 4   |           |                    |       |   |    |
|                                                        | Cell culture model                                                 |                                                                      |                               | 1                         | 0-2                                                  | 0                      | 0            | 0            |     |           |                    |       |   |    |
| Rescue                                                 | Rescue in human                                                    |                                                                      |                               | 2                         | 0-4                                                  | 0                      | 0            | 0            |     |           |                    |       |   |    |
|                                                        | Rescue in non-human model organism                                 |                                                                      |                               | 2                         | 0-4                                                  | 0                      | 0            | 0            |     |           |                    |       |   |    |
|                                                        | Rescue in cell culture model                                       |                                                                      |                               | 1                         | 0-2                                                  | 0                      | 0            | 0            |     |           |                    |       |   |    |
| Rescue in Patient Cells                                |                                                                    |                                                                      | 1                             | 0-2                       | 0                                                    | 0                      | 0            |              |     |           |                    |       |   |    |
| <b>Total Experimental Evidence Points (Maximum 6):</b> |                                                                    |                                                                      |                               |                           |                                                      |                        |              | 0            | 0   | 0         | 6                  |       |   |    |
| <b>Summary:</b>                                        |                                                                    |                                                                      |                               |                           |                                                      |                        |              | 0            | 0   | 0         |                    |       |   |    |
